# Supplementary material for: Clinical BRCA1/2 Reversion Analysis Identifies Hotspot Mutations and Predicted Neoantigens Associated with Therapy Resistance
Source: Oxford University Press journal article supplement (doi:10.1158/2159-8290.cd-19-1485), 2020-07-22
Supplement: 21598290cd191485-sup-234162_2_supp_6377363_qcdn6v.xlsx [file 21598290cd191485-sup-234162_2_supp_6377363_qcdn6v.xlsx]

## Sheet: Incidence_output
Supplementary Table 5 Incidence dataset for comparisons with BRCA1/2 pathogenic mutations.
Study_ID	Gene	Pathogenic mutation	Study	Site	CDS Position
523	BRCA1	c.34C>T	Tung	Breast	34
Song_1	BRCA1	c.34C>T	Song	Ovarian	34
556	BRCA1	c.66dupA	Tung	Breast	66
Yap_BRCA_18	BRCA1	c.66dupA	Yap	Ovarian	66
PRAD-01115577-Tumor-SM-A56E9	BRCA1	c.68_69delAG	Metastatic Prostate Adenocarcinoma (SU2C/PCF Dream Team, PNAS 2019)	Prostate	68
104	BRCA1	c.68_69del	Tung	Breast	68
524	BRCA1	c.68_69del	Tung	Breast	68
558	BRCA1	c.68_69del	Tung	Breast	68
601	BRCA1	c.68_69del	Tung	Breast	68
614	BRCA1	c.68_69del	Tung	Breast	68
620	BRCA1	c.68_69del	Tung	Breast	68
867	BRCA1	c.68_69del	Tung	Breast	68
Alsop_2	BRCA1	c.68_69delAG	Alsop	Ovarian	68
Alsop_3	BRCA1	c.68_69delAG	Alsop	Ovarian	68
Alsop_4	BRCA1	c.68_69delAG	Alsop	Ovarian	68
Alsop_5	BRCA1	c.68_69delAG	Alsop	Ovarian	68
Yap_BRCA_21	BRCA1	c.68_69delAG	Yap	Ovarian	68
Lin_46	BRCA1	c.68_69delAG	Lin	Ovarian	68
Lin_10	BRCA1	c.68_69delAG	Lin	Ovarian	68
Lin_30	BRCA1	c.68_69delAG	Lin	Ovarian	68
Lin_35	BRCA1	c.68_69delAG	Lin	Ovarian	68
Lin_72	BRCA1	c.68_69delAG	Lin	Ovarian	68
Lin_103	BRCA1	c.68_69delAG	Lin	Ovarian	68
Castro_1-1	BRCA1	c.68_69delAG	Castro	Prostate	68
Castro_1-2	BRCA1	c.68_69delAG	Castro	Prostate	68
Castro_1-3	BRCA1	c.68_69delAG	Castro	Prostate	68
Castro_1-4	BRCA1	c.68_69delAG	Castro	Prostate	68
Alsop_6	BRCA1	c.70_80delTGTCCCATCTG	Alsop	Ovarian	70
AOCS-114	BRCA1	c.80+3516_135-4361del	Patch	Ovarian	80
Alsop_8	BRCA1	c.81-1G>A	Alsop	Ovarian	81
Yap_BRCA_19	BRCA1	c.81-2A>T Splice	Yap	Ovarian	81
Alsop_9	BRCA1	c.102delT	Alsop	Ovarian	102
415	BRCA1	c.122A>G	Tung	Breast	122
509	BRCA1	c.122A>T	Tung	Breast	122
Lin_65	BRCA1	c.124_125insT	Lin	Ovarian	124
Alsop_7	BRCA1	c.131G>T	Alsop	Ovarian	131
Lin_21	BRCA1	c.135-1G>T	Lin	Ovarian	135
MO_1071-Tumor	BRCA1	c.181T>G	Metastatic Prostate Adenocarcinoma (SU2C/PCF Dream Team, PNAS 2019)	Prostate	181
367	BRCA1	c.181T>G	Tung	Breast	181
398	BRCA1	c.181T>G	Tung	Breast	181
AOCS-137	BRCA1	c.181T>G	Patch	Ovarian	181
Lin_100	BRCA1	c.181T>G	Lin	Ovarian	181
GeparSixto_4-1	BRCA1	c.181T>G	GeparSixto	Breast	181
GeparSixto_4-2	BRCA1	c.181T>G	GeparSixto	Breast	181
GeparSixto_4-3	BRCA1	c.181T>G	GeparSixto	Breast	181
GeparSixto_4-4	BRCA1	c.181T>G	GeparSixto	Breast	181
Alsop_11	BRCA1	c.188T>A	Alsop	Ovarian	188
AOCS-034¬∂	BRCA1	c.188T>A	Patch	Ovarian	188
585	BRCA1	c.190T>G	Tung	Breast	190
5	BRCA1	c.211A>G	Tung	Breast	211
Lin_112	BRCA1	c.212+1G>T	Lin	Ovarian	212
443	BRCA1	c.213-11T>G	Tung	Breast	213
534	BRCA1	c.213-11T>G	Tung	Breast	213
602	BRCA1	c.213-11T>G	Tung	Breast	213
Alsop_13	BRCA1	c.213-11T>G	Alsop	Ovarian	213
Song_2	BRCA1	c.213-11T>G	Song	Ovarian	213
Lin_64	BRCA1	c.213-2A>G	Lin	Ovarian	213
Lin_67	BRCA1	c.241C>T	Lin	Ovarian	241
Alsop_15	BRCA1	c.271delT	Alsop	Ovarian	271
547	BRCA1	c.273del	Tung	Breast	273
Alsop_10	BRCA1	c.300T>G	Alsop	Ovarian	300
Alsop_14	BRCA1	c.301+1G>A	Alsop	Ovarian	301
P-0015674-T01-IM6	BRCA1	c.302-1G>C	Breast Cancer (MSK, Cancer Cell 2018)	Breast	302
Alsop_19	BRCA1	c.302-2delA	Alsop	Ovarian	302
Yap_res	BRCA1	c.329dup	Yap	Ovarian	329
Alsop_20	BRCA1	c.374dupT	Alsop	Ovarian	374
AOCS-065	BRCA1	c.379delA	Patch	Ovarian	379
Alsop_17	BRCA1	c.427G>T	Alsop	Ovarian	427
Song_3	BRCA1	c.427G>T	Song	Ovarian	427
Song_4	BRCA1	c.427G>T	Song	Ovarian	427
Song_5	BRCA1	c.427G>T	Song	Ovarian	427
Song_6	BRCA1	c.427G>T	Song	Ovarian	427
AOCS-139	BRCA1	c.427G>T	Patch	Ovarian	427
Yap_3	BRCA1	c.427G>T	Yap	Breast	427
Yap_BRCA_12	BRCA1	c.427G>T	Yap	Ovarian	427
Alsop_18	BRCA1	c.441+1G>A	Alsop	Ovarian	441
Song_7	BRCA1	c.442-3_442-3delT	Song	Ovarian	442
AOCS-130	BRCA1	c.445G>T	Patch	Ovarian	445
Alsop_16	BRCA1	c.498delA	Alsop	Ovarian	498
ICGC_0089	BRCA1	c.547+1G>A	Pancreatic Adenocarcinoma (QCMG, Nature 2016)	Pancreas	547
Alsop_22	BRCA1	c.594-2A>C	Alsop	Ovarian	594
Lin_51	BRCA1	c.594-2A>C	Lin	Ovarian	594
Song_8	BRCA1	c.670+1G>A	Song	Ovarian	670
Alsop_66	BRCA1	c.797_798delTT	Alsop	Ovarian	797
167	BRCA1	c.798_799del	Tung	Breast	798
869	BRCA1	c.815_824dup	Tung	Breast	815
Song_9	BRCA1	c.823_824insTA	Song	Ovarian	823
Song_10	BRCA1	c.843_846delCTCA	Song	Ovarian	843
Song_11	BRCA1	c.843_846delCTCA	Song	Ovarian	843
MB-6060	BRCA1	c.845C>A	Breast Cancer (METABRIC, Nature 2012 & Nat Commun 2016)	Breast	845
Song_12	BRCA1	c.929delA	Song	Ovarian	929
Song_13	BRCA1	c.929delA	Song	Ovarian	929
Song_14	BRCA1	c.929delA	Song	Ovarian	929
885	BRCA1	c.1016dupA	Tung	Breast	1016
PD4107a	BRCA1	c.1017_1018insA	Breast Invasive Carcinoma (Sanger, Nature 2012)	Breast	1017
Song_15	BRCA1	c.1039_1040delCT	Song	Ovarian	1039
Lin_2	BRCA1	c.1045G>T	Lin	Ovarian	1045
BR-V-036	BRCA1	c.1080C>A	Breast Invasive Carcinoma (Broad, Nature 2012)	Breast	1080
Lin_93	BRCA1	c.1105_1114delGATGTTCCTT	Lin	Ovarian	1105
Alsop_36	BRCA1	c.1106_1107insTC	Alsop	Ovarian	1106
802	BRCA1	c.1116G>A	Tung	Breast	1116
Lin_1	BRCA1	c.1125_1125delA	Lin	Ovarian	1125
Lin_5	BRCA1	c.1174_1213del40	Lin	Ovarian	1174
Lin_24	BRCA1	c.1174_1213del40	Lin	Ovarian	1174
Alsop_37	BRCA1	c.1175_1214del39	Alsop	Ovarian	1175
Castro_2-1	BRCA1	c.1175_1214del40	Castro	Prostate	1175
Lin_48	BRCA1	c.1279G>T	Lin	Ovarian	1279
TCGA-29-2427-01	BRCA1	c.1292T>G	Ovarian Serous Cystadenocarcinoma (TCGA, Provisional)	Ovarian	1292
Alsop_25	BRCA1	c.1294del40	Alsop	Ovarian	1294
Lin_92	BRCA1	c.1296_1303delGGCCAGTG	Lin	Ovarian	1296
Song_16	BRCA1	c.1374delC	Song	Ovarian	1374
Lin_94	BRCA1	c.1379_1380insA	Lin	Ovarian	1379
Song_17	BRCA1	c.1504_1508delTTAAA	Song	Ovarian	1504
Alsop_38	BRCA1	c.1508delA	Alsop	Ovarian	1508
AOCS-105	BRCA1	c.1510delC	Patch	Ovarian	1510
Song_18	BRCA1	c.1512dupT	Song	Ovarian	1512
588	BRCA1	c.1529C>A	Tung	Breast	1529
Song_19	BRCA1	c.1556delA	Song	Ovarian	1556
517	BRCA1	c.1601_1602del	Tung	Breast	1601
GeparSixto_5-1	BRCA1	c.1621C>T	GeparSixto	Breast	1621
Lin_3	BRCA1	c.1671_1671delA	Lin	Ovarian	1671
474	BRCA1	c.1682_1683del	Tung	Breast	1682
Alsop_31	BRCA1	c.1687C>T	Alsop	Ovarian	1687
Song_20	BRCA1	c.1687C>T	Song	Ovarian	1687
Lin_90	BRCA1	c.1687C>T	Lin	Ovarian	1687
Lin_96	BRCA1	c.1707_1707delC	Lin	Ovarian	1707
574	BRCA1	c.1757del	Tung	Breast	1757
Lin_23	BRCA1	c.1793T>G	Lin	Ovarian	1793
868	BRCA1	c.1823_1826del	Tung	Breast	1823
Song_21	BRCA1	c.1823_1826delAGAA	Song	Ovarian	1823
71	BRCA1	c.1874_1877dupTAGT	Tung	Breast	1874
Lin_18	BRCA1	c.1892_1893delTA	Lin	Ovarian	1892
P-0003885-T01-IM5	BRCA1	c.1942G>T	Breast Cancer (MSK, Cancer Cell 2018)	Breast	1942
138	BRCA1	c.1960A>T	Tung	Breast	1960
438	BRCA1	c.1960A>T	Tung	Breast	1960
Alsop_39	BRCA1	c.1961delA	Alsop	Ovarian	1961
Alsop_40	BRCA1	c.1961delA	Alsop	Ovarian	1961
Alsop_41	BRCA1	c.1961delA	Alsop	Ovarian	1961
Alsop_42	BRCA1	c.1961delA	Alsop	Ovarian	1961
Song_22	BRCA1	c.1961dupA	Song	Ovarian	1961
Song_23	BRCA1	c.1961dupA	Song	Ovarian	1961
Castro_3-1	BRCA1	c.1961dupA	Castro	Prostate	1961
GeparSixto_6-1	BRCA1	c.1961del	GeparSixto	Breast	1961
Song_24	BRCA1	c.2035A>T	Song	Ovarian	2035
Alsop_43	BRCA1	c.2068delA	Alsop	Ovarian	2068
Song_25	BRCA1	c.2071delA	Song	Ovarian	2071
Song_26	BRCA1	c.2071delA	Song	Ovarian	2071
Song_27	BRCA1	c.2071delA	Song	Ovarian	2071
Castro_4-1	BRCA1	c.2071delA	Castro	Prostate	2071
Castro_5-1	BRCA1	c.2073dupA	Castro	Prostate	2073
566	BRCA1	c.2090dupT	Tung	Breast	2090
Lin_105	BRCA1	c.2104_2104delT	Lin	Ovarian	2104
TCGA-A2-A25B-01	BRCA1	c.2158G>T	Breast Invasive Carcinoma (TCGA, Cell 2015)	Breast	2158
AOCS-134¬∂	BRCA1	c.2162_2163delTT	Patch	Ovarian	2162
Song_28	BRCA1	c.2188G>T	Song	Ovarian	2188
Song_29	BRCA1	c.2188G>T	Song	Ovarian	2188
GeparSixto_7-1	BRCA1	c.2197_2201del	GeparSixto	Breast	2197
Alsop_32	BRCA1	c.2215A>T	Alsop	Ovarian	2215
Song_30	BRCA1	c.2217dupA	Song	Ovarian	2217
Lin_13	BRCA1	c.2238_2238delC	Lin	Ovarian	2238
Alsop_23	BRCA1	c.2267delG	Alsop	Ovarian	2267
458	BRCA1	c.2272_2273del	Tung	Breast	2272
Alsop_33	BRCA1	c.2338C>T	Alsop	Ovarian	2338
GeparSixto_8-1	BRCA1	c.2338C>T	GeparSixto	Breast	2338
GeparSixto_8-2	BRCA1	c.2338C>T	GeparSixto	Breast	2338
111	BRCA1	c.2359dupG	Tung	Breast	2359
Alsop_24	BRCA1	c.2389_2390delGA	Alsop	Ovarian	2389
Lin_34	BRCA1	c.2410C>T	Lin	Ovarian	2410
GeparSixto_9-1	BRCA1	c.2411_2412del	GeparSixto	Breast	2411
448	BRCA1	c.2433del	Tung	Breast	2433
780	BRCA1	c.2457del	Tung	Breast	2457
Song_31	BRCA1	c.2457delC	Song	Ovarian	2457
621	BRCA1	c.2475del	Tung	Breast	2475
721	BRCA1	c.2475del	Tung	Breast	2475
Song_32	BRCA1	c.2475delC	Song	Ovarian	2475
Lin_60	BRCA1	c.2494_2494delC	Lin	Ovarian	2494
Alsop_44	BRCA1	c.2504_2505insAAGTATCCATTGGGACA	Alsop	Ovarian	2504
GeparSixto_10-1	BRCA1	c.2515del	GeparSixto	Breast	2515
Lin_70	BRCA1	c.2521_2521delC	Lin	Ovarian	2521
Lin_43	BRCA1	c.2559_2560insGC	Lin	Ovarian	2559
Castro_6-1	BRCA1	c.2594delC	Castro	Prostate	2594
42	BRCA1	c.2649_2650insGGCA	Tung	Breast	2649
Song_33	BRCA1	c.2678delA	Song	Ovarian	2678
Alsop_45	BRCA1	c.2679_2682delGAAA	Alsop	Ovarian	2679
Lin_75	BRCA1	c.2679_2679delG	Lin	Ovarian	2679
Alsop_46	BRCA1	c.2680_2681delAA	Alsop	Ovarian	2680
300	BRCA1	c.2681_2682del	Tung	Breast	2681
837	BRCA1	c.2681_2682del	Tung	Breast	2681
Alsop_47	BRCA1	c.2681_2682delAA	Alsop	Ovarian	2681
Song_34	BRCA1	c.2681_2682delAA	Song	Ovarian	2681
Song_35	BRCA1	c.2681_2682delAA	Song	Ovarian	2681
Song_36	BRCA1	c.2681_2682delAA	Song	Ovarian	2681
Alsop_48	BRCA1	c.2694delA	Alsop	Ovarian	2694
Alsop_34	BRCA1	c.2716A>T	Alsop	Ovarian	2716
AOCS-143	BRCA1	c.2716A>T	Patch	Ovarian	2716
632	BRCA1	c.2722G>T	Tung	Breast	2722
Song_37	BRCA1	c.2761C>T	Song	Ovarian	2761
TCGA-A1-A0SH-01	BRCA1	c.2800C>T	Breast Invasive Carcinoma (TCGA, Cell 2015)	Breast	2800
PD4003a	BRCA1	c.2806_2809delGATA	Breast Invasive Carcinoma (Sanger, Nature 2012)	Breast	2806
Lin_47	BRCA1	c.2834_2836GTA>C	Lin	Ovarian	2834
Alsop_49	BRCA1	c.2836_2837delinsC	Alsop	Ovarian	2836
Song_38	BRCA1	c.2857dupT	Song	Ovarian	2857
Lin_9	BRCA1	c.2904_2904delA	Lin	Ovarian	2904
Alsop_50	BRCA1	c.2921T>A	Alsop	Ovarian	2921
Song_39	BRCA1	c.2940delA	Song	Ovarian	2940
Alsop_35	BRCA1	c.2963C>A	Alsop	Ovarian	2963
AOCS-058	BRCA1	c.2963C>A	Patch	Ovarian	2963
Song_40	BRCA1	c.2989_2990dupAA	Song	Ovarian	2989
Song_41	BRCA1	c.3005delA	Song	Ovarian	3005
606	BRCA1	c.3029_3030del	Tung	Breast	3029
805	BRCA1	c.3029_3030del	Tung	Breast	3029
Lin_63	BRCA1	c.3034_3035delAG	Lin	Ovarian	3034
Song_42	BRCA1	c.3048_3052dupTGAGA	Song	Ovarian	3048
Lin_16	BRCA1	c.3154_3154delA	Lin	Ovarian	3154
Song_43	BRCA1	c.3205delC	Song	Ovarian	3205
Alsop_51	BRCA1	c.3228_3229delAG	Alsop	Ovarian	3228
AOCS-146	BRCA1	c.3228_3229delAG	Patch	Ovarian	3228
Song_44	BRCA1	c.3254_3255dupGA	Song	Ovarian	3254
Alsop_52	BRCA1	c.3331_3334delCAAG	Alsop	Ovarian	3331
Alsop_53	BRCA1	c.3331_3334delCAAG	Alsop	Ovarian	3331
Song_45	BRCA1	c.3331_3334delCAAG	Song	Ovarian	3331
Yap_BRCA_3	BRCA1	c.3331_3334del	Yap	Ovarian	3331
Yap_BRCA_10	BRCA1	c.3331_3334del	Yap	Breast	3331
Yap_BRCA_9	BRCA1	c.3333del	Yap	Breast	3333
Alsop_54	BRCA1	c.3481_3491delGAAGATACTAG	Alsop	Ovarian	3481
GeparSixto_11-1	BRCA1	c.3485del	GeparSixto	Breast	3485
GeparSixto_11-2	BRCA1	c.3485del	GeparSixto	Breast	3485
AOCS-086	BRCA1	c.3526delG	Patch	Ovarian	3526
485	BRCA1	c.3582_3589del	Tung	Breast	3582
859	BRCA1	c.3598C>T	Tung	Breast	3598
Alsop_55	BRCA1	c.3598C>T	Alsop	Ovarian	3598
Lin_91	BRCA1	c.3598C>T	Lin	Ovarian	3598
Lin_55	BRCA1	c.3607C>T	Lin	Ovarian	3607
Lin_79	BRCA1	c.3626_3627insA	Lin	Ovarian	3626
Alsop_56	BRCA1	c.3627_3682insA	Alsop	Ovarian	3627
Song_46	BRCA1	c.3627dupA	Song	Ovarian	3627
Lin_50	BRCA1	c.3647_3648insA	Lin	Ovarian	3647
370	BRCA1	c.3664G>T	Tung	Breast	3664
Alsop_57	BRCA1	c.3668_3671dupTTCC	Alsop	Ovarian	3668
Alsop_58	BRCA1	c.3671_3672insTTCC	Alsop	Ovarian	3671
GeparSixto_12-1	BRCA1	c.3700_3704del	GeparSixto	Breast	3700
GeparSixto_12-2	BRCA1	c.3700_3704del	GeparSixto	Breast	3700
145	BRCA1	c.3748G>T	Tung	Breast	3748
392	BRCA1	c.3748G>T	Tung	Breast	3748
639	BRCA1	c.3748G>T	Tung	Breast	3748
Song_47	BRCA1	c.3748G>T	Song	Ovarian	3748
223	BRCA1	c.3756_3759del	Tung	Breast	3756
Alsop_59	BRCA1	c.3756_3759delGTCT	Alsop	Ovarian	3756
Alsop_60	BRCA1	c.3756_3759delGTCT	Alsop	Ovarian	3756
Alsop_61	BRCA1	c.3756_3759delGTCT	Alsop	Ovarian	3756
Song_48	BRCA1	c.3756_3759delGTCT	Song	Ovarian	3756
Song_49	BRCA1	c.3756_3759delGTCT	Song	Ovarian	3756
AOCS-145	BRCA1	c.3756_3759delGTCT	Patch	Ovarian	3756
Castro_7-1	BRCA1	c.3756_3759delGTCT	Castro	Prostate	3756
532	BRCA1	c.3759_3760del	Tung	Breast	3759
Lin_78	BRCA1	c.3768_3769delAG	Lin	Ovarian	3768
AOCS-079	BRCA1	c.3774_3790del	Patch	Ovarian	3774
Lin_42	BRCA1	c.3804_3804delT	Lin	Ovarian	3804
Song_50	BRCA1	c.3817C>T	Song	Ovarian	3817
Alsop_26	BRCA1	c.3875_3878delGTCT	Alsop	Ovarian	3875
Alsop_27	BRCA1	c.3879_3880insT	Alsop	Ovarian	3879
GeparSixto_13-1	BRCA1	c.3915del	GeparSixto	Breast	3915
Lin_61	BRCA1	c.3937C>T	Lin	Ovarian	3937
519	BRCA1	c.3947_3950del	Tung	Breast	3947
Song_51	BRCA1	c.4035delA	Song	Ovarian	4035
AOCS-108	BRCA1	c.4035delA	Patch	Ovarian	4035
Yap_7	BRCA1	c.4041_4042delAG	Yap	Breast	4041
Alsop_62	BRCA1	c.4064_4067delTCAA	Alsop	Ovarian	4064
Alsop_63	BRCA1	c.4065_4068del	Alsop	Ovarian	4065
Alsop_64	BRCA1	c.4065_4068delTCAA	Alsop	Ovarian	4065
Song_52	BRCA1	c.4065_4068delTCAA	Song	Ovarian	4065
Song_53	BRCA1	c.4065_4068delTCAA	Song	Ovarian	4065
Song_54	BRCA1	c.4065_4068delTCAA	Song	Ovarian	4065
Song_55	BRCA1	c.4065_4068delTCAA	Song	Ovarian	4065
Song_56	BRCA1	c.4065_4068delTCAA	Song	Ovarian	4065
Song_57	BRCA1	c.4065_4068delTCAA	Song	Ovarian	4065
Song_58	BRCA1	c.4065_4068delTCAA	Song	Ovarian	4065
AOCS-095¬∂	BRCA1	c.4065_4068del	Patch	Ovarian	4065
Castro_8-1	BRCA1	c.4065_4068delTCAA	Castro	Prostate	4065
Castro_8-2	BRCA1	c.4065_4068delTCAA	Castro	Prostate	4065
Castro_8-3	BRCA1	c.4065_4068delTCAA	Castro	Prostate	4065
Alsop_65	BRCA1	c.4066_4069delCAAG	Alsop	Ovarian	4066
Alsop_28	BRCA1	c.4091delG	Alsop	Ovarian	4091
436	BRCA1	c.4096+1G>A	Tung	Breast	4096
Song_59	BRCA1	c.4096+3A>G	Song	Ovarian	4096
AOCS-138	BRCA1	c.4120_4121del	Patch	Ovarian	4120
741	BRCA1	c.4128_4129del	Tung	Breast	4128
Alsop_29	BRCA1	c.4154delA	Alsop	Ovarian	4154
Song_60	BRCA1	c.4165_4166delAG	Song	Ovarian	4165
Alsop_67	BRCA1	c.4183C>T	Alsop	Ovarian	4183
Song_61	BRCA1	c.4183C>T	Song	Ovarian	4183
GeparSixto_14-1	BRCA1	c.4183C>T	GeparSixto	Breast	4183
Alsop_30	BRCA1	c.4184_4187delTCAA	Alsop	Ovarian	4184
GeparSixto_15-1	BRCA1	c.4251_4252del	GeparSixto	Breast	4251
Alsop_70	BRCA1	c.4327C>T	Alsop	Ovarian	4327
Yap_13	BRCA1	c.4327C>T	Yap	Ovarian	4327
Castro_9-1	BRCA1	c.4327C>T	Castro	Prostate	4327
MB-5232	BRCA1	c.4357+1G>A	Breast Cancer (METABRIC, Nature 2012 & Nat Commun 2016)	Breast	4357
Alsop_69	BRCA1	c.4385_4386insG	Alsop	Ovarian	4385
MTS-T0064	BRCA1	c.4389C>A	Breast Cancer (METABRIC, Nature 2012 & Nat Commun 2016)	Breast	4389
Lin_59	BRCA1	c.4389_4389delC	Lin	Ovarian	4389
AOCS-171	BRCA1	c.4399C>T	Patch	Ovarian	4399
s_DS_bkm_036_T	BRCA1	c.4484G>C	Breast Cancer (MSKCC, 2019)	Breast	4484
Alsop_71	BRCA1	c.4484G>A	Alsop	Ovarian	4484
Lin_87	BRCA1	c.4484G>T	Lin	Ovarian	4484
447	BRCA1	c.4524G>A	Tung	Breast	4524
Song_62	BRCA1	c.4574_4575delAA	Song	Ovarian	4574
TCGA-04-1357-01	BRCA1	c.4612C>T	Ovarian Serous Cystadenocarcinoma (TCGA, Provisional)	Ovarian	4612
GeparSixto_16-1	BRCA1	c.4675+1G>A	GeparSixto	Breast	4675
TCGA-BH-A0WA-01	BRCA1	c.4676-1G>A	Breast Invasive Carcinoma (TCGA, Cell 2015)	Breast	4676
302	BRCA1	c.4676-2A>G	Tung	Breast	4676
406	BRCA1	c.4689C>G	Tung	Breast	4689
GeparSixto_17-1	BRCA1	c.4689C>G	GeparSixto	Breast	4689
GeparSixto_17-2	BRCA1	c.4689C>G	GeparSixto	Breast	4689
126	BRCA1	c.4754_4755del	Tung	Breast	4754
Alsop_72	BRCA1	c.4808C>G	Alsop	Ovarian	4808
Alsop_73	BRCA1	c.4868C>G	Alsop	Ovarian	4868
Castro_10-1	BRCA1	c.4945delA	Castro	Prostate	4945
Alsop_74	BRCA1	c.4964_4982delCTGGCCTGACCCCAGAAGA	Alsop	Ovarian	4964
Alsop_75	BRCA1	c.4964_4982delCTGGCCTGACCCCAGAAGA	Alsop	Ovarian	4964
AOCS-131	BRCA1	c.4964_4982del	Patch	Ovarian	4964
GeparSixto_18-1	BRCA1	c.4986+3G>C	GeparSixto	Breast	4986
MB-6248	BRCA1	c.4987-1G>T	Breast Cancer (METABRIC, Nature 2012 & Nat Commun 2016)	Breast	4987
MB-6098	BRCA1	c.5074G>A	Breast Cancer (METABRIC, Nature 2012 & Nat Commun 2016)	Breast	5074
Alsop_76	BRCA1	c.5074+1G>T	Alsop	Ovarian	5074
Lin_27	BRCA1	c.5074G>A	Lin	Ovarian	5074
Lin_74	BRCA1	c.5075-2_5079del7	Lin	Ovarian	5075
Alsop_77	BRCA1	c.5095C>T	Alsop	Ovarian	5095
GeparSixto_19-1	BRCA1	c.5096G>A	GeparSixto	Breast	5096
GeparSixto_20-1	BRCA1	c.5109T>G	GeparSixto	Breast	5109
Lin_8	BRCA1	c.5135G>A	Lin	Ovarian	5135
150	BRCA1	c.5137del	Tung	Breast	5137
Song_63	BRCA1	c.5152+5G>T	Song	Ovarian	5152
Song_64	BRCA1	c.5153G>A	Song	Ovarian	5153
Lin_17	BRCA1	c.5153-1G>A	Lin	Ovarian	5153
Lin_37	BRCA1	c.5161C>T	Lin	Ovarian	5161
Lin_99	BRCA1	c.5161_5164delCAGT	Lin	Ovarian	5161
501	BRCA1	c.5172dupA	Tung	Breast	5172
650	BRCA1	c.5177_5180del	Tung	Breast	5177
Song_65	BRCA1	c.5177_5180delGAAA	Song	Ovarian	5177
GeparSixto_21-1	BRCA1	c.5177_5180del	GeparSixto	Breast	5177
GeparSixto_22-1	BRCA1	c.5179A>T	GeparSixto	Breast	5179
MTS-T0196	BRCA1	c.5193+1G>C	Breast Cancer (METABRIC, Nature 2012 & Nat Commun 2016)	Breast	5193
PRAD-01115342-Tumor-SM-6VZ7L	BRCA1	c.5207T>C	Metastatic Prostate Adenocarcinoma (SU2C/PCF Dream Team, PNAS 2019)	Prostate	5207
256	BRCA1	c.5251C>T	Tung	Breast	5251
617	BRCA1	c.5251C>T	Tung	Breast	5251
Lin_95	BRCA1	c.5263_5264insC	Lin	Ovarian	5263
Lin_11	BRCA1	c.5263_5264insC	Lin	Ovarian	5263
Lin_25	BRCA1	c.5263_5264insC	Lin	Ovarian	5263
Lin_68	BRCA1	c.5263_5264insC	Lin	Ovarian	5263
Lin_101	BRCA1	c.5263_5264insC	Lin	Ovarian	5263
MO_1232-Tumor	BRCA1	c.5266dupC	Metastatic Prostate Adenocarcinoma (SU2C/PCF Dream Team, PNAS 2019)	Prostate	5266
PRAD-6115388.0-Tumor-SM-7LGUA	BRCA1	c.5266dupC	Metastatic Prostate Adenocarcinoma (SU2C/PCF Dream Team, PNAS 2019)	Prostate	5266
SC_9137_Tumor	BRCA1	c.5266dupC	Metastatic Prostate Adenocarcinoma (SU2C/PCF Dream Team, PNAS 2019)	Prostate	5266
317	BRCA1	c.5266dupC	Tung	Breast	5266
379	BRCA1	c.5266dupC	Tung	Breast	5266
396	BRCA1	c.5266dupC	Tung	Breast	5266
498	BRCA1	c.5266dupC	Tung	Breast	5266
692	BRCA1	c.5266dupC	Tung	Breast	5266
743	BRCA1	c.5266dupC	Tung	Breast	5266
Alsop_80	BRCA1	c.5266dupC	Alsop	Ovarian	5266
Alsop_81	BRCA1	c.5266dupC	Alsop	Ovarian	5266
Alsop_82	BRCA1	c.5266dupC	Alsop	Ovarian	5266
Alsop_83	BRCA1	c.5266dupC	Alsop	Ovarian	5266
Alsop_84	BRCA1	c.5266dupC	Alsop	Ovarian	5266
Alsop_85	BRCA1	c.5266dupC	Alsop	Ovarian	5266
Alsop_86	BRCA1	c.5266dupC	Alsop	Ovarian	5266
Alsop_87	BRCA1	c.5266dupC	Alsop	Ovarian	5266
Song_66	BRCA1	c.5266dupC	Song	Ovarian	5266
Song_67	BRCA1	c.5266dupC	Song	Ovarian	5266
Song_68	BRCA1	c.5266dupC	Song	Ovarian	5266
Song_69	BRCA1	c.5266dupC	Song	Ovarian	5266
Song_70	BRCA1	c.5266dupC	Song	Ovarian	5266
AOCS-088¬∂	BRCA1	c.5266_5267insC	Patch	Ovarian	5266
AOCS-150	BRCA1	c.5266_5267insC	Patch	Ovarian	5266
Yap_BRCA_13	BRCA1	c.5266insC	Yap	Ovarian	5266
GeparSixto_23-1	BRCA1	c.5266dup	GeparSixto	Breast	5266
GeparSixto_23-2	BRCA1	c.5266dup	GeparSixto	Breast	5266
GeparSixto_23-3	BRCA1	c.5266dup	GeparSixto	Breast	5266
GeparSixto_23-4	BRCA1	c.5266dup	GeparSixto	Breast	5266
GeparSixto_23-5	BRCA1	c.5266dup	GeparSixto	Breast	5266
GeparSixto_23-6	BRCA1	c.5266dup	GeparSixto	Breast	5266
GeparSixto_23-7	BRCA1	c.5266dup	GeparSixto	Breast	5266
GeparSixto_23-8	BRCA1	c.5266dup	GeparSixto	Breast	5266
GeparSixto_23-9	BRCA1	c.5266dup	GeparSixto	Breast	5266
GeparSixto_23-10	BRCA1	c.5266dup	GeparSixto	Breast	5266
GeparSixto_23-11	BRCA1	c.5266dup	GeparSixto	Breast	5266
PD4093a	BRCA1	c.5277+1G>A	Breast Invasive Carcinoma (Sanger, Nature 2012)	Breast	5277
MB-4660	BRCA1	c.5278-2A>G	Breast Cancer (METABRIC, Nature 2012 & Nat Commun 2016)	Breast	5278
845	BRCA1	c.5278-1G>T	Tung	Breast	5278
GeparSixto_24-1	BRCA1	c.5309G>T	GeparSixto	Breast	5309
Lin_28	BRCA1	c.5332+1G>C	Lin	Ovarian	5332
43	BRCA1	c.5346G>A	Tung	Breast	5346
Lin_6	BRCA1	c.5346G>A	Lin	Ovarian	5346
TCGA-AN-A0XU-01	BRCA1	c.5363G>T	Breast Invasive Carcinoma (TCGA, Cell 2015)	Breast	5363
AOCS-152	BRCA1	c.5380G>T	Patch	Ovarian	5380
Lin_20	BRCA1	c.5444G>A	Lin	Ovarian	5444
Lin_81	BRCA1	c.5449G>T	Lin	Ovarian	5449
Lin_29	BRCA1	c.5467+1G>A	Lin	Ovarian	5467
MBC-MBCProject_zatdFvhp-Tumor-SM-GQAAR	BRCA1	c.5468-2A>G	The Metastatic Breast Cancer Project (Provisional, October 2018)	Breast	5468
TCGA-13-0730-01	BRCA1	c.5503C>T	Ovarian Serous Cystadenocarcinoma (TCGA, Provisional)	Ovarian	5503
Alsop_88	BRCA1	c.5503C>T	Alsop	Ovarian	5503
Song_71	BRCA1	c.5503C>T	Song	Ovarian	5503
Song_72	BRCA1	c.5503C>T	Song	Ovarian	5503
Castro_11-1	BRCA1	c.5503C>T	Castro	Prostate	5503
Lin_106	BRCA1	c.5510G>A	Lin	Ovarian	5510
Lin_89	BRCA1	c.5511G>A	Lin	Ovarian	5511
870	BRCA1	c.5558dupA	Tung	Breast	5558
Song_73	BRCA1	c.5558dupA	Song	Ovarian	5558
Yap_BRCA_17	BRCA1	c.5571_5579delGATCCCCCA	Yap	Ovarian	5571
AOCS-092	BRCA1	c.-414514_*710047del	Patch	Ovarian	414514
578	BRCA1	del 2-13	Tung	Breast	NA
Alsop_12	BRCA1	del254-331	Alsop	Ovarian	NA
AOCS-155	BRCA2	c.3G>A	Patch	Ovarian	3
P-0016773-T01-IM6	BRCA2	c.10G>T	Breast Cancer (MSK, Cancer Cell 2018)	Breast	10
Song_74	BRCA2	c.22_23delAG	Song	Ovarian	22
Alsop_90	BRCA2	c.26delC	Alsop	Ovarian	26
Alsop_91	BRCA2	c.26delC	Alsop	Ovarian	26
Yap_BRCA_14	BRCA2	c.26delC	Yap	Ovarian	26
516	BRCA2	c.110C>G	Tung	Breast	110
PRAD-01115531-Tumor-SM-A4KNG	BRCA2	c.145G>T	Metastatic Prostate Adenocarcinoma (SU2C/PCF Dream Team, PNAS 2019)	Prostate	145
P-0005900-T01-IM5	BRCA2	c.217C>T	Breast Cancer (MSK, Cancer Cell 2018)	Breast	217
Lin_71	BRCA2	c.262_263delCT	Lin	Ovarian	262
460	BRCA2	c.267_268del	Tung	Breast	267
Song_75	BRCA2	c.379delG	Song	Ovarian	379
484	BRCA2	c.414T>A	Tung	Breast	414
Lin_56	BRCA2	c.476-2A>G	Lin	Ovarian	476
887	BRCA2	c.486del	Tung	Breast	486
257	BRCA2	c.489_490insG	Tung	Breast	489
Song_76	BRCA2	c.517-2A>G	Song	Ovarian	517
Yap_BRCA_20	BRCA2	c.517-2A>G Splice	Yap	Ovarian	517
234	BRCA2	c.574_575del	Tung	Breast	574
665	BRCA2	c.574_575del	Tung	Breast	574
739	BRCA2	c.631+2T>C	Tung	Breast	631
312	BRCA2	c.658_659del	Tung	Breast	658
Alsop_92	BRCA2	c.658_659delGT	Alsop	Ovarian	658
Alsop_93	BRCA2	c.658_659delGT	Alsop	Ovarian	658
Song_77	BRCA2	c.658_659delGT	Song	Ovarian	658
Lin_52	BRCA2	c.658_659delGT	Lin	Ovarian	658
Lin_14	BRCA2	c.658_659delGT	Lin	Ovarian	658
255	BRCA2	c.748del	Tung	Breast	748
Yap_BRCA_11	BRCA2	c.751_754delACAG	Yap	Breast	751
Song_78	BRCA2	c.754_757delGACA	Song	Ovarian	754
Alsop_94	BRCA2	c.755_758delACAG	Alsop	Ovarian	755
Alsop_95	BRCA2	c.755_758delACAG	Alsop	Ovarian	755
Castro_12-1	BRCA2	c.755_758delACAG	Castro	Prostate	755
AOCS-167¬∂	BRCA2	c.767_771del	Patch	Ovarian	767
Song_79	BRCA2	c.1029delA	Song	Ovarian	1029
Song_80	BRCA2	c.1029delA	Song	Ovarian	1029
Castro_13-1	BRCA2	c.1231delA	Castro	Prostate	1231
Yap_BRCA_15	BRCA2	c.1261C>T	Yap	Ovarian	1261
Lin_80	BRCA2	c.1261C>T	Lin	Ovarian	1261
Song_81	BRCA2	c.1265delA	Song	Ovarian	1265
Castro_14-1	BRCA2	c.1265delA	Castro	Prostate	1265
P-0008215-T01-IM5	BRCA2	c.1310_1313delAAGA	Breast Cancer (MSK, Cancer Cell 2018)	Breast	1310
PROS01448-6115235-Tumor-SM-67ERY	BRCA2	c.1310_1313delAAGA	Metastatic Prostate Adenocarcinoma (SU2C/PCF Dream Team, PNAS 2019)	Prostate	1310
Lin_40	BRCA2	c.1321_1324delACTT	Lin	Ovarian	1321
Alsop_96	BRCA2	c.1453delG	Alsop	Ovarian	1453
SC_9021-Tumor	BRCA2	c.1454delA	Metastatic Prostate Adenocarcinoma (SU2C/PCF Dream Team, PNAS 2019)	Prostate	1454
488	BRCA2	c.1511_1512del	Tung	Breast	1511
Lin_44	BRCA2	c.1561delT	Lin	Ovarian	1561
GeparSixto_25-1	BRCA2	c.1608_1609del	GeparSixto	Breast	1608
Alsop_97	BRCA2	c.1617delAG	Alsop	Ovarian	1617
Lin_58	BRCA2	c.1672_1672delA	Lin	Ovarian	1672
402	BRCA2	c.1755_1759del	Tung	Breast	1755
Castro_15-1	BRCA2	c.1787delATGAAACATCTTAA	Castro	Prostate	1787
TCGA-E2-A14W-01	BRCA2	c.1796_1800delCTTAT	Breast Invasive Carcinoma (TCGA, Cell 2015)	Breast	1796
GeparSixto_26-1	BRCA2	c.1796_1800del	GeparSixto	Breast	1796
395	BRCA2	c.1813dupA	Tung	Breast	1813
403	BRCA2	c.1813dupA	Tung	Breast	1813
839	BRCA2	c.1813dupA	Tung	Breast	1813
Alsop_98	BRCA2	c.1813dupA	Alsop	Ovarian	1813
Alsop_99	BRCA2	c.1813dupA	Alsop	Ovarian	1813
Castro_16-1	BRCA2	c.1813insA	Castro	Prostate	1813
Song_82	BRCA2	c.1875_1876delTT	Song	Ovarian	1875
473	BRCA2	c.1929del	Tung	Breast	1929
Castro_17-1	BRCA2	c.1929delG	Castro	Prostate	1929
MBC_45	BRCA2	c.1960G>T	Metastatic Breast Cancer (INSERM, PLoS Med 2016)	Breast	1960
PRAD-6115250.0-Tumor-SM-B2XRX	BRCA2	c.2094delA	Metastatic Prostate Adenocarcinoma (SU2C/PCF Dream Team, PNAS 2019)	Prostate	2094
PROS01448-6115250-Tumor-SM-67ES5	BRCA2	c.2094delA	Metastatic Prostate Adenocarcinoma (SU2C/PCF Dream Team, PNAS 2019)	Prostate	2094
TCGA-04-1331-01	BRCA2	c.2133C>A	Ovarian Serous Cystadenocarcinoma (TCGA, Provisional)	Ovarian	2133
Lin_77	BRCA2	c.2246_2261delGTGATACTGACTTTCA	Lin	Ovarian	2246
841	BRCA2	c.2312T>G	Tung	Breast	2312
Alsop_111	BRCA2	c.2330_2331insA	Alsop	Ovarian	2330
Alsop_112	BRCA2	c.2330dupA	Alsop	Ovarian	2330
Song_83	BRCA2	c.2330dupA	Song	Ovarian	2330
Alsop_108	BRCA2	c.2409T>G	Alsop	Ovarian	2409
720	BRCA2	c.2426T>G	Tung	Breast	2426
Alsop_113	BRCA2	c.2456delA	Alsop	Ovarian	2456
Castro_18-1	BRCA2	c.2558insA	Castro	Prostate	2558
Song_84	BRCA2	c.2588dupA	Song	Ovarian	2588
TP_2009-Tumor	BRCA2	c.2653_2656delGACA	Metastatic Prostate Adenocarcinoma (SU2C/PCF Dream Team, PNAS 2019)	Prostate	2653
Alsop_114	BRCA2	c.2758delC	Alsop	Ovarian	2758
Alsop_115	BRCA2	c.2760delC	Alsop	Ovarian	2760
394	BRCA2	c.2786del	Tung	Breast	2786
Castro_19-1	BRCA2	c.2807delAACA	Castro	Prostate	2807
WCM258_Z2	BRCA2	c.2808_2811delACAA	Metastatic Prostate Adenocarcinoma (SU2C/PCF Dream Team, PNAS 2019)	Prostate	2808
643	BRCA2	c.2808_2811del	Tung	Breast	2808
689	BRCA2	c.2808del	Tung	Breast	2808
Song_85	BRCA2	c.2808_2811delACAA	Song	Ovarian	2808
Song_86	BRCA2	c.2808_2811delACAA	Song	Ovarian	2808
Song_87	BRCA2	c.2808_2811delACAA	Song	Ovarian	2808
Lin_57	BRCA2	c.2808_2811delACAA	Lin	Ovarian	2808
Lin_69	BRCA2	c.2830A>T	Lin	Ovarian	2830
Alsop_116	BRCA2	c.2834_2835delAA	Alsop	Ovarian	2834
Castro_20-1	BRCA2	c.2836delGA	Castro	Prostate	2836
502	BRCA2	c.2860del	Tung	Breast	2860
Song_88	BRCA2	c.2899_2900delCT	Song	Ovarian	2899
Song_89	BRCA2	c.3070_3071delAT	Song	Ovarian	3070
559	BRCA2	c.3103G>T	Tung	Breast	3103
Alsop_109	BRCA2	c.3136G>T	Alsop	Ovarian	3136
Castro_21-1	BRCA2	c.3158T>G	Castro	Prostate	3158
193	BRCA2	c.3170_3174del	Tung	Breast	3170
247	BRCA2	c.3170_3174del	Tung	Breast	3170
340	BRCA2	c.3264dupT	Tung	Breast	3264
451	BRCA2	c.3264dupT	Tung	Breast	3264
Lin_73	BRCA2	c.3264_3265insT	Lin	Ovarian	3264
AOCS-149	BRCA2	c.3370C>T	Patch	Ovarian	3370
Song_90	BRCA2	c.3405C>A	Song	Ovarian	3405
Castro_22-1	BRCA2	c.3405C>A	Castro	Prostate	3405
Lin_41	BRCA2	c.3593_3593delA	Lin	Ovarian	3593
Song_91	BRCA2	c.3599_3600delGT	Song	Ovarian	3599
Song_92	BRCA2	c.3599_3600delGT	Song	Ovarian	3599
Song_93	BRCA2	c.3599_3600delGT	Song	Ovarian	3599
351	BRCA2	c.3680_3681del	Tung	Breast	3680
Alsop_117	BRCA2	c.3680_3681delTG	Alsop	Ovarian	3680
Song_94	BRCA2	c.3680_3681delTG	Song	Ovarian	3680
Song_95	BRCA2	c.3689delC	Song	Ovarian	3689
Song_96	BRCA2	c.3785C>G	Song	Ovarian	3785
Alsop_118	BRCA2	c.3847_3848delGT	Alsop	Ovarian	3847
Song_97	BRCA2	c.3847_3848delGT	Song	Ovarian	3847
Song_98	BRCA2	c.3847_3848delGT	Song	Ovarian	3847
Lin_31	BRCA2	c.3847_3848delGT	Lin	Ovarian	3847
Castro_23-1	BRCA2	c.3847delGT	Castro	Prostate	3847
Song_99	BRCA2	c.3865_3868delAAAT	Song	Ovarian	3865
Song_100	BRCA2	c.3873delA	Song	Ovarian	3873
WCM183_Z4	BRCA2	c.3922G>T	Metastatic Prostate Adenocarcinoma (SU2C/PCF Dream Team, PNAS 2019)	Prostate	3922
Lin_36	BRCA2	c.3978_3979insTGCT	Lin	Ovarian	3978
810	BRCA2	c.4058_4062del	Tung	Breast	4058
796	BRCA2	c.4103T>A	Tung	Breast	4103
Alsop_107	BRCA2	c.4111C>T	Alsop	Ovarian	4111
Song_101	BRCA2	c.4154C>G	Song	Ovarian	4154
Yap_25	BRCA2	c.4163_4164delCTinsA	Yap	Prostate	4163
Song_102	BRCA2	c.4211_4215delCAAAT	Song	Ovarian	4211
Song_103	BRCA2	c.4284dupT	Song	Ovarian	4284
Song_104	BRCA2	c.4284dupT	Song	Ovarian	4284
AOCS-063	BRCA2	c.4357A>T	Patch	Ovarian	4357
Alsop_101	BRCA2	c.4391delCTinsA	Alsop	Ovarian	4391
Song_105	BRCA2	c.4398_4402delACATT	Song	Ovarian	4398
Lin_19	BRCA2	c.4398_4402delACATT	Lin	Ovarian	4398
Lin_49	BRCA2	c.4405_4409delGACAT	Lin	Ovarian	4405
Lin_102	BRCA2	c.4449_4449delA	Lin	Ovarian	4449
GeparSixto_27-1	BRCA2	c.4449del	GeparSixto	Breast	4449
Song_106	BRCA2	c.4472_4475delTGAA	Song	Ovarian	4472
Song_107	BRCA2	c.4477_4480delGAAA	Song	Ovarian	4477
Song_108	BRCA2	c.4477_4480delGAAA	Song	Ovarian	4477
Song_109	BRCA2	c.4477_4480delGAAA	Song	Ovarian	4477
Song_110	BRCA2	c.4477_4480delGAAA	Song	Ovarian	4477
Song_111	BRCA2	c.4477_4480delGAAA	Song	Ovarian	4477
Song_112	BRCA2	c.4477_4480delGAAA	Song	Ovarian	4477
581	BRCA2	c.4478_4481del	Tung	Breast	4478
Alsop_119	BRCA2	c.4478_4481delAAAG	Alsop	Ovarian	4478
Castro_24-1	BRCA2	c.4478delAAAG	Castro	Prostate	4478
Castro_24-2	BRCA2	c.4478delAAAG	Castro	Prostate	4478
Lin_12	BRCA2	c.4552_4552delG	Lin	Ovarian	4552
Song_113	BRCA2	c.4576dupA	Song	Ovarian	4576
Alsop_102	BRCA2	c.4626delACATT	Alsop	Ovarian	4626
Alsop_120	BRCA2	c.4631_4632insA	Alsop	Ovarian	4631
Song_114	BRCA2	c.4631dupA	Song	Ovarian	4631
613	BRCA2	c.4638del	Tung	Breast	4638
441	BRCA2	c.4712_4713del	Tung	Breast	4712
499	BRCA2	c.4793del	Tung	Breast	4793
Alsop_103	BRCA2	c.4804dupA	Alsop	Ovarian	4804
Lin_76	BRCA2	c.4808_4808delA	Lin	Ovarian	4808
Yap_BRCA_16	BRCA2	c.4876_4877delAA	Yap	Ovarian	4876
Song_115	BRCA2	c.4877_4878delAA	Song	Ovarian	4877
Castro_25-1	BRCA2	c.4877delAA	Castro	Prostate	4877
Castro_25-2	BRCA2	c.4877delAA	Castro	Prostate	4877
P-0000438-T01-IM3	BRCA2	c.4889C>G	Breast Cancer (MSK, Cancer Cell 2018)	Breast	4889
Castro_26-1	BRCA2	c.4889C>G	Castro	Prostate	4889
Lin_109	BRCA2	c.4936_4939delGAAA	Lin	Ovarian	4936
491	BRCA2	c.4943del	Tung	Breast	4943
MTS-T1269	BRCA2	c.4965C>G	Breast Cancer (METABRIC, Nature 2012 & Nat Commun 2016)	Breast	4965
391	BRCA2	c.4965C>G	Tung	Breast	4965
Song_116	BRCA2	c.4965C>G	Song	Ovarian	4965
Castro_27-1	BRCA2	c.4965C>G	Castro	Prostate	4965
Castro_28-1	BRCA2	c.4981delT	Castro	Prostate	4981
Castro_28-2	BRCA2	c.4981delT	Castro	Prostate	4981
PROS01448-DFCI.10-448.P27-Tumor-SM-5CQ5J	BRCA2	c.4983T>G	Metastatic Prostate Adenocarcinoma (SU2C/PCF Dream Team, PNAS 2019)	Prostate	4983
380	BRCA2	c.5042_5043del	Tung	Breast	5042
Alsop_121	BRCA2	c.5042_5043delTG	Alsop	Ovarian	5042
Song_117	BRCA2	c.5073dupA	Song	Ovarian	5073
Lin_108	BRCA2	c.5130_5133delTGTA	Lin	Ovarian	5130
751	BRCA2	c.5158dupT	Tung	Breast	5158
Lin_53	BRCA2	c.5164_5165delAG	Lin	Ovarian	5164
Song_118	BRCA2	c.5213_5216delCTTA	Song	Ovarian	5213
583	BRCA2	c.5217_5223del	Tung	Breast	5217
544	BRCA2	c.5238dupT	Tung	Breast	5238
Song_119	BRCA2	c.5238dupT	Song	Ovarian	5238
Song_120	BRCA2	c.5290_5291delTC	Song	Ovarian	5290
Castro_29-1	BRCA2	c.5303delTT	Castro	Prostate	5303
Song_121	BRCA2	c.5304_5305delTT	Song	Ovarian	5304
557	BRCA2	c.5350_5351del	Tung	Breast	5350
Alsop_100	BRCA2	c.5350_5351delAA	Alsop	Ovarian	5350
Lin_88	BRCA2	c.5350_5351delAA	Lin	Ovarian	5350
Castro_30-1	BRCA2	c.5350_5351delAA	Castro	Prostate	5350
ICGC_0006	BRCA2	c.5351dupA	Pancreatic Adenocarcinoma (QCMG, Nature 2016)	Pancreas	5351
194	BRCA2	c.5351dupA	Tung	Breast	5351
Song_122	BRCA2	c.5351_5352delAA	Song	Ovarian	5351
Song_123	BRCA2	c.5351_5352delAA	Song	Ovarian	5351
Song_124	BRCA2	c.5351_5352delAA	Song	Ovarian	5351
Song_125	BRCA2	c.5351_5352delAA	Song	Ovarian	5351
Alsop_104	BRCA2	c.5531delTT	Alsop	Ovarian	5531
584	BRCA2	c.5542del	Tung	Breast	5542
439	BRCA2	c.5576_5579del	Tung	Breast	5576
Alsop_122	BRCA2	c.5576_5579delTTAA	Alsop	Ovarian	5576
Song_126	BRCA2	c.5576_5579delTTAA	Song	Ovarian	5576
PROS11496-6115288-Tumor-SM-6CNQ1	BRCA2	c.5578A>T	Metastatic Prostate Adenocarcinoma (SU2C/PCF Dream Team, PNAS 2019)	Prostate	5578
154	BRCA2	c.5585_5588del	Tung	Breast	5585
P-0006568-T01-IM5	BRCA2	c.5603_5606delACAG	Breast Cancer (MSK, Cancer Cell 2018)	Breast	5603
Lin_83	BRCA2	c.5614A>T	Lin	Ovarian	5614
SC_9165_Tumor	BRCA2	c.5645C>A	Metastatic Prostate Adenocarcinoma (SU2C/PCF Dream Team, PNAS 2019)	Prostate	5645
TCGA-09-2050-01	BRCA2	c.5645C>A	Ovarian Serous Cystadenocarcinoma (TCGA, Provisional)	Ovarian	5645
TP_2054-TM	BRCA2	c.5645C>A	Metastatic Prostate Adenocarcinoma (SU2C/PCF Dream Team, PNAS 2019)	Prostate	5645
611	BRCA2	c.5645C>A	Tung	Breast	5645
Castro_31-1	BRCA2	c.5645C>CA	Castro	Prostate	5645
GeparSixto_28-1	BRCA2	c.5645C>A	GeparSixto	Breast	5645
624	BRCA2	c.5655C>A	Tung	Breast	5655
Alsop_123	BRCA2	c.5682C>G	Alsop	Ovarian	5682
Song_127	BRCA2	c.5682C>G	Song	Ovarian	5682
Castro_32-1	BRCA2	c.5682C>G	Castro	Prostate	5682
Castro_32-2	BRCA2	c.5682C>G	Castro	Prostate	5682
Castro_32-3	BRCA2	c.5682C>G	Castro	Prostate	5682
535	BRCA2	c.5851_5854dupAGTT	Tung	Breast	5851
587	BRCA2	c.5851_5854del	Tung	Breast	5851
P-0016773-T01-IM6	BRCA2	c.5855T>A	Breast Cancer (MSK, Cancer Cell 2018)	Breast	5855
GeparSixto_29-1	BRCA2	c.5857G>T	GeparSixto	Breast	5857
SC_9090_T	BRCA2	c.5864C>A	Metastatic Prostate Adenocarcinoma (SU2C/PCF Dream Team, PNAS 2019)	Prostate	5864
552	BRCA2	c.5864C>A	Tung	Breast	5864
Song_128	BRCA2	c.5864C>A	Song	Ovarian	5864
Song_129	BRCA2	c.5909C>A	Song	Ovarian	5909
Song_130	BRCA2	c.5909C>A	Song	Ovarian	5909
Song_131	BRCA2	c.5909C>A	Song	Ovarian	5909
232	BRCA2	c.5925T>A	Tung	Breast	5925
P-0000584-T01-IM3	BRCA2	c.5946delT	Breast Cancer (MSK, Cancer Cell 2018)	Breast	5946
P-0001308-T01-IM3	BRCA2	c.5946delT	Breast Cancer (MSK, Cancer Cell 2018)	Breast	5946
SC_9022-Tumor	BRCA2	c.5946delT	Metastatic Prostate Adenocarcinoma (SU2C/PCF Dream Team, PNAS 2019)	Prostate	5946
744	BRCA2	c.5946del	Tung	Breast	5946
Alsop_124	BRCA2	c.5946delT	Alsop	Ovarian	5946
Alsop_125	BRCA2	c.5946delT	Alsop	Ovarian	5946
Alsop_126	BRCA2	c.5946delT	Alsop	Ovarian	5946
Yap_BRCA_7	BRCA2	c.5946delT	Yap	Prostate	5946
Yap_BRCA_8	BRCA2	c.5946delT	Yap	Breast	5946
Lin_82	BRCA2	c.5946_5946delT	Lin	Ovarian	5946
Lin_110	BRCA2	c.5946_5946delT	Lin	Ovarian	5946
Castro_33-1	BRCA2	c.5946delT	Castro	Prostate	5946
Castro_33-2	BRCA2	c.5946delT	Castro	Prostate	5946
TP_2069_Tumor	BRCA2	c.5980C>T	Metastatic Prostate Adenocarcinoma (SU2C/PCF Dream Team, PNAS 2019)	Prostate	5980
Song_132	BRCA2	c.6037A>T	Song	Ovarian	6037
Song_133	BRCA2	c.6052_6053delAG	Song	Ovarian	6052
Lin_39	BRCA2	c.6065C>G	Lin	Ovarian	6065
Song_134	BRCA2	c.6079dupA	Song	Ovarian	6079
543	BRCA2	c.6124C>T	Tung	Breast	6124
Lin_84	BRCA2	c.6136_6136delT	Lin	Ovarian	6136
P-0004824-T01-IM5	BRCA2	c.6155C>A	Breast Cancer (MSK, Cancer Cell 2018)	Breast	6155
Castro_34-1	BRCA2	c.6155C>G	Castro	Prostate	6155
Lin_66	BRCA2	c.6209_6212delAAAG	Lin	Ovarian	6209
378	BRCA2	c.6275_6276del	Tung	Breast	6275
Alsop_127	BRCA2	c.6275_6276delTT	Alsop	Ovarian	6275
Alsop_128	BRCA2	c.6275-6276delTT	Alsop	Ovarian	6275
Alsop_129	BRCA2	c.6275-6276delTT	Alsop	Ovarian	6275
Yap_BRCA_22	BRCA2	c.6275_6276delTT	Yap	Ovarian	6275
Castro_35-1	BRCA2	c.6275_6276delTT	Castro	Prostate	6275
Castro_35-2	BRCA2	c.6275_6276delTT	Castro	Prostate	6275
Castro_35-3	BRCA2	c.6275_6276delTT	Castro	Prostate	6275
Castro_35-4	BRCA2	c.6275_6276delTT	Castro	Prostate	6275
Song_135	BRCA2	c.6276_6277delTT	Song	Ovarian	6276
Song_136	BRCA2	c.6276_6277delTT	Song	Ovarian	6276
Song_137	BRCA2	c.6276_6277delTT	Song	Ovarian	6276
Song_138	BRCA2	c.6276_6277delTT	Song	Ovarian	6276
249	BRCA2	c.6320del	Tung	Breast	6320
AOCS-122	BRCA2	c.6346_6358del	Patch	Ovarian	6346
Castro_36-1	BRCA2	c.6405delCTTAA	Castro	Prostate	6405
Castro_36-2	BRCA2	c.6405delCTTAA	Castro	Prostate	6405
27	BRCA2	c.6451del	Tung	Breast	6451
SC_9097-TM	BRCA2	c.6468_6469delTC	Metastatic Prostate Adenocarcinoma (SU2C/PCF Dream Team, PNAS 2019)	Prostate	6468
314	BRCA2	c.6486_6489del	Tung	Breast	6486
Alsop_110	BRCA2	c.6486_6489delACAA	Alsop	Ovarian	6486
Alsop_130	BRCA2	c.6486_6489delACAA	Alsop	Ovarian	6486
Castro_38-1	BRCA2	c.6486_6489delACAA	Castro	Prostate	6486
444	BRCA2	c.6590_6593del	Tung	Breast	6590
Castro_37-1	BRCA2	c.6591_6592delTG	Castro	Prostate	6591
Lin_32	BRCA2	c.6600_6601delTT	Lin	Ovarian	6600
Song_139	BRCA2	c.6624delT	Song	Ovarian	6624
Alsop_131	BRCA2	c.6675delA	Alsop	Ovarian	6675
Song_140	BRCA2	c.6719delT	Song	Ovarian	6719
Song_141	BRCA2	c.6815_6816delGA	Song	Ovarian	6815
Alsop_105	BRCA2	c.6871delT	Alsop	Ovarian	6871
GeparSixto_30-1	BRCA2	c.6937+2T>G	GeparSixto	Breast	6937
Yap_BRCA_5	BRCA2	c.6952C>T	Yap	Ovarian	6952
Alsop_106	BRCA2	c.6989_delTT	Alsop	Ovarian	6989
586	BRCA2	c.7007G>A	Tung	Breast	7007
57	BRCA2	c.7069_7070del	Tung	Breast	7069
Alsop_132	BRCA2	c.7069_7070delCT	Alsop	Ovarian	7069
Song_142	BRCA2	c.7069_7070delCT	Song	Ovarian	7069
Song_143	BRCA2	c.7069_7070delCT	Song	Ovarian	7069
Song_144	BRCA2	c.7069_7070delCT	Song	Ovarian	7069
Song_145	BRCA2	c.7069_7070delCT	Song	Ovarian	7069
Song_146	BRCA2	c.7069_7070delCT	Song	Ovarian	7069
Song_147	BRCA2	c.7069_7070delCT	Song	Ovarian	7069
Castro_39-1	BRCA2	c.7084delAAAAG	Castro	Prostate	7084
TCGA-13-0726-01	BRCA2	c.7180A>T	Ovarian Serous Cystadenocarcinoma (TCGA, Provisional)	Ovarian	7180
125	BRCA2	c.7259_7265del	Tung	Breast	7259
ICGC_0291	BRCA2	c.7283T>A	Pancreatic Adenocarcinoma (QCMG, Nature 2016)	Pancreas	7283
Song_148	BRCA2	c.7312delG	Song	Ovarian	7312
SC_9082-TM	BRCA2	c.7355delA	Metastatic Prostate Adenocarcinoma (SU2C/PCF Dream Team, PNAS 2019)	Prostate	7355
832	BRCA2	c.7414_7415del	Tung	Breast	7414
Song_149	BRCA2	c.7425delA	Song	Ovarian	7425
Lin_62	BRCA2	c.7435+1G>C	Lin	Ovarian	7435
Song_150	BRCA2	c.7480C>T	Song	Ovarian	7480
Lin_22	BRCA2	c.7480C>T	Lin	Ovarian	7480
450	BRCA2	c.7501C>T	Tung	Breast	7501
Castro_40-1	BRCA2	c.7543dupA	Castro	Prostate	7543
Castro_40-2	BRCA2	c.7543dupA	Castro	Prostate	7543
525	BRCA2	c.7558C>T	Tung	Breast	7558
Lin_54	BRCA2	c.7558C>T	Lin	Ovarian	7558
Lin_111	BRCA2	c.7558C>T	Lin	Ovarian	7558
Song_151	BRCA2	c.7566_7567delTC	Song	Ovarian	7566
Yap_BRCA_1	BRCA2	c.7610_7611delAT	Yap	Prostate	7610
Alsop_135	BRCA2	c.7757G>A	Alsop	Ovarian	7757
Castro_41-1	BRCA2	c.7757G>A	Castro	Prostate	7757
Song_152	BRCA2	c.7762delA	Song	Ovarian	7762
Song_153	BRCA2	c.7762delA	Song	Ovarian	7762
Castro_42-1	BRCA2	c.7771insA	Castro	Prostate	7771
Castro_42-2	BRCA2	c.7771insA	Castro	Prostate	7771
TCGA-A8-A08L-01	BRCA2	c.7805+1G>A	Breast Invasive Carcinoma (TCGA, Cell 2015)	Breast	7805
644	BRCA2	c.7806-2A>G	Tung	Breast	7806
858	BRCA2	c.7865A>G	Tung	Breast	7865
Song_154	BRCA2	c.7934delG	Song	Ovarian	7934
Castro_43-1	BRCA2	c.7966C>T	Castro	Prostate	7966
P-0008049-T01-IM5	BRCA2	c.7976+1G>A	Breast Cancer (MSK, Cancer Cell 2018)	Breast	7976
567	BRCA2	c.7976G>A	Tung	Breast	7976
Song_155	BRCA2	c.7976+5G>C	Song	Ovarian	7976
P-0006335-T01-IM5	BRCA2	c.7977-1G>A	Breast Cancer (MSK, Cancer Cell 2018)	Breast	7977
Yap_BRCA_1	BRCA2	c.7977-3_7977-2delinsAG	Yap	Prostate	7977
Castro_44-1	BRCA2	c.7977-1G>C	Castro	Prostate	7977
Castro_44-2	BRCA2	c.7977-1G>C	Castro	Prostate	7977
Castro_44-3	BRCA2	c.7977-1G>C	Castro	Prostate	7977
625	BRCA2	c.7984dupA	Tung	Breast	7984
05-165O_ADRENAL	BRCA2	c.8021delA	Prostate Adenocarcinoma (MSKCC/DFCI, Nature Genetics 2018)	Prostate	8021
SC_9150_Tumor	BRCA2	c.8021delA	Metastatic Prostate Adenocarcinoma (SU2C/PCF Dream Team, PNAS 2019)	Prostate	8021
TCGA-FB-AAPU-01	BRCA2	c.8145delA	Pancreatic Adenocarcinoma (TCGA, Provisional)	Pancreas	8145
589	BRCA2	c.8167G>C	Tung	Breast	8167
Lin_7	BRCA2	c.8167G>C	Lin	Ovarian	8167
Castro_45-1	BRCA2	c.8167G>C	Castro	Prostate	8167
335	BRCA2	c.8175del	Tung	Breast	8175
325	BRCA2	c.8188G>C	Tung	Breast	8188
Lin_45	BRCA2	c.8229_8229delC	Lin	Ovarian	8229
Castro_46-1	BRCA2	c.8297delC	Castro	Prostate	8297
Castro_46-2	BRCA2	c.8297delC	Castro	Prostate	8297
437	BRCA2	c.8331+2T>C	Tung	Breast	8331
Song_156	BRCA2	c.8331+2T>C	Song	Ovarian	8331
SA072	BRCA2	c.8504C>A	Breast Invasive Carcinoma (British Columbia, Nature 2012)	Breast	8504
Lin_85	BRCA2	c.8535_8538delAGAG	Lin	Ovarian	8535
528	BRCA2	c.8537_8538del	Tung	Breast	8537
Lin_97	BRCA2	c.8566G>T	Lin	Ovarian	8566
770	BRCA2	c.8585dupT	Tung	Breast	8585
Song_157	BRCA2	c.8633_8634delAA	Song	Ovarian	8633
Song_158	BRCA2	c.8633_8634delAA	Song	Ovarian	8633
605	BRCA2	c.8869C>T	Tung	Breast	8869
253	BRCA2	c.8878C>T	Tung	Breast	8878
470	BRCA2	c.8904del	Tung	Breast	8904
Alsop_136	BRCA2	c.8904delC	Alsop	Ovarian	8904
Castro_47-1	BRCA2	c.8904delC	Castro	Prostate	8904
Castro_47-2	BRCA2	c.8904delC	Castro	Prostate	8904
Lin_38	BRCA2	c.8924_8924delT	Lin	Ovarian	8924
P-0005205-T02-IM6	BRCA2	c.8933C>A	Breast Cancer (MSK, Cancer Cell 2018)	Breast	8933
Alsop_137	BRCA2	c.8985_8986insAGAT	Alsop	Ovarian	8985
P-0017930-T01-IM6	BRCA2	c.9004G>A	Breast Cancer (MSK, Cancer Cell 2018)	Breast	9004
Lin_98	BRCA2	c.9076C>T	Lin	Ovarian	9076
PRAD-01115468-Tumor-SM-6B2KE	BRCA2	c.9097delA	Metastatic Prostate Adenocarcinoma (SU2C/PCF Dream Team, PNAS 2019)	Prostate	9097
356	BRCA2	c.9097dupA	Tung	Breast	9097
Lin_86	BRCA2	c.9097_9098insA	Lin	Ovarian	9097
Castro_48-1	BRCA2	c.9097dupA	Castro	Prostate	9097
MTS-T0697	BRCA2	c.9106C>T	Breast Cancer (METABRIC, Nature 2012 & Nat Commun 2016)	Breast	9106
616	BRCA2	c.9117G>A	Tung	Breast	9117
MO_1514_T	BRCA2	c.9154C>T	Metastatic Prostate Adenocarcinoma (SU2C/PCF Dream Team, PNAS 2019)	Prostate	9154
181	BRCA2	c.9182T>A	Tung	Breast	9182
MB-5646	BRCA2	c.9196C>T	Breast Cancer (METABRIC, Nature 2012 & Nat Commun 2016)	Breast	9196
Song_159	BRCA2	c.9196C>T	Song	Ovarian	9196
SC_9027-Tumor	BRCA2	c.9253dupA	Metastatic Prostate Adenocarcinoma (SU2C/PCF Dream Team, PNAS 2019)	Prostate	9253
SC_9145_Tumor	BRCA2	c.9253dupA	Metastatic Prostate Adenocarcinoma (SU2C/PCF Dream Team, PNAS 2019)	Prostate	9253
SC_9183_T	BRCA2	c.9253delA	Metastatic Prostate Adenocarcinoma (SU2C/PCF Dream Team, PNAS 2019)	Prostate	9253
14	BRCA2	c.9253dupA	Tung	Breast	9253
599	BRCA2	c.9253dupA	Tung	Breast	9253
Yap_BRCA_4	BRCA2	c.9253dup	Yap	Ovarian	9253
Castro_49-1	BRCA2	c.9253insA	Castro	Prostate	9253
Castro_49-2	BRCA2	c.9253insA	Castro	Prostate	9253
P-0001308-T01-IM3	BRCA2	c.9284A>G	Breast Cancer (MSK, Cancer Cell 2018)	Breast	9284
795	BRCA2	c.9294C>G	Tung	Breast	9294
Song_160	BRCA2	c.9294C>G	Song	Ovarian	9294
Song_161	BRCA2	c.9294C>G	Song	Ovarian	9294
Castro_50-1	BRCA2	c.9294C>G	Castro	Prostate	9294
GeparSixto_31-1	BRCA2	c.9371A>T	GeparSixto	Breast	9371
786	BRCA2	c.9380G>A	Tung	Breast	9380
ICGC_0418	BRCA2	c.9382C>T	Pancreatic Adenocarcinoma (QCMG, Nature 2016)	Pancreas	9382
Song_162	BRCA2	c.9382C>T	Song	Ovarian	9382
Castro_51-1	BRCA2	c.9382C>T	Castro	Prostate	9382
Castro_51-2	BRCA2	c.9382C>T	Castro	Prostate	9382
Castro_51-3	BRCA2	c.9382C>T	Castro	Prostate	9382
Yap_BRCA_6	BRCA2	c.9433_9434delTG	Yap	Breast	9433
Song_163	BRCA2	c.9434_9435delTG	Song	Ovarian	9434
464	BRCA2	c.9435_9436del	Tung	Breast	9435
Alsop_139	BRCA2	c.9497insT	Alsop	Ovarian	9497
493	BRCA2	c.9573G>A	Tung	Breast	9573
Alsop_138	BRCA2	c.9610C>T	Alsop	Ovarian	9610
TCGA-A2-A0SU-01	BRCA2	c.9924C>G	Breast Invasive Carcinoma (TCGA, Cell 2015)	Breast	9924
Alsop_140	BRCA2	c.9924C>G	Alsop	Ovarian	9924
Song_164	BRCA2	c.10107dupT	Song	Ovarian	10107
Alsop_141	BRCA2	IVS17-1G>C	Alsop	Ovarian	NA
