# Supplementary material for: Clinical BRCA1/2 Reversion Analysis Identifies Hotspot Mutations and Predicted Neoantigens Associated with Therapy Resistance
Source: Oxford University Press journal article supplement (doi:10.1158/2159-8290.cd-19-1485), 2020-07-22
Supplement: 21598290cd191485-sup-234162_2_supp_6377364_qcdn6v.xlsx [file 21598290cd191485-sup-234162_2_supp_6377364_qcdn6v.xlsx]

## Sheet: Reversions_output
Supplementary Table 2 Full list of reversions analysed. Updates to this table will be made at reversions.icr.ac.uk
Case	Patient/Cell Line	Reference	Gene	Pathogenic	Reversion	Microhomology present	Microhomology	Distance to Pathogenic	Reversion type	Site	Setting	Drug	CDS Position	Material sequenced
Afghahi-Patient-1-1	Patient 1	Afghahi 2017	BRCA1	c.1360_1361delAG	c.1360_1401del42	Yes	AGA	0	Microhomology deletion	Breast	Patient	Platinum	1360	Tumour DNA
SUM149.B1.S*	SUM149	Drean 2017	BRCA1	c.2169delT	c.2169delT; 2175_2254del80	No		5	Deletion	Breast	Cell line	Olaparib and Talazoparib	2169	Cell line DNA
RR1	MDAMB436	Johnson 2013	BRCA1	c.5277+1G>A	Other	No		NA	Other	Breast	Cell line	Rucaparib	5277	Cell line DNA
RR2	MDAMB436	Johnson 2013	BRCA1	c.5277+1G>A	Other	No		NA	Other	Breast	Cell line	Rucaparib	5277	Cell line DNA
RR3	MDAMB436	Johnson 2013	BRCA1	c.5277+1G>A	Other	No		NA	Other	Breast	Cell line	Rucaparib	5277	Cell line DNA
RR4	MDAMB436	Johnson 2013	BRCA1	c.5277+1G>A	Other	No		NA	Other	Breast	Cell line	Rucaparib	5277	Cell line DNA
RR5	MDAMB436	Johnson 2013	BRCA1	c.5277+1G>A	Other	No		NA	Other	Breast	Cell line	Rucaparib	5277	Cell line DNA
RR6	MDAMB436	Johnson 2013	BRCA1	c.5277+1G>A	Other	No		NA	Other	Breast	Cell line	Rucaparib	5277	Cell line DNA
Kondrashova-1-1	Kondrashova-1	Kondrashova 2017	BRCA1	c.1175_1214del40	c.1129_1251del123	Yes	CTAAAT	0	Microhomology deletion	Ovarian	Patient	Platinum, rucaparib	1175	Tumour DNA
Kondrashova-3-1	Kondrashova-3	Kondrashova 2017	BRCA1	c.1892delT	c.1279_2139del	Yes	TTCA	0	Microhomology deletion	Ovarian	Patient	Platinum, rucaparib	1892	Tumour DNA
Kondrashova-4-1	Kondrashova-4	Kondrashova 2017	BRCA1	c.2043dupT	c.1835_1964del; 2043dupT	Yes	A	-78	Microhomology deletion	Ovarian	Patient	Platinum, rucaparib	2043	Tumour DNA
Kondrashova-4-2	Kondrashova-4	Kondrashova 2017	BRCA1	c.2043dupT	c.4096+1G>A	No		2052	Substitution	Ovarian	Patient	Platinum, rucaparib	2043	Tumour DNA
SubjectID_1-1	SubjectID_1	Lin 2018	BRCA1	c.1125delA	c.1125delA; 1159dupT	No		33	Insertion	Ovarian	Patient	Rucaparib	1125	ctDNA
SubjectID_1-2	SubjectID_1	Lin 2018	BRCA1	c.1125delA	c.1080_1108delCTCAGAGAATCCTAGAGATACTGAAGATG; 1125delA	Yes	ATG	-16	Microhomology deletion	Ovarian	Patient	Rucaparib	1125	ctDNA
SubjectID_2-1	SubjectID_2	Lin 2018	BRCA1	c.1045G>T	c.1045G>T; 1046A>G	No		0	Substitution	Ovarian	Patient	Platinum	1045	ctDNA
SubjectID_2-2	SubjectID_2	Lin 2018	BRCA1	c.1045G>T	c.1045G>T; 1047G>T	No		1	Substitution	Ovarian	Patient	Platinum	1045	Tumour DNA and ctDNA
SubjectID_2-3	SubjectID_2	Lin 2018	BRCA1	c.1045G>T	c.1039_1077delCTGTGTGAGAGAAAAGAATGGAATAAGCAGAAACTGCCA	No		0	Deletion	Ovarian	Patient	Platinum	1045	ctDNA
SubjectID_2-4	SubjectID_2	Lin 2018	BRCA1	c.1045G>T	c.1035_1055delTCCCCTGTGTGAGAGAAAAGA	No		0	Deletion	Ovarian	Patient	Platinum	1045	ctDNA
SubjectID_2-5	SubjectID_2	Lin 2018	BRCA1	c.1045G>T	c.1045G>T; 1047G>C	No		1	Substitution	Ovarian	Patient	Rucaparib	1045	ctDNA
SubjectID_2-6	SubjectID_2	Lin 2018	BRCA1	c.1045G>T	c.1045G>A	No		0	Substitution	Ovarian	Patient	Rucaparib	1045	ctDNA
SubjectID_43	SubjectID_43	Lin 2018	BRCA1	c.2560_2561dupGC	c.2624_2655delCAGGAAATGCAGAAGAGGAATGTGCAACATTC; 2560_2561dupGC	Yes	TC	62	Microhomology deletion	Ovarian	Patient	Rucaparib	2560	ctDNA
SubjectID_46	SubjectID_46	Lin 2018	BRCA1	c.68_69delAG	c.65_79delTAGAGTGTCCCATCT	Yes	ATCT	0	Microhomology deletion	Ovarian	Patient	Rucaparib	68	ctDNA
SubjectID_55	SubjectID_55	Lin 2018	BRCA1	c.3607C>T	c.3607C>T; 3608G>T	No		0	Substitution	Ovarian	Patient	Rucaparib	3607	ctDNA
SubjectID_63-1	SubjectID_63	Lin 2018	BRCA1	c.3034_3035delAG	c.2971_3001del31; 3034_3035delAG	Yes	AAAACT	-32	Microhomology deletion	Ovarian	Patient	Platinum	3034	Tumour DNA
SubjectID_63-2	SubjectID_63	Lin 2018	BRCA1	c.3034_3035delAG	c.2977_3035delinsTTGAGGAACATTCAATGTCACCTGAA	No		0	Deletion	Ovarian	Patient	Rucaparib	3034	ctDNA
SubjectID_63-3	SubjectID_63	Lin 2018	BRCA1	c.3034_3035delAG	c.3018_3059del42	No		0	Deletion	Ovarian	Patient	Rucaparib	3034	ctDNA
SubjectID_63-4	SubjectID_63	Lin 2018	BRCA1	c.3034_3035delAG	c.2284_3453del1170	No		0	Deletion	Ovarian	Patient	Rucaparib	3034	ctDNA
SubjectID_63-5	SubjectID_63	Lin 2018	BRCA1	c.3037_3038delGA	c.2977_3007delAAATGTAAGAAAAATCTGCTAGAGGAAAACT; 3037_3038delGA	Yes	AAAACT	-29	Microhomology deletion	Ovarian	Patient	Platinum	3037	ctDNA
SubjectID_63-6	SubjectID_63	Lin 2018	BRCA1	c.3037_3038delGA	c.3035_3040delGAGAAA	Yes	GAAA	0	Microhomology deletion	Ovarian	Patient	Platinum	3037	ctDNA
SubjectID_63-7	SubjectID_63	Lin 2018	BRCA1	c.3037_3038delGA	c.3007_3016delTTTGAGGAAC; 3037_3038delGA	Yes	AAC	-20	Microhomology deletion	Ovarian	Patient	Rucaparib	3037	ctDNA
SubjectID_63-8	SubjectID_63	Lin 2018	BRCA1	c.3037_3038delGA	Sequence not shown SubjectID_63-8	No		NA	ND	Ovarian	Patient	Rucaparib	3037	ctDNA
SubjectID_63-9	SubjectID_63	Lin 2018	BRCA1	c.3037_3038delGA	Sequence not shown SubjectID_63-9	No		NA	ND	Ovarian	Patient	Rucaparib	3037	ctDNA
SubjectID_63-10	SubjectID_63	Lin 2018	BRCA1	c.3037_3038delGA	Sequence not shown SubjectID_63-10	No		NA	ND	Ovarian	Patient	Rucaparib	3037	ctDNA
SubjectID_63-11	SubjectID_63	Lin 2018	BRCA1	c.3037_3038delGA	Sequence not shown SubjectID_63-11	No		NA	ND	Ovarian	Patient	Rucaparib	3037	ctDNA
SubjectID_70	SubjectID_70	Lin 2018	BRCA1	c.2521delC	c.2398_2763del366	No		0	Deletion	Ovarian	Patient	Platinum	2521	Tumour DNA
SubjectID_75_1	SubjectID_75	Lin 2018	BRCA1	c.2679delG	c.2679delG; 2738_2748delATGAGTCTAAT	Yes	AT	58	Microhomology deletion	Ovarian	Patient	Platinum	2679	Tumour DNA and ctDNA
SubjectID_75_2	SubjectID_75	Lin 2018	BRCA1	c.2679delG	c.2679delG; 2740_2750delGAGTCTAATAT	Yes	AT	60	Microhomology deletion	Ovarian	Patient	Platinum	2679	ctDNA
SubjectID_75_3	SubjectID_75	Lin 2018	BRCA1	c.2679delG	Sequence not shown SubjectID_75_3	No		NA	ND	Ovarian	Patient	Platinum	2679	ctDNA
SubjectID_75_4	SubjectID_75	Lin 2018	BRCA1	c.2679delG	Sequence not shown SubjectID_75_4	No		NA	ND	Ovarian	Patient	Platinum	2679	ctDNA
SubjectID_75_5	SubjectID_75	Lin 2018	BRCA1	c.2679delG	Sequence not shown SubjectID_75_5	No		NA	ND	Ovarian	Patient	Platinum	2679	ctDNA
SubjectID_75_6	SubjectID_75	Lin 2018	BRCA1	c.2679delG	Sequence not shown SubjectID_75_6	No		NA	ND	Ovarian	Patient	Platinum	2679	ctDNA
SubjectID_75_7	SubjectID_75	Lin 2018	BRCA1	c.2679delG	Sequence not shown SubjectID_75_7	No		NA	ND	Ovarian	Patient	Platinum	2679	ctDNA
SubjectID_75_8	SubjectID_75	Lin 2018	BRCA1	c.2679delG	Sequence not shown SubjectID_75_8	No		NA	ND	Ovarian	Patient	Platinum	2679	ctDNA
SubjectID_75_9	SubjectID_75	Lin 2018	BRCA1	c.2679delG	Sequence not shown SubjectID_75_9	No		NA	ND	Ovarian	Patient	Platinum	2679	ctDNA
SubjectID_75_10	SubjectID_75	Lin 2018	BRCA1	c.2679delG	Sequence not shown SubjectID_75_10	No		NA	ND	Ovarian	Patient	Rucaparib	2679	ctDNA
SubjectID_75_11	SubjectID_75	Lin 2018	BRCA1	c.2679delG	Sequence not shown SubjectID_75_11	No		NA	ND	Ovarian	Patient	Rucaparib	2679	ctDNA
SubjectID_75_12	SubjectID_75	Lin 2018	BRCA1	c.2679delG	Sequence not shown SubjectID_75_12	No		NA	ND	Ovarian	Patient	Rucaparib	2679	ctDNA
SubjectID_75_13	SubjectID_75	Lin 2018	BRCA1	c.2679delG	Sequence not shown SubjectID_75_13	No		NA	ND	Ovarian	Patient	Rucaparib	2679	ctDNA
SubjectID_75_14	SubjectID_75	Lin 2018	BRCA1	c.2679delG	Sequence not shown SubjectID_75_14	No		NA	ND	Ovarian	Patient	Rucaparib	2679	ctDNA
SubjectID_75_15	SubjectID_75	Lin 2018	BRCA1	c.2679delG	Sequence not shown SubjectID_75_15	No		NA	ND	Ovarian	Patient	Rucaparib	2679	ctDNA
SubjectID_75_16	SubjectID_75	Lin 2018	BRCA1	c.2679delG	Sequence not shown SubjectID_75_16	No		NA	ND	Ovarian	Patient	Rucaparib	2679	ctDNA
SubjectID_75_17	SubjectID_75	Lin 2018	BRCA1	c.2679delG	Sequence not shown SubjectID_75_17	No		0	ND	Ovarian	Patient	Platinum	2679	ctDNA
SubjectID_75_18	SubjectID_75	Lin 2018	BRCA1	c.2679delG	Sequence not shown SubjectID_75_18	No		NA	ND	Ovarian	Patient	Platinum	2679	ctDNA
SubjectID_75_19	SubjectID_75	Lin 2018	BRCA1	c.2679delG	Sequence not shown SubjectID_75_19	No		NA	ND	Ovarian	Patient	Platinum	2679	ctDNA
SubjectID_75_20	SubjectID_75	Lin 2018	BRCA1	c.2679delG	Sequence not shown SubjectID_75_20	No		NA	ND	Ovarian	Patient	Platinum	2679	ctDNA
SubjectID_78_1	SubjectID_78	Lin 2018	BRCA1	c.3768_3769delAG	c.3768_3769delAG; 3756_3759delGTCT	Yes	GTCT	-8	Microhomology deletion	Ovarian	Patient	Platinum	3768	ctDNA
SubjectID_78_2	SubjectID_78	Lin 2018	BRCA1	c.3768_3769delAG	c.3768_3769delAG; 3715delT	Yes	T	-52	Microhomology deletion	Ovarian	Patient	Platinum	3768	ctDNA
SubjectID_78_3	SubjectID_78	Lin 2018	BRCA1	c.3768_3769delAG	c.3768_3769delAG; 3778_3808delTTATTATCATTGAAGAATAGCTTAAATGACT	Yes	T	8	Microhomology deletion	Ovarian	Patient	Platinum	3768	ctDNA
SubjectID_78_4	SubjectID_78	Lin 2018	BRCA1	c.3768_3769delAG	c.3768_3769delAG; 3696_3705delTAAAGTAAAC	No		0	Deletion	Ovarian	Patient	Platinum	3768	ctDNA
SubjectID_78_5	SubjectID_78	Lin 2018	BRCA1	c.3768_3769delAG	c.3768_3769delAG; 3787_3811delTTGAAGAATAGCTTAAATGACTGCA	Yes	CA	17	Microhomology deletion	Ovarian	Patient	Platinum	3768	ctDNA
SubjectID_78_6	SubjectID_78	Lin 2018	BRCA1	c.3768_3769delAG	Sequence not shown SubjectID_78_6	No		NA	ND	Ovarian	Patient	Platinum	3768	ctDNA
SubjectID_78_7	SubjectID_78	Lin 2018	BRCA1	c.3768_3769delAG	Sequence not shown SubjectID_78_7	No		NA	ND	Ovarian	Patient	Platinum	3768	ctDNA
SubjectID_78_8	SubjectID_78	Lin 2018	BRCA1	c.3768_3769delAG	Sequence not shown SubjectID_78_8	No		NA	ND	Ovarian	Patient	Platinum	3768	ctDNA
SubjectID_95	SubjectID_95	Lin 2018	BRCA1	c.5266dupC	c.5266dupC; 5276_5277dupAG	Yes	AG	9	Microhomology deletion	Ovarian	Patient	Rucaparib	5266	ctDNA
Mayor-Patient-1-1	Patient 1	Mayor 2017	BRCA1	c.5266dupC	c.5266dupC; 5272delA	No		5	Deletion	Ovarian	Patient	Olaparib	5266	ctDNA
Patient 2	Patient 2	Meijer 2019	BRCA1	c.4327C>T	c.4327C>T;4329A>G	No		1	Substitution	Breast	Patient	Carboplatin, paclitaxel, veliparib	4327	Tumour DNA
UWF35	UWF35	Norquist 2011	BRCA1	c.1A>G	wt	No		0	wt	Ovarian	Patient	Chemotherapy	1	Tumour DNA
UWF52	UWF52	Norquist 2011	BRCA1	c.2681_2682delAA	wt	No		0	wt	Ovarian	Patient	Platinum	2681	Tumour DNA
UWF51	UWF51	Norquist 2011	BRCA1	c.181T>A	wt	Yes	AG	0	wt	Ovarian	Patient	Platinum	181	Tumour DNA
AOCS-034_1	AOCS-034	Patch 2015	BRCA1	c.188T>A	c.188T>A; 189A>C	No		0	Substitution	Ovarian	Patient	Platinum	188	Tumour DNA
AOCS-034_2	AOCS-034	Patch 2015	BRCA1	c.188T>A	c.187T>C; 188T>A	No		0	Substitution	Ovarian	Patient	Platinum	188	Tumour DNA
AOCS-088	AOCS-088	Patch 2015	BRCA1	c.5266dupC	c.5266dupC; 5272delA	No		5	Deletion	Ovarian	Patient	Platinum	5266	Tumour DNA
AOCS-095	AOCS-095	Patch 2015	BRCA1	c.4065_4068delTCAA	c.4034insA; 4065_4068delTCAA	No		-30	Insertion	Ovarian	Patient	Platinum	4065	Tumour DNA
AOCS-134	AOCS-134	Patch 2015	BRCA1	c.2162_2163delTT	c.2122delT; 2162_2163delTT	Yes	T	-39	Microhomology deletion	Ovarian	Patient	Platinum	2162	Tumour DNA
Patient_X	Patient_X	Patel 2018	BRCA1	c.5266dupC	c.5266dupC; 5276_5277+1delinsGGT	No		9	Deletion	Ovarian	Patient	Platinum	5266	Tumour DNA
UW91-2	UW91	Swisher 2008	BRCA1	c.68_69delAG	wt	No		0	wt	Ovarian	Patient	Platinum	68	Tumour DNA
UW40_1	UW40	Swisher 2008	BRCA1	c.2475delC	wt	No		0	wt	Ovarian	Patient	Platinum	2475	Tumour DNA
UW40_2	UW40	Swisher 2008	BRCA1	c.2475delC	c.2475delC; 2487_2509del23	Yes	T	11	Microhomology deletion	Ovarian	Patient	Platinum	2475	Tumour DNA
UW80-2	UW80	Swisher 2008	BRCA1	c.68_69delAG	wt	No		0	wt	Ovarian	Patient	Platinum	68	Tumour DNA
UWF27-1	UWF27	Swisher 2008	BRCA1	c.68_69delAG	wt	No		0	wt	Ovarian	Patient	Platinum	68	Tumour DNA
T250cis1	T250	ter Brugge 2017	BRCA1	c.2210delC	c.2008_2709del702	Yes	GAA	0	Microhomology deletion	Breast	PDX	Cisplatin	2210	Tumour DNA
T250cis3	T250	ter Brugge 2017	BRCA1	c.2210delC	c.2184_2197del; 2210delC	Yes	AGGAGAA	-12	Microhomology deletion	Breast	PDX	Cisplatin	2210	Tumour DNA
T250cis5	T250	ter Brugge 2017	BRCA1	c.2210delC	c.2207delAAACAG	Yes	AG	0	Microhomology deletion	Breast	PDX	Cisplatin	2210	Tumour DNA
T250melph2	T250	ter Brugge 2017	BRCA1	c.2210delC	c.2206_2220del15	No		0	Deletion	Breast	PDX	Melphalan	2210	Tumour DNA
T250nim2	T250	ter Brugge 2017	BRCA1	c.2210delC	c.2188_2198del11; 2210delC	Yes	GAAA	-11	Microhomology deletion	Breast	PDX	Nimustine	2210	Tumour DNA
T250nim4	T250	ter Brugge 2017	BRCA1	c.2210delC	c.2165_2172del8; 2210delC	No		-37	Deletion	Breast	PDX	Nimustine	2210	Tumour DNA
T250olap1	T250	ter Brugge 2017	BRCA1	c.2210delC	c.2191_2214del24	Yes	AAAG	0	Microhomology deletion	Breast	PDX	Olaparib	2210	Tumour DNA
T250olap4	T250	ter Brugge 2017	BRCA1	c.2210delC	c.2205_2222del18	No		0	Deletion	Breast	PDX	Olaparib	2210	Tumour DNA
T127cis1	T127	ter Brugge 2017	BRCA1	BRCA1 methylation	Fusion	No		NA	Other	Breast	PDX	Cisplatin	NA	Tumour DNA
T127nim1	T127	ter Brugge 2017	BRCA1	BRCA1 methylation	Fusion	No		NA	Other	Breast	PDX	Nimustine	NA	Tumour DNA
T127nim2	T127	ter Brugge 2017	BRCA1	BRCA1 methylation	Fusion	No		NA	Other	Breast	PDX	Nimustine	NA	Tumour DNA
T127olap1	T127	ter Brugge 2017	BRCA1	BRCA1 methylation	Fusion	No		NA	Other	Breast	PDX	Olaparib	NA	Tumour DNA
Vidula_G_1	Patient G	Vidula 2020	BRCA1	c.1961delA	c.1961delA; 1990_2033del44	Yes	C	0	Microhomology deletion	Breast	Patient	PARPi	1961	ctDNA
Vidula_G_2	Patient G	Vidula 2020	BRCA1	c.1961delA	c.1961delA; 1996_2051del56	Yes	C	34	Microhomology deletion	Breast	Patient	PARPi	1961	ctDNA
Vidula_G_3	Patient G	Vidula 2020	BRCA1	c.1961delA	c.1961delA; 2067_2113del47	Yes	G	105	Microhomology deletion	Breast	Patient	PARPi	1961	ctDNA
Vidula_G_4	Patient G	Vidula 2020	BRCA1	c.1961delA	c.1961delA; 2040_2053del14	Yes	AA	78	Microhomology deletion	Breast	Patient	PARPi	1961	ctDNA
Patient 349_1	Patient 349	Waks 2019	BRCA1	c.1360_1361delAG	c.1141_1432del292ins1; 1360_1361delAG	No		0	Deletion	Breast	Patient	Olaparib	1360	Tumour DNA
Patient 349_2	Patient 349	Waks 2019	BRCA1	c.1360_1361delAG	c.1360_1361delAG; 4083G>C	No		2721	Substitution	Breast	Patient	Olaparib	1360	Tumour DNA
Clone 3	SUM149	Wang 2016	BRCA1	c.2169delT	c.2128_2169del42	No		0	Deletion	Breast	Cell line	NA	2169	Cell line DNA
Clone 4	SUM149	Wang 2016	BRCA1	c.2169delT	c.2150_2157del8; 2169delT	No		-11	Deletion	Breast	Cell line	NA	2169	Cell line DNA
#OCT1	#OCT1	Weigelt 2017	BRCA1	c.4724delC	c.4724delC; 4786_4787delTC	No		61	Deletion	Ovarian	Patient	Platinum	4724	ctDNA
#OCT5	#OCT5	Weigelt 2017	BRCA1	c.68_69delAG	c.68_69delAG; 108delC	Yes	C	38	Microhomology deletion	Ovarian	Patient	Platinum	68	ctDNA
#OCT10_1	#OCT10	Weigelt 2017	BRCA1	c.3908dupT	c.3908dupT; 3926delA	Yes	A	17	Microhomology deletion	Ovarian	Patient	Platinum	3908	ctDNA
#OCT10_2	#OCT10	Weigelt 2017	BRCA1	c.3908dupT	c.3908dupT; 3951delG	No		42	Deletion	Ovarian	Patient	Platinum	3908	ctDNA
#OCT15_1	#OCT15	Weigelt 2017	BRCA1	c.68_69delAG	c.68_69delAG; 85delG	Yes	G	15	Microhomology deletion	Ovarian	Patient	Platinum	68	ctDNA
#OCT15_2	#OCT15	Weigelt 2017	BRCA1	c.68_69delAG	c.68_69delAG; 113delA	Yes	A	43	Microhomology deletion	Ovarian	Patient	Platinum	68	ctDNA
Yap_13	Yap_13	Yap 2020	BRCA1	c.4327C>T	c.4320_4352del33	Yes	GA	0	Microhomology deletion	Ovarian	Patient	Olaparib	4327	ctDNA
Yap_3	Yap_3	Yap 2020	BRCA1	c.427G>T	c.423_432delACCCGAAAA	Yes	A	0	Microhomology deletion	Breast	Patient	Olaparib	427	ctDNA
Yap_res	Yap_res	Yap 2020	BRCA1	c.329insA	c.329insA; 335_338delATAA	Yes	AA	5	Microhomology deletion	Ovarian	Patient	Olaparib	329	ctDNA
Yap_7_1	Yap_7	Yap 2020	BRCA1	c.4041_4042delAG	c.4041_4042delAG; 4062delT	No		19	Deletion	Breast	Patient	Olaparib	4041	ctDNA
Yap_7_2	Yap_7	Yap 2020	BRCA1	c.4041_4042delAG	c.4041_4042delAG; 4050delC	No		7	Deletion	Breast	Patient	Olaparib	4041	ctDNA
Banda-Patient1-1	Patient 1	Banda 2018	BRCA2	c.9097dupA	wt	No		0	wt	Breast	Patient	Veliparib	9097	Tumour DNA
Barber_1	Barber_1	Barber 2013	BRCA2	c.8878C>T	c.8878C>G	Yes	AAGG	0	Microhomology deletion	Breast	Patient	Olaparib	8878	Tumour DNA
Barber_2	Barber_2	Barber 2013	BRCA2	c.4473_4476delGAAA	c.4466_4477delAAATACTGAAAG	Yes	AAA	0	Microhomology deletion	Ovarian	Patient	Olaparib	4473	Tumour DNA
Patient 1_1	Patient 1	Carneiro 2018	BRCA2	c.5946delT	c.5946_5990del45	No		0	Deletion	Prostate	Patient	Olaparib	5946	ctDNA
Patient 1_2	Patient 1	Carneiro 2018	BRCA2	c.5946delT	c.5946delT; 5949_5952dupAAAA	No		2	Insertion	Prostate	Patient	Olaparib	5946	ctDNA
Patient 1_3	Patient 1	Carneiro 2018	BRCA2	c.5946delT	c.5946delT; 5964_5998del35	Yes	GT	17	Microhomology deletion	Prostate	Patient	Olaparib	5946	ctDNA
Patient 1_4	Patient 1	Carneiro 2018	BRCA2	c.5946delT	c.5946delT; 5959_5966delCAGGTATC	Yes	TC	12	Microhomology deletion	Prostate	Patient	Olaparib	5946	ctDNA
Patient 1_5	Patient 1	Carneiro 2018	BRCA2	c.5946delT	c.5946delT; 5992_6005delCAAGTGTTTTCTGA	Yes	GA	45	Microhomology deletion	Prostate	Patient	Olaparib	5946	ctDNA
Patient 1_6	Patient 1	Carneiro 2018	BRCA2	c.5946delT	c.5941_5956delGCAAGTGGAAAATCTGinsA	No		0	Deletion	Prostate	Patient	Olaparib	5946	ctDNA
Patient 1_7	Patient 1	Carneiro 2018	BRCA2	c.5946delT	c.5946delT; 5994_5999delAGTGTTinsTATC	No		47	Deletion	Prostate	Patient	Olaparib	5946	ctDNA
Patient 1_8	Patient 1	Carneiro 2018	BRCA2	c.5946delT	c.5946delT; 5998_6008delTTTTCTGAAATinsCAA	No		51	Deletion	Prostate	Patient	Olaparib	5946	ctDNA
Patient 1_9	Patient 1	Carneiro 2018	BRCA2	c.5946delT	c.5944_5952delAGTGGAAAA	Yes	A	0	Microhomology deletion	Prostate	Patient	Olaparib	5946	ctDNA
Patient 1_10	Patient 1	Carneiro 2018	BRCA2	c.5754_5755delTA	c.5736delA; 5754_5755delTA	No		-17	Deletion	Prostate	Patient	Olaparib	5754	ctDNA
Patient 1_11	Patient 1	Carneiro 2018	BRCA2	c.5754_5755delTA	c.5748_5754delTTCACATinsC	No		0	Deletion	Prostate	Patient	Olaparib	5754	ctDNA
Patient1_1	Patient 1	Cheng 2018	BRCA2	c.7355delA	c.7355delA; 7389_7408del20	Yes	TCA	33	Microhomology deletion	Prostate	Patient	Carboplatin	7355	ctDNA
Patient1_2	Patient 1	Cheng 2018	BRCA2	c.7355delA	c.7355delA; 7391_7413del23	Yes	AAG	35	Microhomology deletion	Prostate	Patient	Carboplatin	7355	ctDNA
Patient1_3	Patient 1	Cheng 2018	BRCA2	c.7355delA	c.7355delA; 7397_7413del17; 7414A>C	Yes	CA	41	Microhomology deletion	Prostate	Patient	Carboplatin	7355	ctDNA
Patient1_4	Patient 1	Cheng 2018	BRCA2	c.7355delA	c.7355delA; 7400ins1	No		44	Insertion	Prostate	Patient	Carboplatin	7355	ctDNA
Patient1_5	Patient 1	Cheng 2018	BRCA2	c.7355delA	c.7355delA; 7384_7391delTCCAATCA	No		28	Deletion	Prostate	Patient	Carboplatin	7355	ctDNA
Patient1_6	Patient 1	Cheng 2018	BRCA2	c.7355delA	c.7355delA; 7363_7373delCATCAGTTTAA	Yes	CA	7	Microhomology deletion	Prostate	Patient	Carboplatin	7355	ctDNA
Patient1_7	Patient 1	Cheng 2018	BRCA2	c.7355delA	c.7352_7372del21	Yes	ACAA	0	Microhomology deletion	Prostate	Patient	Carboplatin	7355	ctDNA
Patient1_8	Patient 1	Cheng 2018	BRCA2	c.7355delA	c.7355delA; 7366_7379delCAGTTTAACAAAAA	Yes	CA	10	Microhomology deletion	Prostate	Patient	Carboplatin	7355	ctDNA
Patient1_9	Patient 1	Cheng 2018	BRCA2	c.7355delA	c.7355delA; 7369_7382delTTTAACAAAAACAA	No		13	Deletion	Prostate	Patient	Carboplatin	7355	ctDNA
Patient1_10	Patient 1	Cheng 2018	BRCA2	c.7355delA	c.7355delA; 7402_7406delGTAAC; 7408TT>CA	No		46	Deletion	Prostate	Patient	Carboplatin	7355	ctDNA
Patient1_11	Patient 1	Cheng 2018	BRCA2	c.7355delA	c.7355delA; 7361ins1	No		5	Insertion	Prostate	Patient	Carboplatin	7355	ctDNA
Subject 3	Subject 3	Christie 2017	BRCA2	c.151G>T	c.151G>T; 152A>T	No		0	Substitution	Ovarian	Patient	Taxane and Platin-based chemotherapy	151	Tumour DNA
Subject 5-1	Subject 5	Christie 2017	BRCA2	c.771_775delTCAAA	c.755_758delACAG; 771_775delTCAAA	Yes	ACAG	-12	Microhomology deletion	Ovarian	Patient	Taxane and Platin-based chemotherapy	771	ctDNA
Subject 5-2	Subject 5	Christie 2017	BRCA2	c.771_775delTCAAA	c.817_829del13; 771_775delTCAAA	No		41	Deletion	Ovarian	Patient	Taxane and Platin-based chemotherapy	771	ctDNA
Subject 5-3	Subject 5	Christie 2017	BRCA2	c.771_775delTCAAA	c.771_775delTCAAA; 725_755del31	No		-15	Deletion	Ovarian	Patient	Taxane and Platin-based chemotherapy	771	ctDNA
Subject 5-4	Subject 5	Christie 2017	BRCA2	c.771_775delTCAAA	c.796_814del19; 771_775delTCAAA	Yes	GGA	20	Microhomology deletion	Ovarian	Patient	Taxane and Platin-based chemotherapy	771	ctDNA
Subject 5-5	Subject 5	Christie 2017	BRCA2	c.771_775delTCAAA	c.782delCTGCAAG; 771_775delTCAAA	Yes	AAG	6	Microhomology deletion	Ovarian	Patient	Taxane and Platin-based chemotherapy	771	ctDNA
201	201	Cruz 2018	BRCA2	c.145G>T	c.145_168del24	Yes	TA	0	Microhomology deletion	Breast	Patient	Olaparib	145	Tumour DNA
CAPAN1.B2.S*	Capan1	Drean 2017	BRCA2	c.5946delT	c.5946delT; 5955_5959delTGTCC	No		8	Deletion	Pancreatic	Cell line	Olaparib and Talazoparib	5946	Cell line DNA
CAPAN1.B2.S*2_1	Capan1	Drean 2017	BRCA2	c.5946delT	c.5946delT; 5958_5962delCCAGG	No		11	Deletion	Pancreatic	Cell line	Olaparib and Talazoparib	5946	Cell line DNA
CAPAN1.B2.S*2_2	Capan1	Drean 2017	BRCA2	c.5946delT	c.5946delT; 5956delG	No		9	Deletion	Pancreatic	Cell line	Olaparib and Talazoparib	5946	Cell line DNA
CAPAN1.B2.S*2_3	Capan1	Drean 2017	BRCA2	c.5946delT	c.5946delT; 5957_5958delTC	No		10	Deletion	Pancreatic	Cell line	Olaparib and Talazoparib	5946	Cell line DNA
CAPAN1.B2.S*3_1	Capan1	Drean 2017	BRCA2	c.5946delT	c.5946delT; 5956_5961delGTCCAG	Yes	GT	9	Microhomology deletion	Pancreatic	Cell line	Olaparib and Talazoparib	5946	Cell line DNA
CAPAN1.B2.S*3_2	Capan1	Drean 2017	BRCA2	c.5946delT	c.5946delT; 5956_5960delGTCCA	Yes	G	9	Microhomology deletion	Pancreatic	Cell line	Olaparib and Talazoparib	5946	Cell line DNA
CAPAN1.B2.S*3_3	Capan1	Drean 2017	BRCA2	c.5946delT	c.5946delT; 5958_5960delCCA	No		11	Deletion	Pancreatic	Cell line	Olaparib and Talazoparib	5946	Cell line DNA
PIR1,3-6	Capan1	Edwards 2008	BRCA2	c.5946delT	c.5348_9682del	Yes	ATCAAA	0	Microhomology deletion	Pancreatic	Cell line	Olaparib	5946	Cell line DNA and cDNA
PIR2	Capan1	Edwards 2008	BRCA2	c.5946delT	c.5272_9674del	Yes	TATAT	0	Microhomology deletion	Pancreatic	Cell line	Olaparib	5946	Cell line DNA and cDNA
PIR7-11	Capan1	Edwards 2008	BRCA2	c.5946delT	c.5209_8880del	Yes	AACAA	0	Microhomology deletion	Pancreatic	Cell line	Olaparib	5946	Cell line DNA and cDNA
PIR12	Capan1	Edwards 2008	BRCA2	c.5946delT	c.5755_6213del	Yes	T	0	Microhomology deletion	Pancreatic	Cell line	Olaparib	5946	Cell line DNA and cDNA
UK1999	UK1999	Edwards 2008	BRCA2	c.5946delT	c.5946delT; 5954_6090del137	Yes	GAAAAT	7	Microhomology deletion	Ovarian	Patient	Platinum	5946	Tumour DNA
UK2223	UK2223	Edwards 2008	BRCA2	c.5946delT	c.5946delT; 5952_5959delATCTGTCC	Yes	A	5	Microhomology deletion	Ovarian	Patient	Platinum, taxol	5946	Tumour DNA
Patient A	Patient A	Goodall 2017	BRCA2	c.4544insA	c.4544insA; 4566_4593del28	Yes	G	21	Microhomology deletion	Prostate	Patient	Olaparib	4544	ctDNA
Patient B_1	Patient B	Goodall 2017	BRCA2	c.3170_3174delAGAAA	c.3170_3174delAGAAA; 3195_3198delTAAT	Yes	AAT	20	Microhomology deletion	Prostate	Patient	Olaparib	3170	ctDNA
Patient B_2	Patient B	Goodall 2017	BRCA2	c.3170_3174delAGAAA	c.3170_3174delAGAAA; 3147_3182del36	Yes	AA	0	Microhomology deletion	Prostate	Patient	Olaparib	3170	ctDNA
Patient B_3	Patient B	Goodall 2017	BRCA2	c.3170_3174delAGAAA	c.3397delAGAAA; 3188_3206del19	Yes	TC	13	Microhomology deletion	Prostate	Patient	Olaparib	3170	ctDNA
Patient B_4	Patient B	Goodall 2017	BRCA2	c.3170_3174delAGAAA	c.3078_3176del99	Yes	GAGCAA	0	Microhomology deletion	Prostate	Patient	Olaparib	3170	ctDNA
Patient C_1	Patient C	Goodall 2017	BRCA2	c.6462_6463delTC	c.6458_6469del12	Yes	TCTC	0	Microhomology deletion	Prostate	Patient	Olaparib	6462	ctDNA
Patient C_2	Patient C	Goodall 2017	BRCA2	c.6462_6463delTC	c.6664_6690del27	No		0	Deletion	Prostate	Patient	Olaparib	6462	ctDNA
Gornstein-Patient-1-1	Patient 1	Gornstein 2017	BRCA2	c.3847_3848delGT	c.3838_3864del27	Yes	GAAAA	0	Microhomology deletion	Breast	Patient	Olaparib	3847	Tumour DNA and ctDNA
FA-AML1	FA-AML1	Ikeda 2003	BRCA2	c.8504C>A	c.8503T>G; 8504C>A	No		0	Substitution	NA	Cell line	No specific drug treatment, likely spontaneous.	8504	Cell line DNA
F21_0019	F21_0019	Khalique 2019	BRCA2	c.5444_5447delCTAG	c.5444_5447delCTAG; 5489_5520del32	Yes	CCA	41	Microhomology deletion	Ovarian	Patient	Olaparib	5444	Tumour DNA
SubjectID_22	SubjectID_22	Lin 2018	BRCA2	c.7480C>T	c.7480C>A	No		0	Substitution	Ovarian	Patient	Rucaparib	7480	ctDNA
SubjectID_36-2	SubjectID_36	Lin 2018	BRCA2	c.3975_3978dupTGCT	c.3884_3905delAAAATAATATTGAAATGACTAC; 3975_3978dupTGCT	Yes	TAC	0	Microhomology deletion	Ovarian	Patient	Rucaparib	3975	ctDNA
SubjectID_44	SubjectID_44	Lin 2018	BRCA2	c.1561delT	c.1546_1575delTTCAATGCAAGTTTTTCAGGTCATATGACT	Yes	GACT	0	Microhomology deletion	Ovarian	Patient	Rucaparib	1561	ctDNA
SubjectID_53	SubjectID_53	Lin 2018	BRCA2	c.5164_5165delAG	c.5153_5165delATAATTCAAACAGinsC	No		0	Deletion	Ovarian	Patient	Platinum	5164	ctDNA
SubjectID_54-1	SubjectID_54	Lin 2018	BRCA2	c.7558C>T	c.7558C>T; 7560A>C	No		1	Substitution	Ovarian	Patient	Platinum	7558	ctDNA
SubjectID_54-2	SubjectID_54	Lin 2018	BRCA2	c.7558C>T	c.7558C>T; 7559G>T; 7560A>C	No		0	Substitution	Ovarian	Patient	Rucaparib	7558	ctDNA
SubjectID_71	SubjectID_71	Lin 2018	BRCA2	c.262_263delCT	c.262_263delCT; 289_289delG	No		25	Deletion	Ovarian	Patient	Platinum	262	Tumour DNA and ctDNA
SubjectID_85	SubjectID_85	Lin 2018	BRCA2	c.8533_8536delAGAG	c.8529_8537delTGAAAGAGA	Yes	A	0	Microhomology deletion	Ovarian	Patient	Rucaparib	8533	ctDNA
Kura-R-C3, Kura-R-C9	Kura-R	Liu et al 2019	BRCA2	c.6952C>T	wt	No		0	wt	Ovarian	Cell line	Olaparib	6952	Cell line DNA
CS1	CS1	Norquist 2011	BRCA2	c.4965delC	c.4965delC; 4949insA	No		-15	Insertion	Ovarian	Patient	Platinum	4965	Tumour DNA
UW400	UW400	Norquist 2011	BRCA2	c.3847_3848delGT	wt	No		0	wt	Ovarian	Patient	Platinum	3847	Tumour DNA
UW304	UW304	Norquist 2011	BRCA2	c.5946delT	wt	No		0	wt	Ovarian	Patient	Platinum	5946	Tumour DNA
UW200_1	UW200	Norquist 2011	BRCA2	c.4461_4462delAC	wt	Yes	AC	0	wt	Ovarian	Patient	Platinum	4461	Tumour DNA
UW200_2	UW200	Norquist 2011	BRCA2	c.4461_4462delAC	wt	Yes	AC	0	wt	Ovarian	Patient	Platinum	4461	Tumour DNA
PEO_ascites	PEO	Norquist 2011	BRCA2	c.4965C>G	c.4965C>T	No		0	Substitution	Ovarian	Patient	Platinum	4965	Tumour DNA
AOCS-167_1	AOCS-167	Patch 2015	BRCA2	c.767_771delCAAAT	c.750_753delGACA; 767_771delCAAAT	Yes	GACA	-13	Microhomology deletion	Ovarian	Patient	Platinum	767	Tumour DNA
AOCS-167_2	AOCS-167	Patch 2015	BRCA2	c.767_771delCAAAT	c.767_771delCAAAT; 779_785delAAGCTGC	Yes	AAG	7	Microhomology deletion	Ovarian	Patient	Platinum	767	Tumour DNA
AOCS-167_3	AOCS-167	Patch 2015	BRCA2	c.767_771delCAAAT	c.767_771delCAAAT; 794-1_811delGGATTTGGAAAAACATCAG	Yes	GGA	22	Microhomology deletion	Ovarian	Patient	Platinum	767	Tumour DNA
AOCS-167_4	AOCS-167	Patch 2015	BRCA2	c.767_771delCAAAT	c.767_771delCAAAT; 817_830delTCATTTAAAGTAAAinsG	Yes	T	45	Microhomology deletion	Ovarian	Patient	Platinum	767	Tumour DNA
AOCS-167_5	AOCS-167	Patch 2015	BRCA2	c.767_771delCAAAT	c.725_755delAAAATGATAGATTTATCGCTTCTGTGACAGA; 767_771delCAAAT	Yes	AGA	-11	Microhomology deletion	Ovarian	Patient	Platinum	767	Tumour DNA
AOCS-167_6	AOCS-167	Patch 2015	BRCA2	c.767_771delCAAAT	c.745_783del39	Yes	GCT	0	Microhomology deletion	Ovarian	Patient	Platinum	767	Tumour DNA
AOCS-167_7	AOCS-167	Patch 2015	BRCA2	c.767_771delCAAAT	c.767_782delCAAATCAAAGAGAAG	Yes	C	0	Microhomology deletion	Ovarian	Patient	Platinum	767	Tumour DNA
AOCS-167_8	AOCS-167	Patch 2015	BRCA2	c.767_771delCAAAT	c.767_775delCAAATCAAA	Yes	AA	0	Microhomology deletion	Ovarian	Patient	Platinum	767	Tumour DNA
AOCS-167_9	AOCS-167	Patch 2015	BRCA2	c.767_771delCAAAT	c.767_771delCAAAT; 780delA	Yes	A	8	Microhomology deletion	Ovarian	Patient	Platinum	767	Tumour DNA
AOCS-167_10	AOCS-167	Patch 2015	BRCA2	c.767_771delCAAAT	c.767_771delCAAAT; 794_833del40	Yes	G	22	Microhomology deletion	Ovarian	Patient	Platinum	767	Tumour DNA
AOCS-167_11	AOCS-167	Patch 2015	BRCA2	c.767_771delCAAAT	c.767_771delCAAAT; 803_815delAAACATCAGGGAA	Yes	GGAA	31	Microhomology deletion	Ovarian	Patient	Platinum	767	Tumour DNA
AOCS-167_13	AOCS-167	Patch 2015	BRCA2	c.767_771delCAAAT	c.767_771delCAAAT; 806_830del25	Yes	AAA	34	Microhomology deletion	Ovarian	Patient	Platinum	767	Tumour DNA
AOCS-167_14	AOCS-167	Patch 2015	BRCA2	c.767_771delCAAAT	c.767_771delCAAAT; 812_833delGGAATTCATTTAAAGTAAATAG	Yes	AG	40	Microhomology deletion	Ovarian	Patient	Platinum	767	Tumour DNA
AOCS-167_15	AOCS-167	Patch 2015	BRCA2	c.767_771delCAAAT	c.767_771delCAAAT; 816_825delTTCATTTAAA	Yes	AA	44	Microhomology deletion	Ovarian	Patient	Platinum	767	Tumour DNA
AOCS-167_16	AOCS-167	Patch 2015	BRCA2	c.767_771delCAAAT	Other	No		NA	Other	Ovarian	Patient	Platinum	767	Tumour DNA
Pishvaian-Patient 1-1	Patient 1	Pishvaian 2017	BRCA2	c.6486_6489delACAA	c.6448_6473delAAAGTTTCTCCATATCTCTCTCAATT; 6486_6489delACAA	Yes	ATT	-12	Microhomology deletion	Pancreatic	Patient	Veliparib	6486	Tumour DNA
Patient 1_D1	Patient 1	Quigley 2017	BRCA2	c.5614A>T	c.5501_5677del177	Yes	GT	0	Microhomology deletion	Prostate	Patient	Talazoparib	5614	Tumour DNA and ctDNA
Patient 1_D2	Patient 1	Quigley 2017	BRCA2	c.5614A>T	c.5612_5677del66	Yes	GT	0	Microhomology deletion	Prostate	Patient	Talazoparib	5614	Tumour DNA and ctDNA
Patient 1_D3	Patient 1	Quigley 2017	BRCA2	c.5614A>T	c.5603_5629del27	Yes	ACA	0	Microhomology deletion	Prostate	Patient	Talazoparib	5614	ctDNA
Patient 1_D4	Patient 1	Quigley 2017	BRCA2	c.5614A>T	c.5516_5704del189	Yes	GAGG	0	Microhomology deletion	Prostate	Patient	Talazoparib	5614	ctDNA
Patient 1_D5	Patient 1	Quigley 2017	BRCA2	c.5614A>T	c.5443_5682del240	No		0	Deletion	Prostate	Patient	Talazoparib	5614	ctDNA
Patient 1_D6	Patient 1	Quigley 2017	BRCA2	c.5614A>T	c.5539_5670del132	Yes	GC	0	Microhomology deletion	Prostate	Patient	Talazoparib	5614	ctDNA
Patient 1_D7	Patient 1	Quigley 2017	BRCA2	c.5614A>T	c.5370_5987del618	Yes	AA	0	Microhomology deletion	Prostate	Patient	Talazoparib	5614	ctDNA
Patient 2_1	Patient 2	Quigley 2017	BRCA2	c.775_776delAG	c.750_753delGACA; 775_776delAG	Yes	GACA	-21	Microhomology deletion	Prostate	Patient	Olaparib	775	ctDNA
Patient 2_2	Patient 2	Quigley 2017	BRCA2	c.775_776delAG	c.775_776delAG; 779_785delAAGCTGC	Yes	AAG	2	Microhomology deletion	Prostate	Patient	Olaparib	775	ctDNA
Patient 2_3	Patient 2	Quigley 2017	BRCA2	c.775_776delAG	c.719_758del40; 775_776delAG	Yes	TGAA	-16	Microhomology deletion	Prostate	Patient	Olaparib	775	ctDNA
Patient 2_4	Patient 2	Quigley 2017	BRCA2	c.775_776delAG	c.748_757delGTGACAGACA; 775_776delAG	Yes	GTGA	-17	Microhomology deletion	Prostate	Patient	Olaparib	775	ctDNA
Patient 2_5	Patient 2	Quigley 2017	BRCA2	c.775_776delAG	c.771delT; 775_776delAG	No		-3	Deletion	Prostate	Patient	Olaparib	775	ctDNA
Patient 2_6	Patient 2	Quigley 2017	BRCA2	c.775_776delAG	c.771_788del18	Yes	TCA	0	Microhomology deletion	Prostate	Patient	Olaparib	775	ctDNA
Patient 2_7	Patient 2	Quigley 2017	BRCA2	c.775_776delAG	c.775_776delAG; 790delC	No		13	Deletion	Prostate	Patient	Olaparib	775	ctDNA
Patient 2_8	Patient 2	Quigley 2017	BRCA2	c.775_776delAG	c.775_776delAG; 780_792del13	No		3	Deletion	Prostate	Patient	Olaparib	775	ctDNA
Patient 2_9	Patient 2	Quigley 2017	BRCA2	c.775_776delAG	c.775_776delAG; 781delG	No		4	Deletion	Prostate	Patient	Olaparib	775	ctDNA
Patient 2_10	Patient 2	Quigley 2017	BRCA2	c.775_776delAG	c.753_776del24	Yes	AGA	0	Microhomology deletion	Prostate	Patient	Olaparib	775	ctDNA
Patient 2_11	Patient 2	Quigley 2017	BRCA2	c.775_776delAG	c.768_788del21	No		0	Deletion	Prostate	Patient	Olaparib	775	ctDNA
Patient 2_12	Patient 2	Quigley 2017	BRCA2	c.775_776delAG	c.766_772delACAAATC; 775_776delAG	Yes	A	-2	Microhomology deletion	Prostate	Patient	Olaparib	775	ctDNA
Patient 2_13	Patient 2	Quigley 2017	BRCA2	c.775_776delAG	c.761delA; 775_776delAG	Yes	A	-13	Microhomology deletion	Prostate	Patient	Olaparib	775	ctDNA
Patient 2_14	Patient 2	Quigley 2017	BRCA2	c.775_776delAG	c.768delA; 775_776delAG	Yes	A	-6	Microhomology deletion	Prostate	Patient	Olaparib	775	ctDNA
Patient 2_15	Patient 2	Quigley 2017	BRCA2	c.775_776delAG	c.750delG; 753delAGA; 775_776delAG	No		-24	Deletion	Prostate	Patient	Olaparib	775	ctDNA
Patient 2_16	Patient 2	Quigley 2017	BRCA2	c.775_776delAG	c.742_780del39	Yes	GCT	0	Microhomology deletion	Prostate	Patient	Olaparib	775	ctDNA
Patient 2_17	Patient 2	Quigley 2017	BRCA2	c.775_776delAG	c.735_748del14; 757insCAGA; 775_776delAG	Yes	G	-26	Microhomology deletion	Prostate	Patient	Olaparib	775	ctDNA
Patient 2_18	Patient 2	Quigley 2017	BRCA2	c.775_776delAG	c.729_782del54	Yes	TG	0	Microhomology deletion	Prostate	Patient	Olaparib	775	ctDNA
Patient 2_19	Patient 2	Quigley 2017	BRCA2	c.775_776delAG	c.723_759del37; 775_776delAG	Yes	GAAAA	-15	Microhomology deletion	Prostate	Patient	Olaparib	775	ctDNA
Patient 2_20	Patient 2	Quigley 2017	BRCA2	c.775_776delAG	c.720_753del34; 775_776delAG	Yes	GA	-21	Microhomology deletion	Prostate	Patient	Olaparib	775	ctDNA
Patient 2_21	Patient 2	Quigley 2017	BRCA2	c.775_776delAG	c.775_776delAG; 799insCA; 800G>A	No		22	Substitution	Prostate	Patient	Olaparib	775	ctDNA
Patient 2_22	Patient 2	Quigley 2017	BRCA2	c.775_776delAG	c.775_776delAG; 811delG	No		34	Deletion	Prostate	Patient	Olaparib	775	ctDNA
Patient 2_23	Patient 2	Quigley 2017	BRCA2	c.775_776delAG	c.775_776delAG; 801delA	No		24	Deletion	Prostate	Patient	Olaparib	775	ctDNA
Patient 2_24	Patient 2	Quigley 2017	BRCA2	c.775_776delAG	c.775_776delAG; 807delA	No		30	Deletion	Prostate	Patient	Olaparib	775	ctDNA
Patient 2_25	Patient 2	Quigley 2017	BRCA2	c.775_776delAG	Other	No		NA	Other	Prostate	Patient	Olaparib	775	ctDNA
Patient 2_26	Patient 2	Quigley 2017	BRCA2	c.775_776delAG	c.775_776delAG; 795_806del12; 813_828del16	Yes	AT;AAT	18	Microhomology deletion	Prostate	Patient	Olaparib	775	ctDNA
Patient 2_27	Patient 2	Quigley 2017	BRCA2	c.775_776delAG	c.775_776delAG; 806_836del31	Yes	CA	29	Microhomology deletion	Prostate	Patient	Olaparib	775	ctDNA
Patient 2_28	Patient 2	Quigley 2017	BRCA2	c.775_776delAG	c.775_776delAG; 806delC	No		29	Deletion	Prostate	Patient	Olaparib	775	ctDNA
Patient 2_29	Patient 2	Quigley 2017	BRCA2	c.775_776delAG	c.775_776delAG; 799_811del13	Yes	GGAA	22	Microhomology deletion	Prostate	Patient	Olaparib	775	ctDNA
Patient 2_30	Patient 2	Quigley 2017	BRCA2	c.775_776delAG	c.775_776delAG; 814_823delAATTCATTTA	Yes	AA	37	Microhomology deletion	Prostate	Patient	Olaparib	775	ctDNA
Patient 2_31	Patient 2	Quigley 2017	BRCA2	c.775_776delAG	c.775_776delAG; 797_839del43	No		20	Deletion	Prostate	Patient	Olaparib	775	ctDNA
Patient 2_32	Patient 2	Quigley 2017	BRCA2	c.775_776delAG	c.775_776delAG; 812delGGAATTCATT	No		35	Deletion	Prostate	Patient	Olaparib	775	ctDNA
Patient 2_33	Patient 2	Quigley 2017	BRCA2	c.775_776delAG	c.775_776delAG; 813_837del25	No		36	Deletion	Prostate	Patient	Olaparib	775	ctDNA
Patient 2_34	Patient 2	Quigley 2017	BRCA2	c.775_776delAG	c.775_776delAG; 811delGGG; 815insAC	No		34	Deletion	Prostate	Patient	Olaparib	775	ctDNA
HCC1428-1	HCC1428	Sakai 2008	BRCA2	c.5946delT	c.4203_6842del2640	Yes	GG	0	Microhomology deletion	Breast	Cell line	Chemotherapy	5946	Cell line DNA and cDNA
HCC1428-2	HCC1428	Sakai 2008	BRCA2	c.5946delT	c.4656_6842del2187	Yes	GG	0	Microhomology deletion	Breast	Cell line	Chemotherapy	5946	Cell line DNA and cDNA
C2-1, C2-2	C2	Sakai 2008	BRCA2	c.5946delT	c.5946delT; 6004_6010del7insTCATTACAAAACGC	No		57	Deletion	Pancreatic	Cell line	Cisplatin	5946	Cell line DNA and cDNA
C2-4, C2-14	C2	Sakai 2008	BRCA2	c.5946delT	c.5946delT; 5963insT	Yes	T	16	Microhomology deletion	Pancreatic	Cell line	Cisplatin	5946	Cell line DNA and cDNA
C2-5	C2	Sakai 2008	BRCA2	c.5946delT	c.5779_6575del797	Yes	TG	0	Microhomology deletion	Pancreatic	Cell line	Cisplatin	5946	Cell line DNA and cDNA
C2-6	C2	Sakai 2008	BRCA2	c.5946delT	c.5642_6137del496insTAAT	No		0	Deletion	Pancreatic	Cell line	Cisplatin	5946	Cell line DNA and cDNA
C2-12	C2	Sakai 2008	BRCA2	c.5946delT	c.5958_5998del41	Yes	TGT	11	Microhomology deletion	Pancreatic	Cell line	Cisplatin	5946	Cell line DNA and cDNA
CS2	CS2	Sakai 2008	BRCA2	c.8537_8538delAG	wt	Yes	AG	0	wt	Ovarian	Patient	Platinum	8537	Tumour DNA
UW3548	UW3548	Sakai 2008	BRCA2	c.5946delT	wt	No		0	wt	Ovarian	Patient	Platinum	5946	Tumour DNA
PEO4	PEO	Sakai 2009	BRCA2	c.4965C>G	c.4965C>T	No		0	Substitution	Ovarian	Cell line	Cisplatin and PARPi (AG14361)	4965	Cell line DNA and cDNA
PEO6	PEO	Sakai 2009	BRCA2	c.4965C>G	c.4965C>T	No		0	Substitution	Ovarian	Cell line	Cisplatin and PARPi (AG14361)	4965	Cell line DNA and cDNA
C4-1, C4-2, C4-5, C4-6, C4-7, C4-10, C4-12, C4-14	C4	Sakai 2009	BRCA2	c.4965C>G	c.4964A>T; 4965C>T	No		0	Substitution	Ovarian	Cell line	Cisplatin and PARPi (AG14361)	4965	Cell line DNA and cDNA
AG4-8, AG4-11, AG4-12	AG4	Sakai 2009	BRCA2	c.4965C>G	c.4964A>T; 4965C>T	No		0	Substitution	Ovarian	Cell line	Cisplatin and PARPi (AG14361)	4965	Cell line DNA and cDNA
Patient 5	Patient 5	Shroff 2018	BRCA2	c.1499delG	c.1416_1420delGCATC; 1499delG	No		-78	Deletion	Pancreatic	Patient	Rucaparib	1499	ctDNA
Patient 14	Patient 14	Shroff 2018	BRCA2	c.1387delA	c.1355_1380delTACCAAAATCAGAGAAGCCATTAAAT; 1387delA	No		-6	Deletion	Pancreatic	Patient	Rucaparib	1387	ctDNA
Simmons_1	Simmons	Simmons 2020	BRCA2	c.5727_5728insG	c.5528_5956del429	Yes	CTG	0	Microhomology deletion	Prostate	Patient	Carboplatin, rucaparib	5727	ctDNA
Simmons_2	Simmons	Simmons 2020	BRCA2	c.5727_5728insG	c.5671_5808del138	Yes	TATG	0	Microhomology deletion	Prostate	Patient	Carboplatin, rucaparib	5727	ctDNA
Simmons_3	Simmons	Simmons 2020	BRCA2	c.5727_5728insG	c.5727_5731del5insAGACT	No		0	Deletion	Prostate	Patient	Carboplatin, rucaparib	5727	ctDNA
Simmons_4	Simmons	Simmons 2020	BRCA2	c.5727_5728insG	c.5726_5735del10insT	No		0	Deletion	Prostate	Patient	Carboplatin, rucaparib	5727	ctDNA
Simmons_5	Simmons	Simmons 2020	BRCA2	c.5727_5728insG	c.4989_6146del1158	Yes	GT	0	Microhomology deletion	Prostate	Patient	Carboplatin, rucaparib	5727	ctDNA
Simmons_6	Simmons	Simmons 2020	BRCA2	c.5727_5728insG	c.5709_5727del19insG	No		0	Deletion	Prostate	Patient	Carboplatin, rucaparib	5727	ctDNA
Simmons_7	Simmons	Simmons 2020	BRCA2	c.5727_5728insG	c.5722_5730delCTAGATAAT	Yes	T	0	Microhomology deletion	Prostate	Patient	Carboplatin, rucaparib	5727	ctDNA
Simmons_8	Simmons	Simmons 2020	BRCA2	c.5727_5728insG	c.5721_5750del30	Yes	TC	0	Microhomology deletion	Prostate	Patient	Carboplatin, rucaparib	5727	ctDNA
Simmons_9	Simmons	Simmons 2020	BRCA2	c.5727_5728insG	c.5292_6025del734insCA	No		0	Deletion	Prostate	Patient	Carboplatin, rucaparib	5727	ctDNA
Simmons_10	Simmons	Simmons 2020	BRCA2	c.5727_5728insG	c.5728_5733delAATGAT	Yes	GAT	0	Microhomology deletion	Prostate	Patient	Carboplatin, rucaparib	5727	ctDNA
Simmons_11	Simmons	Simmons 2020	BRCA2	c.5727_5728insG	c.5362_6340del973insGATACCA	No		0	Deletion	Prostate	Patient	Carboplatin, rucaparib	5727	ctDNA
Simmons_12	Simmons	Simmons 2020	BRCA2	c.5727_5728insG	c.5333_6841+197del1706	No		0	Deletion	Prostate	Patient	Carboplatin, rucaparib	5727	ctDNA
Tao_1	Tao	Tao 2020	BRCA2	c.5410_5411delGT	c.4434_5686del1253insTT	No		0	Deletion	Pancreatic	Patient	Cisplatin, olaparib	5410	ctDNA
Tao_2	Tao	Tao 2020	BRCA2	c.5410_5411delGT	c.4897_6807del1911	Yes	T	0	Microhomology deletion	Pancreatic	Patient	Cisplatin, olaparib	5410	Tumour DNA and ctDNA
Vidula_A_1	Patient A	Vidula 2020	BRCA2	c.5576_5579delTTAA	c.5550_5572del23; 5576_5579delTTAA	Yes	AA	0	Microhomology deletion	Breast	Patient	Unclear	5576	ctDNA
Vidula_B_1	Patient B	Vidula 2020	BRCA2	c.4876_4877delAA	c.4876_4887del	Yes	TC	0	Microhomology deletion	Prostate	Patient	Unclear	4876	ctDNA
Vidula_C_1	Patient C	Vidula 2020	BRCA2	c.2385_2386insAA	c.2385_2386insAA; 2401_2420del20	Yes	GT	14	Microhomology deletion	Breast	Patient	PARPi	2385	ctDNA
Vidula_C_2	Patient C	Vidula 2020	BRCA2	c.2385_2386insAA	c.2385_2386insAA; 2404_2429del29	Yes	TAAC	17	Microhomology deletion	Breast	Patient	PARPi	2385	ctDNA
Vidula_C_3	Patient C	Vidula 2020	BRCA2	c.2385_2386insAA	c.2385_2386insAA; 2412_2452del41	Yes	GAATC	25	Microhomology deletion	Breast	Patient	PARPi	2385	ctDNA
Vidula_C_4	Patient C	Vidula 2020	BRCA2	c.2385_2386insAA	c.2370_2387del18	Yes	CAaaGA	0	Microhomology deletion	Breast	Patient	PARPi	2385	ctDNA
Vidula_C_5	Patient C	Vidula 2020	BRCA2	c.2385_2386insAA	c.2362_2369del8; 2385_2386insAA	Yes	AGA	-15	Microhomology deletion	Breast	Patient	PARPi	2385	ctDNA
Vidula_C_6	Patient C	Vidula 2020	BRCA2	c.2385_2386insAA	c.2385_2386insAA; 2397insA	No		10	Insertion	Breast	Patient	PARPi	2385	ctDNA
Vidula_C_7	Patient C	Vidula 2020	BRCA2	c.2385_2386insAA	c.2354_2364del11; 2385_2386insAA	No		-20	Deletion	Breast	Patient	PARPi	2385	ctDNA
Vidula_C_8	Patient C	Vidula 2020	BRCA2	c.2385_2386insAA	c.2385_2386insAA; 2392insC	No		5	Insertion	Breast	Patient	PARPi	2385	ctDNA
Vidula_C_9	Patient C	Vidula 2020	BRCA2	c.2385_2386insAA	c.2366_2373del8; 2385_2386insAA	Yes	CA	-11	Microhomology deletion	Breast	Patient	PARPi	2385	ctDNA
Vidula_C_10	Patient C	Vidula 2020	BRCA2	c.2385_2386insAA	c.2385_2386insAA; 2395_2414del20	Yes	TC	8	Microhomology deletion	Breast	Patient	PARPi	2385	ctDNA
Vidula_C_11	Patient C	Vidula 2020	BRCA2	c.2385_2386insAA	c.2352_2374del23; 2385_2386insAA	Yes	TCAT	-10	Microhomology deletion	Breast	Patient	PARPi	2385	ctDNA
Vidula_C_12	Patient C	Vidula 2020	BRCA2	c.2385_2386insAA	c.2379_2390del12	Yes	ACAA	0	Microhomology deletion	Breast	Patient	PARPi	2385	ctDNA
Vidula_C_13	Patient C	Vidula 2020	BRCA2	c.2385_2386insAA	c.2380_2397del18	Yes	CAAA	0	Microhomology deletion	Breast	Patient	PARPi	2385	ctDNA
Vidula_C_14	Patient C	Vidula 2020	BRCA2	c.2385_2386insAA	c.2385_2386insAAA	Yes	unclear	0	Microhomology deletion	Breast	Patient	PARPi	2385	ctDNA
Vidula_C_15	Patient C	Vidula 2020	BRCA2	c.2385_2386insAA	c.2385_2386insAA; 2414_2436del23	Yes	AAT	27	Microhomology deletion	Breast	Patient	PARPi	2385	ctDNA
Vidula_C_16	Patient C	Vidula 2020	BRCA2	c.2385_2386insAA	c.2385_2386insAA; 2401_2419dup	No		14	Insertion	Breast	Patient	PARPi	2385	ctDNA
Vidula_E_2	Patient E	Vidula 2020	BRCA2	c.3689delC	c.3668_3700del33	Yes	GCTC	0	Microhomology deletion	Breast	Patient	PARPi	3689	ctDNA
Vidula_E_3	Patient E	Vidula 2020	BRCA2	c.3689delC	c.3680_3681delTG; 3689delC	No		-7	Deletion	Breast	Patient	PARPi	3689	ctDNA
Vidula_E_4	Patient E	Vidula 2020	BRCA2	c.3689delC	c.3689delC; 3699_3703del5	Yes	GC	9	Microhomology deletion	Breast	Patient	PARPi	3689	ctDNA
Vidula_E_5	Patient E	Vidula 2020	BRCA2	c.3689delC	c.3676_3693del18	No		0	Deletion	Breast	Patient	PARPi	3689	ctDNA
Vidula_E_6	Patient E	Vidula 2020	BRCA2	c.3689delC	c.3656_3666del11; 3689delC	Yes	GCT	-22	Microhomology deletion	Breast	Patient	PARPi	3689	ctDNA
Vidula_E_7	Patient E	Vidula 2020	BRCA2	c.3689delC	c.3687_3713del27	Yes	TGT	0	Microhomology deletion	Breast	Patient	PARPi	3689	ctDNA
Vidula_F_1	Patient F	Vidula 2020	BRCA2	c.2808_2811delACAA	c.2808_2811delACAA; 2836_2870del35	Yes	AAAAA	24	Microhomology deletion	Breast	Patient	PARPi	2808	ctDNA
Vidula_F_2	Patient F	Vidula 2020	BRCA2	c.2808_2811delACAA	c.2803_2812del10ins7	No		0	Deletion	Breast	Patient	PARPi	2808	ctDNA
Vidula_H_1	Patient H	Vidula 2020	BRCA2	c.1189_1190insTTAG	c.1189_1190insTTAG; 1215delA	No		24	Deletion	Prostate	Patient	PARPi	1189	ctDNA
Vidula_H_2	Patient H	Vidula 2020	BRCA2	c.1189_1190insTTAG	c.1190_1213del24	No		0	Deletion	Prostate	Patient	PARPi	1189	ctDNA
Vidula_H_3	Patient H	Vidula 2020	BRCA2	c.1189_1190insTTAG	c.1189_1190insTTAG; 1220delA	No		29	Deletion	Prostate	Patient	PARPi	1189	ctDNA
Vidula_H_4	Patient H	Vidula 2020	BRCA2	c.1189_1190insTTAG	c.1154_1155ins8; 1189_1190insTTAG	No		-33	Insertion	Prostate	Patient	PARPi	1189	ctDNA
Vidula_H_5	Patient H	Vidula 2020	BRCA2	c.1189_1190insTTAG	c.1153_1165del13; 1189_1190insTTAG	No		-23	Deletion	Prostate	Patient	PARPi	1189	ctDNA
Vidula_H_6	Patient H	Vidula 2020	BRCA2	c.1189_1190insTTAG	c.1158_1169del12ins2; 1189_1190insTTAG	No		-19	Deletion	Prostate	Patient	PARPi	1189	ctDNA
Vidula_H_7	Patient H	Vidula 2020	BRCA2	c.1189_1190insTTAG	c.1166_1192del27	Yes	AC	0	Microhomology deletion	Prostate	Patient	PARPi	1189	ctDNA
Vidula_H_8	Patient H	Vidula 2020	BRCA2	c.1189_1190insTTAG	c.1183_1191del9	Yes	gAA	0	Microhomology deletion	Prostate	Patient	PARPi	1189	ctDNA
Vidula_H_10	Patient H	Vidula 2020	BRCA2	c.1189_1190insTTAG	c.1104_1122del19; 1189_1190insTTAG	No		-66	Deletion	Prostate	Patient	PARPi	1189	ctDNA
Vidula_H_11	Patient H	Vidula 2020	BRCA2	c.1189_1190insTTAG	c.1112_1118del7; 1189_1190insTTAG	No		-70	Deletion	Prostate	Patient	PARPi	1189	ctDNA
Vidula_H_12	Patient H	Vidula 2020	BRCA2	c.1189_1190insTTAG	c.1114_1145del32insC; 1189_1190insTTAG	No		-43	Deletion	Prostate	Patient	PARPi	1189	ctDNA
Vidula_H_13	Patient H	Vidula 2020	BRCA2	c.1189_1190insTTAG	c.1116_1126del11ins7; 1189_1190insTTAG	No		-62	Deletion	Prostate	Patient	PARPi	1189	ctDNA
Vidula_H_14	Patient H	Vidula 2020	BRCA2	c.1189_1190insTTAG	c.1133_1143del11insA; 1189_1190insTTAG	No		-45	Deletion	Prostate	Patient	PARPi	1189	ctDNA
Vidula_H_15	Patient H	Vidula 2020	BRCA2	c.1189_1190insTTAG	c.1147delA; 1189_1190insTTAG	Yes	A	-41	Microhomology deletion	Prostate	Patient	PARPi	1189	ctDNA
Vidula_H_16	Patient H	Vidula 2020	BRCA2	c.1189_1190insTTAG	c.1160_1189del30	Yes	tt	0	Microhomology deletion	Prostate	Patient	PARPi	1189	ctDNA
Vidula_H_17	Patient H	Vidula 2020	BRCA2	c.1189_1190insTTAG	c.1167_1176del10; 1189_1190insTTAG	Yes	CC	-12	Microhomology deletion	Prostate	Patient	PARPi	1189	ctDNA
Vidula_H_18	Patient H	Vidula 2020	BRCA2	c.1189_1190insTTAG	c.1185delG; 1189_1190insTTAG	Yes	G	-3	Microhomology deletion	Prostate	Patient	PARPi	1189	ctDNA
Vidula_H_19	Patient H	Vidula 2020	BRCA2	c.1189_1190insTTAG	c.1189_1190insTTAG; 1207delC	No		16	Deletion	Prostate	Patient	PARPi	1189	ctDNA
Vidula_H_20	Patient H	Vidula 2020	BRCA2	c.1189_1190insTTAG	c.1189_1190insTTAG; 1219delC	Yes	C	28	Microhomology deletion	Prostate	Patient	PARPi	1189	ctDNA
Vidula_H_21	Patient H	Vidula 2020	BRCA2	c.1189_1190insTTAG	c.1189_1190insTTAG; 1232_1277del46	Yes	AGAAAA	41	Microhomology deletion	Prostate	Patient	PARPi	1189	ctDNA
Vidula_H_22	Patient H	Vidula 2020	BRCA2	c.1189_1190insTTAG	c.1125delC; 1189_1190insTTAG	Yes	C	-63	Microhomology deletion	Prostate	Patient	PARPi	1189	ctDNA
Vidula_H_23	Patient H	Vidula 2020	BRCA2	c.1189_1190insTTAG	c.1144_1165del22; 1189_1190insTTAG	Yes	AC	-23	Microhomology deletion	Prostate	Patient	PARPi	1189	ctDNA
Vidula_H_24	Patient H	Vidula 2020	BRCA2	c.1189_1190insTTAG	c.1153_1165del13; 1189_1190insTTAG	Yes	C	-23	Microhomology deletion	Prostate	Patient	PARPi	1189	ctDNA
Vidula_H_25	Patient H	Vidula 2020	BRCA2	c.1189_1190insTTAG	c.1189_1190insTTAG; 1234_1267del34	Yes	AAAATA	43	Microhomology deletion	Prostate	Patient	PARPi	1189	ctDNA
Vidula_H_26	Patient H	Vidula 2020	BRCA2	c.1189_1190insTTAG	c.1189_1190insTTAG; 1200_1212del13ins3	No		9	Deletion	Prostate	Patient	PARPi	1189	ctDNA
Vidula_I_1	Patient I	Vidula 2020	BRCA2	c.1189_1190insTTAG	c.1189_1190insTTAG; 1212delT	No		21	Deletion	Breast	Patient	PARPi	1189	ctDNA
Vidula_I_2	Patient I	Vidula 2020	BRCA2	c.1189_1190insTTAG	c.1189_1212del24	Yes	T	0	Microhomology deletion	Breast	Patient	PARPi	1189	ctDNA
Vidula_I_3	Patient I	Vidula 2020	BRCA2	c.1189_1190insTTAG	c.1189_1190insTTAG; 1245_1272del28	Yes	CA	54	Microhomology deletion	Breast	Patient	PARPi	1189	ctDNA
Vidula_I_4	Patient I	Vidula 2020	BRCA2	c.1189_1190insTTAG	c.1189_1190insTTAG; 1227delG	No		36	Deletion	Breast	Patient	PARPi	1189	ctDNA
Vidula_I_5	Patient I	Vidula 2020	BRCA2	c.1189_1190insTTAG	c.1189_1190insTTAG; 1246_1255del10	Yes	CAT	55	Microhomology deletion	Breast	Patient	PARPi	1189	ctDNA
Vidula_I_6	Patient I	Vidula 2020	BRCA2	c.1189_1190insTTAG	c.1189_1190insTTAG; 1249_1252del4	Yes	TT	58	Microhomology deletion	Breast	Patient	PARPi	1189	ctDNA
patient 318_1	patient 318	Waks 2019	BRCA2	c.4473_4476delGAAA	c.4458_4468del11; 4473_4476del4	Yes	TA	-14	Microhomology deletion	Breast	Patient	Olaparib	4473	Tumour DNA
patient 318_2	patient 318	Waks 2019	BRCA2	c.4473_4476delGAAA	c.4456_4469del14; 4473_4476del4	No		-16	Deletion	Breast	Patient	Olaparib	4473	ctDNA
patient 318_3	patient 318	Waks 2019	BRCA2	c.4473_4476delGAAA	c.4466_4477del12	Yes	AAA	3	Microhomology deletion	Breast	Patient	Olaparib	4473	ctDNA
patient 318_4	patient 318	Waks 2019	BRCA2	c.4473_4476delGAAA	c.4156_6696del2541	No		0	Deletion	Breast	Patient	Olaparib	4473	ctDNA
patient 318_5	patient 318	Waks 2019	BRCA2	c.4473_4476delGAAA	c.4274_5415del1142	No		0	Deletion	Breast	Patient	Olaparib	4473	ctDNA
patient 339-1	patient 339	Waks 2019	BRCA2	c.5718_5719delCT	c.5641_5877del237	Yes	ATA	0	Microhomology deletion	Breast	Patient	Carboplatin	5718	Tumour DNA
patient 339-2	patient 339	Waks 2019	BRCA2	c.5718_5719delCT	c.5718_5719delCT; 6079_6842+353_del1117	Yes	AA	359	Microhomology deletion	Breast	Patient	Carboplatin	5718	Tumour DNA
Patient 510_1	Patient 510	Waks 2019	BRCA2	c.5153insT	c.5153insT; 5545_6841+77del1374	No		NA	Deletion	Breast	Patient	Carboplatin, paclitaxel, veliparib	5153	Tumour DNA and ctDNA
LO31_1	LO31	Weigelt 2017	BRCA2	c.407delA	c.402_413del12	No		0	Deletion	Breast	Patient	Platinum and talazoparib	407	ctDNA
LO31_2	LO31	Weigelt 2017	BRCA2	c.407delA	c.389_406del18	No		0	Deletion	Breast	Patient	Platinum and talazoparib	407	ctDNA
1109_1	1109	Weigelt 2017	BRCA2	c.750_753delGACA	c.750_753delGACA; 764_765delAC	Yes	AC	10	Microhomology deletion	Breast	Patient	Platinum and PARPi	750	ctDNA
1109_2	1109	Weigelt 2017	BRCA2	c.750_753delGACA	c.739_765del27	Yes	A	0	Microhomology deletion	Breast	Patient	Platinum and PARPi	750	ctDNA
1109_3	1109	Weigelt 2017	BRCA2	c.750_753delGACA	c.728_738del11; 750_753delGACA	Yes	AT	-11	Microhomology deletion	Breast	Patient	Platinum and PARPi	750	ctDNA
1109_4	1109	Weigelt 2017	BRCA2	c.750_753delGACA	c.731_732delAT; 750_753delGACA	Yes	A	-17	Microhomology deletion	Breast	Patient	Platinum and PARPi	750	ctDNA
1109_5	1109	Weigelt 2017	BRCA2	c.750_753delGACA	c.750_753delGACA; 773_774delAA	Yes	A	19	Microhomology deletion	Breast	Patient	Platinum and PARPi	750	ctDNA
1109_6	1109	Weigelt 2017	BRCA2	c.750_753delGACA	c.730_753del24	Yes	GA	0	Microhomology deletion	Breast	Patient	Platinum and PARPi	750	ctDNA
1109_7	1109	Weigelt 2017	BRCA2	c.750_753delGACA	c.735insT; 750_753delGACA	No		-14	Insertion	Breast	Patient	Platinum and PARPi	750	ctDNA
1109_8	1109	Weigelt 2017	BRCA2	c.750_753delGACA	c.750_753delGACA; 763insC	No		9	Insertion	Breast	Patient	Platinum and PARPi	750	ctDNA
1109_9	1109	Weigelt 2017	BRCA2	c.750_753delGACA	c.750_753delGACA; 768insG	No		14	Insertion	Breast	Patient	Platinum and PARPi	750	ctDNA
Yap_25_1	Yap_25	Yap 2020	BRCA2	c.4163_4164delCTinsA	c.4156_4170delGATTTAACTTTTTG	Yes	GA	0	Microhomology deletion	Prostate	Patient	Olaparib	4163	ctDNA
Yap_25_2	Yap_25	Yap 2020	BRCA2	c.4163_4164delCTinsA	c.4163_4164delCTinsA; 4181_4203del23	Yes	AA	16	Microhomology deletion	Prostate	Patient	Olaparib	4163	ctDNA
Yap_25_3	Yap_25	Yap 2020	BRCA2	c.4163_4164delCTinsA	c.4163_4164delCTinsA; 4176_4198del23	No		11	Deletion	Prostate	Patient	Olaparib	4163	ctDNA
Patient D_1	Patient D	Goodall 2017	PALB2	c.757_758delCT	c.740_760del21	Yes	CAG	0	Microhomology deletion	Prostate	Patient	Olaparib	757	ctDNA
Patient D_2	Patient D	Goodall 2017	PALB2	c.757_758delCT	c.731delG; 757_758delCT	Yes	C	-25	Microhomology deletion	Prostate	Patient	Olaparib	757	ctDNA
Kondrashova-5-1	Kondrashova-5	Kondrashova 2017	RAD51C	c.577C>T	c.557_579delinsTGG	No		0	Deletion	Ovarian	Patient	Platinum, rucaparib	577	Tumour DNA
Kondrashova-5-2	Kondrashova-5	Kondrashova 2017	RAD51C	c.577C>T	c.557C>A	No		0	Substitution	Ovarian	Patient	Platinum, rucaparib	577	Tumour DNA
Kondrashova-5-3	Kondrashova-5	Kondrashova 2017	RAD51C	c.577C>T	c.574_577delinsGGCG	No		0	Deletion	Ovarian	Patient	Platinum, rucaparib	577	Tumour DNA
Kondrashova-5-4	Kondrashova-5	Kondrashova 2017	RAD51C	c.577C>T	c.577_578delinsTT	No		0	Deletion	Ovarian	Patient	Platinum, rucaparib	577	Tumour DNA
Kondrashova-6-1	Kondrashova-6	Kondrashova 2017	RAD51D	c.770_776del	c.770_776delinsA	No		0	Insertion	Ovarian	Patient	Platinum, rucaparib	770	Tumour DNA
