# Supplementary material for: Clinical BRCA1/2 Reversion Analysis Identifies Hotspot Mutations and Predicted Neoantigens Associated with Therapy Resistance
Source: Oxford University Press journal article supplement (doi:10.1158/2159-8290.cd-19-1485), 2020-07-22
Supplement: 21598290cd191485-sup-234162_2_supp_6377365_qcdn6v.xlsx [file 21598290cd191485-sup-234162_2_supp_6377365_qcdn6v.xlsx]

## Sheet: tcga_studies
Supplementary Table 4 Sequencing studies used for comparing pathogenic mutations. Studies were queried for BRCA1/2 mutations using cBioPortal.
Study
Ovarian Serous Cystadenocarcinoma (TCGA, Provisional)
Breast Cancer (METABRIC, Nature 2012 & Nat Commun 2016)
Breast Invasive Carcinoma (TCGA, Cell 2015)
Breast Invasive Carcinoma (Sanger, Nature 2012)
Breast Cancer (MSK, Cancer Cell 2018)
The Metastatic Breast Cancer Project (Provisional, October 2018)
Breast Cancer (MSKCC, 2019)
Metastatic Prostate Adenocarcinoma (SU2C/PCF Dream Team, PNAS 2019)
Pancreatic Adenocarcinoma (QCMG, Nature 2016)
Breast Invasive Carcinoma (Broad, Nature 2012)
Breast Invasive Carcinoma (British Columbia, Nature 2012)
Metastatic Breast Cancer (INSERM, PLoS Med 2016)
Prostate Adenocarcinoma (MSKCC/DFCI, Nature Genetics 2018)
Pancreatic Adenocarcinoma (TCGA, Provisional)
