# Supplementary material for: Clinical BRCA1/2 Reversion Analysis Identifies Hotspot Mutations and Predicted Neoantigens Associated with Therapy Resistance
Source: Oxford University Press journal article supplement (doi:10.1158/2159-8290.cd-19-1485), 2020-07-22
Supplement: 21598290cd191485-sup-234162_2_supp_6377366_qcdn4v.xlsx [file 21598290cd191485-sup-234162_2_supp_6377366_qcdn4v.xlsx]

## Sheet: unexplained
Supplementary Table 3 List of cases in collected studies for which reversions were assessed but not identified.
Case	Patient/Cell line	Reference	Gene	Cancer	Site	Clinical	Setting	Drug treatment(s)	Type	Pathogenic mutation (as published)	Pathogenic mutation (standardised)
C2-8	CAPAN-1	Sakai 2008	BRCA2	Pancreatic adenocarcinoma	Pancreatic	Derived from metastatic site in liver	Cell line	Cisplatin	Germline	c.6174delT	c.5946delT
C2-10	CAPAN-1	Sakai 2008	BRCA2	Pancreatic adenocarcinoma	Pancreatic	Derived from metastatic site in liver	Cell line	Cisplatin	Germline	c.6174delT	c.5946delT
C2-11	CAPAN-1	Sakai 2008	BRCA2	Pancreatic adenocarcinoma	Pancreatic	Derived from metastatic site in liver	Cell line	Cisplatin	Germline	c.6174delT	c.5946delT
C2-13	CAPAN-1	Sakai 2008	BRCA2	Pancreatic adenocarcinoma	Pancreatic	Derived from metastatic site in liver	Cell line	Cisplatin	Germline	c.6174delT	c.5946delT
C2-15	CAPAN-1	Sakai 2008	BRCA2	Pancreatic adenocarcinoma	Pancreatic	Derived from metastatic site in liver	Cell line	Cisplatin	Germline	c.6174delT	c.5946delT
C2-16	CAPAN-1	Sakai 2008	BRCA2	Pancreatic adenocarcinoma	Pancreatic	Derived from metastatic site in liver	Cell line	Cisplatin	Germline	c.6174delT	c.5946delT
C2-18	CAPAN-1	Sakai 2008	BRCA2	Pancreatic adenocarcinoma	Pancreatic	Derived from metastatic site in liver	Cell line	Cisplatin	Germline	c.6174delT	c.5946delT
CS9	CS9	Sakai 2008	BRCA2	Ovarian carcinoma	Ovarian		Patient	Platinum	Germline	c.6174delT	c.5946delT
CS15	CS15	Sakai 2008	BRCA2	Ovarian carcinoma	Ovarian		Patient	Platinum	Germline	c.2699delT	2471delT
CS2-2	CS2-2	Sakai 2008	BRCA2	Ovarian carcinoma	Ovarian		Patient	Platinum	Germline	c.8765_8766delAG	c.8537_8538delAG
UW174	UW174	Sakai 2008	BRCA2	Ovarian carcinoma	Ovarian		Patient	Platinum	Germline	c.6174delT	c.5946delT
Patient 1	Patient 1	Meijer 2019	BRCA2	TNBC	Breast	4x ddAC 12x paclitaxel, Capecitabine Carboplatin + gemcitabine 2x cisplatin + 6x nivolumab	Patient	Capecitabine Carboplatin + gemcitabine 2x cisplatin + 6x nivolumab	Germline	c.9104A>C	c.9104A>C
Patient 3	Patient 3	Meijer 2019	BRCA1	TNBC	Breast	5x FEC + tamoxifen, 3x FAC + anastrozol, Tamoxifen Carboplatin + paclitaxel and veliparib	Patient	Carboplatin + paclitaxel and veliparib	Germline	c.5351dupA	c.5351dupA
C4-11	C4-11	Sakai 2009	BRCA2	Ovarian carcinoma	Ovarian		Cell line	Cisplatin resistant but only slightly PARPi (AG14361) resistant	Germline	c.5193C>G	c.4965C>G
C4-4	C4-4	Sakai 2009	BRCA2	Ovarian carcinoma	Ovarian		Cell line	Cisplatin resistant but PARPi (AG14361) sensitive	Germline	c.5193C>G	c.4965C>G
C4-13	C4-13	Sakai 2009	BRCA2	Ovarian carcinoma	Ovarian		Cell line	Slightly Cisplatin resistant and slightly PARPi resistant	Germline	c.5193C>G	c.4965C>G
T250	T250	Brugge 2017	BRCA1	Triple negative Breast cancer	Breast	T250 PDX Orginial patient treated with eoadjuvant chemotherapy consisting of six doses of AC (adria- mycin/cyclophosphamide) or three doses of CD (capecitabine/ docetaxel) followed by six doses of AC.	PDX	Unlcear what treatment either cisplatin, nimustine, olaparib or melphalan	Germline	c.2210delC	c.2210delC
unknown	unknown	Goodall 2017	BRCA2	Prostate Cancer	Prostate		Patient	Olaparib		no sequence given
AOCS-139	AOCS-139	Patch 2015	BRCA1	HGOC	Ovarian		Patient	Platinum	Germline	c.427G>T	c.427G>T
AOCS-065	AOCS-065	Patch 2015	BRCA1	HGOC	Ovarian		Patient	Platinum	Germline	c.379delA	c.379delA
AOCS-150	AOCS-150	Patch 2015	BRCA1	HGOC	Ovarian		Patient	Platinum	Germline	c.5266_5267insC	c.5266_5267insC
AOCS-086	AOCS-086	Patch 2015	BRCA1	HGOC	Ovarian		Patient	Platinum	Somatic	c.3526delG	c.3526delG
Pt196	Pt196	Cruz 2018	BRCA1	HGOC	Ovarian	Carboplatin +paclitaxel, doxorubicin, olaparib	Patient	Olaparib	Germline	c.1961delA	c.1961delA
Pt127	Pt127	Cruz 2018	BRCA1	HGOC	Ovarian	doxorubicin + cyclophosphamide, docetaxol.	Patient	primary reistance to olaparib	Germline	c.68_69delAG	c.68_69delAG
Pt179	Pt179	Cruz 2018	BRCA1	HGOC	Ovarian	epirubicin + cyclophosphamide +5FU, capecitabine, cisplatin	Patient	primary reistance to olaparib	Germline	c.68_69delAG	c.68_69delAG
Subject 6	Subject 6	Christie 2017	BRCA1	HGSOC	Ovarian	Platin-based chemotherapy and taxane at first line treatment.	Patient	Taxane and Platin-based chemotherapy	Germline	c.181T>G	c.181T>G
Subject 7	Subject 7	Christie 2017	BRCA1	HGSOC	Ovarian	Platin-based chemotherapy and taxane at first line treatment.	Patient	Taxane and Platin-based chemotherapy	Germline	c.5266dup	c.5266dup
Subject 8	Subject 8	Christie 2017	BRCA1	HGSOC	Ovarian	Platin-based chemotherapy and taxane at first line treatment.	Patient	Taxane and Platin-based chemotherapy	Germline	c.271del	c.271del
Subject 9	Subject 9	Christie 2017	BRCA2	HGSOC	Ovarian	Platin-based chemotherapy and taxane at first line treatment.	Patient	Taxane and Platin-based chemotherapy	Germline	c.4211C>G	c.4211C>G
Subject 10	Subject 10	Christie 2017	BRCA1	HGSOC	Ovarian	Platin-based chemotherapy and taxane at first line treatment.	Patient	Taxane and Platin-based chemotherapy	Germline	c.1102G>T	c.1102G>T
Subject 11	Subject 11	Christie 2017	BRCA1	HGSOC	Ovarian	Platin-based chemotherapy and taxane at first line treatment.	Patient	Taxane and Platin-based chemotherapy	Germline	c.181T>G	c.181T>G
Subject 12	Subject 12	Christie 2017	BRCA1	HGSOC	Ovarian	Platin-based chemotherapy and taxane at first line treatment.	Patient	Taxane and Platin-based chemotherapy	Germline	c.4120_4121del	c.4120_4121del
Subject 13	Subject 13	Christie 2017	BRCA1	HGSOC	Ovarian	Platin-based chemotherapy and taxane at first line treatment.	Patient	Taxane and Platin-based chemotherapy	Germline	c.68_69del	c.68_69del
Subject 14	Subject 14	Christie 2017	BRCA1	HGSOC	Ovarian	Platin-based chemotherapy and taxane at first line treatment.	Patient	Taxane and Platin-based chemotherapy	Germline	c.3400G>T	c.3400G>T
Subject 15	Subject 15	Christie 2017	BRCA1	HGSOC	Ovarian	Platin-based chemotherapy and taxane at first line treatment.	Patient	Taxane and Platin-based chemotherapy	Germline	c.5503C>T	c.5503C>T
Subject 16	Subject 16	Christie 2017	BRCA1	HGSOC	Ovarian	Platin-based chemotherapy and taxane at first line treatment.	Patient	Taxane and Platin-based chemotherapy	Germline	c.3481_3491del	c.3481_3491del
Cs25	CS25	Norquist 2011	BRCA1	HGSOC	Ovarian		Patient	PARPI and carboplatin	Germline	c.185delAG	c.68_69delAG
CS15	CS15	Norquist 2011	BRCA1	HGSOC	Ovarian		Patient	PARPi	Germline	c.5382insC	c.5263insC
UW336	UW336	Norquist 2011	BRCA1	HGSOC	Ovarian		Patient	PARPi	Germline	c.5083del19	c.4964del19
CS14	CS14	Swisher 2008	BRCA1	HGSOC	Ovarian		Patient	Platinum	Germline	c.185delAG	c.68_69delAG
Lin_55	Lin_55	Lin 2018	BRCA1	HGSOC	Ovarian	ARIEL2;Refractory	Patient	Platinum	Germline	c.3607C>T	c.3607C>T
Lin_50	Lin_50	Lin 2018	BRCA1	HGSOC	Ovarian	ARIEL2;Resistant	Patient	Platinum	Germline	c.3647_3648insA	c.3647_3648insA
Lin_42	Lin_42	Lin 2018	BRCA1	HGSOC	Ovarian	ARIEL2;Resistant	Patient	Platinum	Somatic	c.3804_3804delT	c.3804_3804delT
Lin_24	Lin_24	Lin 2018	BRCA1	HGSOC	Ovarian	ARIEL2;Resistant	Patient	Platinum	Germline	c.1174_1213del40	c.1174_1213del40
Lin_52	Lin_52	Lin 2018	BRCA2	HGSOC	Ovarian	ARIEL2;Refractory	Patient	Platinum	Somatic	c.658_659delGT	c.658_659delGT
Lin_8	Lin_8	Lin 2018	BRCA1	HGSOC	Ovarian	ARIEL2;Resistant	Patient	Platinum	Somatic	c.5135G>A	c.5135G>A
Lin_20	Lin_20	Lin 2018	BRCA1	HGSOC	Ovarian	ARIEL2;Resistant	Patient	Platinum	Somatic	c.5444G>A	c.5444G>A
Lin_21	Lin_21	Lin 2018	BRCA1	HGSOC	Ovarian	ARIEL2;Resistant	Patient	Platinum	Germline	c.135-1G>T	c.135-1G>T
Lin_23	Lin_23	Lin 2018	BRCA1	HGSOC	Ovarian	ARIEL2;Resistant	Patient	Platinum	Germline	c.1793T>G	c.1793T>G
Lin_25	Lin_25	Lin 2018	BRCA1	HGSOC	Ovarian	ARIEL2;Resistant	Patient	Platinum	Germline	c.5263_5264insC	c.5263_5264insC
Lin_26	Lin_26	Lin 2018	BRCA1	HGSOC	Ovarian	ARIEL2;Resistant	Patient	Platinum	Germline	Annotated as BRCA1 germline, no sequence	Annotated as BRCA1 germline, no sequence
Lin_27	Lin_27	Lin 2018	BRCA1	HGSOC	Ovarian	ARIEL2;Resistant	Patient	Platinum	Somatic	c.5074G>A	c.5074G>A
Lin_30	Lin_30	Lin 2018	BRCA1	HGSOC	Ovarian	ARIEL2;Resistant	Patient	Platinum	Germline	c.66_67delAG	c.66_67delAG
Lin_31	Lin_31	Lin 2018	BRCA2	HGSOC	Ovarian	ARIEL2;Resistant	Patient	Platinum	Germline	c.3847_3848delGT	c.3847_3848delGT
Lin_32	Lin_32	Lin 2018	BRCA2	HGSOC	Ovarian	ARIEL2;Resistant	Patient	Platinum	Germline	c.6600_6601delTT	c.6600_6601delTT
Lin_33	Lin_33	Lin 2018	BRCA1	HGSOC	Ovarian	ARIEL2;Resistant	Patient	Platinum	Germline	Annotated as BRCA1 germline, no sequence	Annotated as BRCA1 germline, no sequence
Lin_34	Lin_34	Lin 2018	BRCA1	HGSOC	Ovarian	ARIEL2;Resistant	Patient	Platinum	Somatic	c.2410C>T	c.2410C>T
Lin_35	Lin_35	Lin 2018	BRCA1	HGSOC	Ovarian	ARIEL2;Resistant	Patient	Platinum	Germline	c.66_67delAG	c.66_67delAG
Lin_37	Lin_37	Lin 2018	BRCA1	HGSOC	Ovarian	ARIEL2;Resistant	Patient	Platinum	Germline	c.5161C>T	c.5161C>T
Lin_39	Lin_39	Lin 2018	BRCA2	HGSOC	Ovarian	ARIEL2;Resistant	Patient	Platinum	Germline	c.6065C>G	c.6065C>G
Lin_47	Lin_47	Lin 2018	BRCA1	HGSOC	Ovarian	ARIEL2;Resistant	Patient	Platinum	Germline	c.2834_2836GTA>C	c.2834_2836GTA>C
Lin_48	Lin_48	Lin 2018	BRCA1	HGSOC	Ovarian	ARIEL2;Resistant	Patient	Platinum	Somatic	c.1279G>T	c.1279G>T
Lin_57	Lin_57	Lin 2018	BRCA2	HGSOC	Ovarian	ARIEL2;Refractory	Patient	Platinum	Germline	c.2808_2811delACAA	c.2808_2811delACAA
Lin_58	Lin_58	Lin 2018	BRCA2	HGSOC	Ovarian	ARIEL2;Refractory	Patient	Platinum	Somatic	c.1672_1672delA	c.1672_1672delA
Lin_60	Lin_60	Lin 2018	BRCA1	HGSOC	Ovarian	ARIEL2;Resistant	Patient	Platinum	Germline	c.2494_2494delC	c.2494_2494delC
Lin_61	Lin_61	Lin 2018	BRCA1	HGSOC	Ovarian	ARIEL2;Refractory	Patient	Platinum	Germline	c.3937C>T	c.3937C>T
Lin_64	Lin_64	Lin 2018	BRCA1	HGSOC	Ovarian	ARIEL2;Resistant	Patient	Platinum	Germline	c.213-2A>G	c.213-2A>G
Lin_66	Lin_66	Lin 2018	BRCA2	HGSOC	Ovarian	ARIEL2;Resistant	Patient	Platinum	Germline	c.6209_6212delAAAG	c.6209_6212delAAAG
Lin_67	Lin_67	Lin 2018	BRCA1	HGSOC	Ovarian	ARIEL2;Refractory	Patient	Platinum	Somatic	c.241C>T	c.241C>T
Lin_68	Lin_68	Lin 2018	BRCA1	HGSOC	Ovarian	ARIEL2;Resistant	Patient	Platinum	Germline	c.5263_5264insC	c.5263_5264insC
Lin_72	Lin_72	Lin 2018	BRCA1	HGSOC	Ovarian	ARIEL2;Refractory	Patient	Platinum	Germline	c.68_69delAG	c.68_69delAG
Lin_76	Lin_76	Lin 2018	BRCA2	HGSOC	Ovarian	ARIEL2;Resistant	Patient	Platinum	Germline	c.4808_4808delA	c.4808_4808delA
Lin_77	Lin_77	Lin 2018	BRCA2	HGSOC	Ovarian	ARIEL2;Resistant	Patient	Platinum	Somatic	c.2246_2261delGTGATACTGACTTTCA	c.2246_2261delGTGATACTGACTTTCA
Lin_79	Lin_79	Lin 2018	BRCA1	HGSOC	Ovarian	ARIEL2;Resistant	Patient	Platinum	Germline	c.3626_3627insA	c.3626_3627insA
Lin_82	Lin_82	Lin 2018	BRCA2	HGSOC	Ovarian	ARIEL2;Resistant	Patient	Platinum	Germline	c.5946_5946delT	c.5946_5946delT
Lin_87	Lin_87	Lin 2018	BRCA1	HGSOC	Ovarian	ARIEL2;Refractory	Patient	Platinum	Germline	c.4484G>T	c.4484G>T
Lin_91	Lin_91	Lin 2018	BRCA1	HGSOC	Ovarian	ARIEL2;Resistant	Patient	Platinum	Germline	c.3598C>T	c.3598C>T
Lin_92	Lin_92	Lin 2018	BRCA1	HGSOC	Ovarian	ARIEL2;Resistant	Patient	Platinum	Somatic	c.1296_1303delGGCCAGTG	c.1296_1303delGGCCAGTG
Lin_96	Lin_96	Lin 2018	BRCA1	HGSOC	Ovarian	ARIEL2;Resistant	Patient	Platinum	Somatic	c.1707_1707delC	c.1707_1707delC
Lin_104	Lin_104	Lin 2018	BRCA1	HGSOC	Ovarian	ARIEL2;Resistant	Patient	Platinum	Somatic	Homozygous deletion of BRCA1 (somatic)	Homozygous deletion of BRCA1 (somatic)
Lin_110	Lin_110	Lin 2018	BRCA2	HGSOC	Ovarian	ARIEL2;Resistant	Patient	Platinum	Germline	c.5946_5946delT	c.5946_5946delT
Lin_111	Lin_111	Lin 2018	BRCA2	HGSOC	Ovarian	ARIEL2;Resistant	Patient	Platinum	Germline	c.7558C>T	c.7558C>T
Lin_112	Lin_112	Lin 2018	BRCA1	HGSOC	Ovarian	ARIEL2;Refractory	Patient	Platinum	Germline	c.212+1G>T	c.212+1G>T
Yap_BRCA_3	Yap_BRCA_3	Yap	BRCA1		Ovarian	ComPAKT; Platinum resistant	Patient	Platinum	Germline	c.3331_3334del	c.3331_3334del
Yap_BRCA_4	Yap_BRCA_4	Yap	BRCA2		Ovarian	ComPAKT; Platinum resistant	Patient	Platinum	Germline	c.9253dup	c.9253dup
Yap_BRCA_5	Yap_BRCA_5	Yap	BRCA2		Ovarian	ComPAKT; Platinum resistant	Patient	Platinum	Germline	c.6952C>T	c.6952C>T
Yap_BRCA_6	Yap_BRCA_6	Yap	BRCA2		Breast	ComPAKT; Platinum resistant	Patient	Platinum	Germline	c.9433_9434delTG	c.9433_9434delTG
Yap_BRCA_8	Yap_BRCA_8	Yap	BRCA2		Breast	ComPAKT; Platinum resistant	Patient	Platinum	Germline	c.5946delT	c.5946delT
Yap_BRCA_10	Yap_BRCA_10	Yap	BRCA1		Breast	ComPAKT; Platinum resistant	Patient	Platinum	Germline	c.3331_3334del	c.3331_3334del
Yap_BRCA_11	Yap_BRCA_11	Yap	BRCA2		Breast	ComPAKT; Platinum resistant	Patient	Platinum	Germline	c.751_754delACAG	c.751_754delACAG
Yap_BRCA_12	Yap_BRCA_12	Yap	BRCA1		Ovarian	ComPAKT; Platinum resistant	Patient	Platinum	Germline	c.427G>T	c.427G>T
Yap_BRCA_16	Yap_BRCA_16	Yap	BRCA2		Ovarian	ComPAKT; Platinum resistant	Patient	Platinum	Germline	c.4876_4877delAA	c.4876_4877delAA
Yap_BRCA_17	Yap_BRCA_17	Yap	BRCA1		Ovarian	ComPAKT; Platinum resistant	Patient	Platinum	Germline	c.5571_5579delGATCCCCCA	c.5571_5579delGATCCCCCA
Yap_BRCA_18	Yap_BRCA_18	Yap	BRCA1		Ovarian	ComPAKT; Platinum resistant	Patient	Platinum	Germline	c.66dupA	c.66dupA
Yap_BRCA_19	Yap_BRCA_19	Yap	BRCA1		Ovarian	ComPAKT; Platinum resistant	Patient	Platinum	Somatic	c.81-2A>T Splice	c.81-2A>T
Yap_BRCA_20	Yap_BRCA_20	Yap	BRCA2		Ovarian	ComPAKT; Platinum resistant	Patient	Platinum	Germline	c.517-2A>G Splice	c.517-2A>G
