# Supplementary material for: Clinical BRCA1/2 Reversion Analysis Identifies Hotspot Mutations and Predicted Neoantigens Associated with Therapy Resistance
Source: Oxford University Press journal article supplement (doi:10.1158/2159-8290.cd-19-1485), 2020-07-22
Supplement: 21598290cd191485-sup-234162_2_supp_6377368_qcdn8w.xlsx [file 21598290cd191485-sup-234162_2_supp_6377368_qcdn8w.xlsx]

## Sheet: Neopeptide_output_reversions
Supplementary Table 7 HLA presentation predictions for neopeptides in revertant sequences (Figure 4D).
Case	Gene	Pathogenic Mutation	Reverted allele	% individuals predicted to present at least one neopeptide
#OCT1	BRCA1	c.4724delC	c.4724delC; 4786_4787delTC	100
Vidula_H_10	BRCA2	c.1189_1190insTTAG	c.1104_1122del19; 1189_1190insTTAG	100
Vidula_H_11	BRCA2	c.1189_1190insTTAG	c.1112_1118del7; 1189_1190insTTAG	100
Vidula_H_12	BRCA2	c.1189_1190insTTAG	c.1114_1145del32insC; 1189_1190insTTAG	100
Vidula_H_14	BRCA2	c.1189_1190insTTAG	c.1133_1143del11insA; 1189_1190insTTAG	100
Vidula_H_20	BRCA2	c.1189_1190insTTAG	c.1189_1190insTTAG; 1219delC	100
Vidula_H_22	BRCA2	c.1189_1190insTTAG	c.1125delC; 1189_1190insTTAG	100
Vidula_H_23	BRCA2	c.1189_1190insTTAG	c.1144_1165del22; 1189_1190insTTAG	100
SubjectID_78_2	BRCA1	c.3768_3769delAG	c.3768_3769delAG; 3715delT	100
Vidula_H_15	BRCA2	c.1189_1190insTTAG	c.1147delA; 1189_1190insTTAG	99
Vidula_H_5	BRCA2	c.1189_1190insTTAG	c.1153_1165del13; 1189_1190insTTAG	99
SubjectID_43	BRCA1	c.2560_2561dupGC	c.2624_2655delCAGGAAATGCAGAAGAGGAATGTGCAACATTC; 2560_2561dupGC	99
SubjectID_78_4	BRCA1	c.3768_3769delAG	c.3768_3769delAG; 3696_3705delTAAAGTAAAC	99
AOCS-134	BRCA1	c.2162_2163delTT	c.2122delT; 2162_2163delTT	98
Patient 1_7	BRCA2	c.5946delT	c.5946delT; 5994_5999delAGTGTTinsTATC	98
Patient 1_5	BRCA2	c.5946delT	c.5946delT; 5992_6005delCAAGTGTTTTCTGA	97
Vidula_H_17	BRCA2	c.1189_1190insTTAG	c.1167_1176del10; 1189_1190insTTAG	97
Vidula_H_3	BRCA2	c.1189_1190insTTAG	c.1189_1190insTTAG; 1220delA	97
Patient 1_8	BRCA2	c.5946delT	c.5946delT; 5998_6008delTTTTCTGAAATinsCAA	96
Patient B_3	BRCA2	c.3170_3174delAGAAA	c.3397delAGAAA; 3188_3206del19	95
Vidula_G_3	BRCA1	c.1961delA	c.1961delA; 2067_2113del47	95
SubjectID_78_1	BRCA1	c.3768_3769delAG	c.3768_3769delAG; 3756_3759delGTCT	95
Patient1_5	BRCA2	c.7355delA	c.7355delA; 7384_7391delTCCAATCA	94
Kondrashova-4-1	BRCA1	c.2043dupT	c.1835_1964del; 2043dupT	93
SubjectID_78_5	BRCA1	c.3768_3769delAG	c.3768_3769delAG; 3787_3811delTTGAAGAATAGCTTAAATGACTGCA	93
#OCT10_2	BRCA1	c.3908dupT	c.3908dupT; 3951delG	92
Vidula_I_4	BRCA2	c.1189_1190insTTAG	c.1189_1190insTTAG; 1227delG	92
AOCS-167_6	BRCA2	c.767_771delCAAAT	c.745_783del39	91
Patient 2_16	BRCA2	c.775_776delAG	c.742_780del39	91
Vidula_G_4	BRCA1	c.1961delA	c.1961delA; 2040_2053del14	91
Simmons_5	BRCA2	c.5727_5728insG	c.4989_6146del1158	91
Simmons_9	BRCA2	c.5727_5728insG	c.5292_6025del734insCA	89
SubjectID_75_1	BRCA1	c.2679delG	c.2679delG; 2738_2748delATGAGTCTAAT	89
SubjectID_75_2	BRCA1	c.2679delG	c.2679delG; 2740_2750delGAGTCTAATAT	89
SubjectID_36-2	BRCA2	c.3975_3978dupTGCT	c.3884_3905delAAAATAATATTGAAATGACTAC; 3975_3978dupTGCT	88
Patient 2_4	BRCA2	c.775_776delAG	c.748_757delGTGACAGACA; 775_776delAG	87
F21_0019	BRCA2	c.5444_5447delCTAG	c.5444_5447delCTAG; 5489_5520del32	86
Patient C_1	BRCA2	c.6462_6463delTC	c.6458_6469del12	86
Vidula_E_2	BRCA2	c.3689delC	c.3668_3700del33	86
Vidula_I_6	BRCA2	c.1189_1190insTTAG	c.1189_1190insTTAG; 1249_1252del4	86
LO31_1	BRCA2	c.407delA	c.402_413del12	85
Vidula_H_7	BRCA2	c.1189_1190insTTAG	c.1166_1192del27	85
Patient 1_3	BRCA2	c.5946delT	c.5946delT; 5964_5998del35	84
Patient 1_D7	BRCA2	c.5614A>T	c.5597_6214del618	84
Vidula_E_5	BRCA2	c.3689delC	c.3676_3693del18	84
SubjectID_1-1	BRCA1	c.1125delA	c.1125delA; 1159dupT	84
SubjectID_71	BRCA2	c.262_263delCT	c.262_263delCT; 289_289delG	84
Patient 2_1	BRCA2	c.775_776delAG	c.750_753delGACA; 775_776delAG	83
Patient B_1	BRCA2	c.3170_3174delAGAAA	c.3170_3174delAGAAA; 3195_3198delTAAT	82
#OCT15_1	BRCA1	c.68_69delAG	c.68_69delAG; 85delG	81
Patient1_10	BRCA2	c.7355delA	c.7355delA; 7402_7406delGTAAC; 7408TT>CA	81
Vidula_H_19	BRCA2	c.1189_1190insTTAG	c.1189_1190insTTAG; 1207delC	80
Patient 2_15	BRCA2	c.775_776delAG	c.750delG; 753delAGA; 775_776delAG	79
Patient A	BRCA2	c.4544insA	c.4544insA; 4566_4593del28	79
SubjectID_54-2	BRCA2	c.7558C>T	c.7558C>T; 7559G>T; 7560A>C	79
1109_5	BRCA2	c.750_753delGACA	c.750_753delGACA; 773_774delAA	78
Patient B_2	BRCA2	c.3170_3174delAGAAA	c.3170_3174delAGAAA; 3147_3182del36	78
Vidula_I_3	BRCA2	c.1189_1190insTTAG	c.1189_1190insTTAG; 1245_1272del28	78
Vidula_C_15	BRCA2	c.2385_2386insAA	c.2385_2386insAA; 2414_2436del23	77
Vidula_C_16	BRCA2	c.2385_2386insAA	c.2385_2386insAA; 2401_2419dup	77
Patient 2_32	BRCA2	c.775_776delAG	c.775_776delAG; 812delGGAATTCATT	76
Patient D_2	PALB2	c.757_758delCT	c.731delG; 757_758delCT	76
Subject 5-2	BRCA2	c.771_775delTCAAA	c.817_829del13; 771_775delTCAAA	76
SubjectID_70	BRCA1	c.2521delC	c.2398_2763del366	76
AOCS-167_1	BRCA2	c.767_771delCAAAT	c.750_753delGACA; 767_771delCAAAT	75
Patient 1_1	BRCA2	c.5946delT	c.5946_5990del45	75
Subject 5-1	BRCA2	c.771_775delTCAAA	c.755_758delACAG; 771_775delTCAAA	75
Patient 2_31	BRCA2	c.775_776delAG	c.775_776delAG; 797_839del43	74
Pishvaian-Patient 1-1	BRCA2	c.6486_6489delACAA	c.6448_6473delAAAGTTTCTCCATATCTCTCTCAATT; 6486_6489delACAA	74
Simmons_2	BRCA2	c.5727_5728insG	c.5671_5808del138	74
AOCS-167_7	BRCA2	c.767_771delCAAAT	c.767_782delCAAATCAAAGAGAAG	72
Patient 2_10	BRCA2	c.775_776delAG	c.753_776del24	72
Vidula_H_1	BRCA2	c.1189_1190insTTAG	c.1189_1190insTTAG; 1215delA	72
Vidula_I_1	BRCA2	c.1189_1190insTTAG	c.1189_1190insTTAG; 1212delT	72
Vidula_I_5	BRCA2	c.1189_1190insTTAG	c.1189_1190insTTAG; 1246_1255del10	72
Yap_3	BRCA1	c.427G>T	c.423_432delACCCGAAAA	72
201	BRCA2	c.145G>T	c.145_168del24	70
1109_1	BRCA2	c.750_753delGACA	c.750_753delGACA; 764_765delAC	70
1109_9	BRCA2	c.750_753delGACA	c.750_753delGACA; 768insG	70
Patient 1_D4	BRCA2	c.5614A>T	c.5743_5931del189	70
Patient 14	BRCA2	c.1387delA	c.1355_1380delTACCAAAATCAGAGAAGCCATTAAAT; 1387delA	70
Patient 2_7	BRCA2	c.775_776delAG	c.775_776delAG; 790delC	70
Vidula_H_25	BRCA2	c.1189_1190insTTAG	c.1189_1190insTTAG; 1234_1267del34	70
1109_7	BRCA2	c.750_753delGACA	c.735insT; 750_753delGACA	69
1109_8	BRCA2	c.750_753delGACA	c.750_753delGACA; 763insC	69
Patient 1_4	BRCA2	c.5946delT	c.5946delT; 5959_5966delCAGGTATC	69
UK2223	BRCA2	c.5946delT	c.5946delT; 5952_5959delATCTGTCC	69
#OCT15_2	BRCA1	c.68_69delAG	c.68_69delAG; 113delA	66
#OCT5	BRCA1	c.68_69delAG	c.68_69delAG; 108delC	66
Patient 1_D2	BRCA2	c.5614A>T	c.5839_5904del66	66
AOCS-167_11	BRCA2	c.767_771delCAAAT	c.767_771delCAAAT; 803_815delAAACATCAGGGAA	65
Afghahi-Patient-1-1	BRCA1	c.1360_1361delAG	c.1360_1401del42	64
Mayor-Patient-1-1,AOCS-088	BRCA1	c.5266dupC	NA	64
Patient 2_9	BRCA2	c.775_776delAG	c.775_776delAG; 781delG	64
Vidula_C_2	BRCA2	c.2385_2386insAA	c.2385_2386insAA; 2404_2429del29	64
Vidula_C_8	BRCA2	c.2385_2386insAA	c.2385_2386insAA; 2392insC	64
Patient1_1	BRCA2	c.7355delA	c.7355delA; 7389_7408del20	64
Kondrashova-1-1	BRCA1	c.1175_1214del40	c.1129_1251del123	63
Vidula_C_7	BRCA2	c.2385_2386insAA	c.2354_2364del11; 2385_2386insAA	61
Vidula_H_21	BRCA2	c.1189_1190insTTAG	c.1189_1190insTTAG; 1232_1277del46	61
Patient 1_2	BRCA2	c.5946delT	c.5946delT; 5949_5952dupAAAA	59
patient 318_4	BRCA2	c.4473_4476del4	c.4156_6696del2541	59
Patient1_2	BRCA2	c.7355delA	c.7355delA; 7391_7413del23	59
Patient1_3	BRCA2	c.7355delA	c.7355delA; 7397_7413del17; 7414A>C	59
SubjectID_1-2	BRCA1	c.1125delA	c.1080_1108delCTCAGAGAATCCTAGAGATACTGAAGATG; 1125delA	58
Patient 2_20	BRCA2	c.775_776delAG	c.720_753del34; 775_776delAG	57
Patient 2_14	BRCA2	c.775_776delAG	c.768delA; 775_776delAG	56
Patient B_4	BRCA2	c.3170_3174delAGAAA	c.3078_3176del99	56
Vidula_E_4	BRCA2	c.3689delC	c.3689delC; 3699_3703del5	56
AOCS-167_9	BRCA2	c.767_771delCAAAT	c.767_771delCAAAT; 780delA	55
AOCS-167_15	BRCA2	c.767_771delCAAAT	c.767_771delCAAAT; 816_825delTTCATTTAAA	54
Patient 2_13	BRCA2	c.775_776delAG	c.761delA; 775_776delAG	54
SubjectID_95	BRCA1	c.5266dupC	c.5266dupC; 5276_5277dupAG	54
Gornstein-Patient-1-1	BRCA2	c.3847_3848delGT	c.3838_3864del27	53
Patient 2_17	BRCA2	c.775_776delAG	c.735_748del14; 757insCAGA; 775_776delAG	53
Patient 2_22	BRCA2	c.775_776delAG	c.775_776delAG; 811delG	53
Patient 2_8	BRCA2	c.775_776delAG	c.775_776delAG; 780_792del13	53
Patient 2_3	BRCA2	c.775_776delAG	c.719_758del40; 775_776delAG	52
Patient 2_33	BRCA2	c.775_776delAG	c.775_776delAG; 813_837del25	52
Patient 2_5	BRCA2	c.775_776delAG	c.771delT; 775_776delAG	52
Simmons_8	BRCA2	c.5727_5728insG	c.5721_5750del30	52
SubjectID_63-1	BRCA1	c.3034_3035delAG	c.2971_3001del31; 3034_3035delAG	52
SubjectID_63-2	BRCA1	c.3034_3035delAG	c.2977_3035delinsTTGAGGAACATTCAATGTCACCTGAA	52
SubjectID_63-5	BRCA1	c.3037_3038delGA	c.2977_3007delAAATGTAAGAAAAATCTGCTAGAGGAAAACT; 3037_3038delGA	52
Tao_1	BRCA2	c.5410_5411delGT	c.4434_5686del1253insTT	52
AOCS-167_8	BRCA2	c.767_771delCAAAT	c.767_775delCAAATCAAA	51
Simmons_1	BRCA2	c.5727_5728insG	c.5528_5956del429	50
SubjectID_54-1	BRCA2	c.7558C>T	c.7558C>T; 7560A>C	50
SubjectID_63-3	BRCA1	c.3034_3035delAG	c.3018_3059del42	50
Yap_25_3	BRCA2	c.4163_4164delCTinsA	c.4163_4164delCTinsA; 4176_4198del23	50
Patient 2_19	BRCA2	c.775_776delAG	c.723_759del37; 775_776delAG	49
Vidula_C_10	BRCA2	c.2385_2386insAA	c.2385_2386insAA; 2395_2414del20	49
Vidula_E_6	BRCA2	c.3689delC	c.3656_3666del11; 3689delC	49
SubjectID_85	BRCA2	c.8533_8536delAGAG	c.8529_8537delTGAAAGAGA	49
AOCS-167_4	BRCA2	c.767_771delCAAAT	c.767_771delCAAAT; 817_830delTCATTTAAAGTAAAinsG	48
Patient 2_29	BRCA2	c.775_776delAG	c.775_776delAG; 799_811del13	48
Vidula_C_1	BRCA2	c.2385_2386insAA	c.2385_2386insAA; 2401_2420del20	48
SubjectID_2-4	BRCA1	c.1045G>T	c.1035_1055delTCCCCTGTGTGAGAGAAAAGA	48
Patient 2_12	BRCA2	c.775_776delAG	c.766_772delACAAATC; 775_776delAG	47
Patient 2_24	BRCA2	c.775_776delAG	c.775_776delAG; 807delA	47
Patient 2_28	BRCA2	c.775_776delAG	c.775_776delAG; 806delC	47
Subject 5-4	BRCA2	c.771_775delTCAAA	c.796_814del19; 771_775delTCAAA	47
Vidula_C_3	BRCA2	c.2385_2386insAA	c.2385_2386insAA; 2412_2452del41	46
Vidula_C_6	BRCA2	c.2385_2386insAA	c.2385_2386insAA; 2397insA	46
Vidula_C_9	BRCA2	c.2385_2386insAA	c.2366_2373del8; 2385_2386insAA	46
Yap_25_2	BRCA2	c.4163_4164delCTinsA	c.4163_4164delCTinsA; 4181_4203del23	46
Kondrashova-6-1	RAD51D	c.770_776del	c.770_776delinsA	45
AOCS-167_5	BRCA2	c.767_771delCAAAT	c.725_755delAAAATGATAGATTTATCGCTTCTGTGACAGA; 767_771delCAAAT	44
Subject 5-3	BRCA2	c.771_775delTCAAA	c.771_775delTCAAA; 725_755del31	44
AOCS-167_2	BRCA2	c.767_771delCAAAT	c.767_771delCAAAT; 779_785delAAGCTGC	43
Subject 5-5	BRCA2	c.771_775delTCAAA	c.782delCTGCAAG; 771_775delTCAAA	43
SubjectID_2-2	BRCA1	c.1045G>T	c.1045G>T; 1047G>T	43
SubjectID_2-5	BRCA1	c.1045G>T	c.1045G>T; 1047G>C	43
Simmons_11	BRCA2	c.5727_5728insG	c.5362_6340del973insGATACCA	42
SubjectID_44	BRCA2	c.1561delT	c.1546_1575delTTCAATGCAAGTTTTTCAGGTCATATGACT	42
Yap_13	BRCA1	c.4327C>T	c.4320_4352del33	42
AOCS-167_13	BRCA2	c.767_771delCAAAT	c.767_771delCAAAT; 806_830del25	41
AOCS-167_14	BRCA2	c.767_771delCAAAT	c.767_771delCAAAT; 812_833delGGAATTCATTTAAAGTAAATAG	41
patient 318_2	BRCA2	c.4473_4476del4	c.4456_4469del14; 4473_4476del4	41
Vidula_C_5	BRCA2	c.2385_2386insAA	c.2362_2369del8; 2385_2386insAA	40
SubjectID_75_17	BRCA1	c.2679delG	Sequence not shown SubjectID_75_17	40
Patient 1_10	BRCA2	c.5754_5755delTA	c.5736delA; 5754_5755delTA	39
Vidula_H_8	BRCA2	c.1189_1190insTTAG	c.1183_1191del9	38
Vidula_B_1	BRCA2	c.4876_4877delAA	c.4876_4887del	36
Patient1_9	BRCA2	c.7355delA	c.7355delA; 7369_7382delTTTAACAAAAACAA	36
SubjectID_55	BRCA1	c.3607C>T	c.3607C>T; 3608G>T	36
CS1	BRCA2	c.4965delC	c.4965delC; 4949insA	32
Patient 2_34	BRCA2	c.775_776delAG	c.775_776delAG; 811delGGG; 815insAC	32
Patient 2_23	BRCA2	c.775_776delAG	c.775_776delAG; 801delA	31
Patient 2_2	BRCA2	c.775_776delAG	c.775_776delAG; 779_785delAAGCTGC	29
UK1999	BRCA2	c.5946delT	c.5946delT; 5954_6090del137	29
Patient 2_6	BRCA2	c.775_776delAG	c.771_788del18	28
SubjectID_78_3	BRCA1	c.3768_3769delAG	c.3768_3769delAG; 3778_3808delTTATTATCATTGAAGAATAGCTTAAATGACT	28
Vidula_H_2	BRCA2	c.1189_1190insTTAG	c.1190_1213del24	27
SubjectID_63-6	BRCA1	c.3037_3038delGA	c.3035_3040delGAGAAA	27
Kondrashova-5-1	RAD51C	c.577C>T	c.557_579delinsTGG	26
1109_4	BRCA2	c.750_753delGACA	c.731_732delAT; 750_753delGACA	25
AOCS-167_10	BRCA2	c.767_771delCAAAT	c.767_771delCAAAT; 794_833del40	25
Patient 1_9	BRCA2	c.5946delT	c.5944_5952delAGTGGAAAA	25
Patient 2_11	BRCA2	c.775_776delAG	c.768_788del21	25
Vidula_A_1	BRCA2	c.5576_5579delTTAA	c.5550_5572del23; 5576_5579delTTAA	24
Patient C_2	BRCA2	c.6462_6463delTC	c.6664_6690del27	24
Vidula_H_16	BRCA2	c.1189_1190insTTAG	c.1160_1189del30	24
Subject 3	BRCA2	c.151G>T	c.151G>T; 152A>T	24
Barber_2	BRCA2	c.4473_4476delGAAA	c.4466_4477delAAATACTGAAAG	23
Kondrashova-5-4	RAD51C	c.577C>T	c.577_578delinsTT	23
Patient 2_26	BRCA2	c.775_776delAG	c.775_776delAG; 795_806del12; 813_828del16	23
patient 318_3	BRCA2	c.4473_4476del4	c.4466_4477del12	23
Vidula_C_12	BRCA2	c.2385_2386insAA	c.2379_2390del12	23
Vidula_C_13	BRCA2	c.2385_2386insAA	c.2380_2397del18	23
Vidula_E_3	BRCA2	c.3689delC	c.3680_3681delTG; 3689delC	23
Patient 2_30	BRCA2	c.775_776delAG	c.775_776delAG; 814_823delAATTCATTTA	21
1109_3	BRCA2	c.750_753delGACA	c.728_738del11; 750_753delGACA	20
Patient 1_11	BRCA2	c.5754_5755delTA	c.5748_5754delTTCACATinsC	20
Patient 1_D1	BRCA2	c.5614A>T	c.5728_5904del177	20
Vidula_C_11	BRCA2	c.2385_2386insAA	c.2352_2374del23; 2385_2386insAA	20
Simmons_3	BRCA2	c.5727_5728insG	c.5727_5731del5insAGACT	20
Simmons_4	BRCA2	c.5727_5728insG	c.5726_5735del10insT	20
Kondrashova-3-1	BRCA1	c.1892delT	c.1279_2139del	18
Vidula_G_2	BRCA1	c.1961delA	c.1961delA; 1996_2051del56	17
Patient1_8	BRCA2	c.7355delA	c.7355delA; 7366_7379delCAGTTTAACAAAAA	17
patient 318_1	BRCA2	c.4473_4476del4	c.4458_4468del11; 4473_4476del4	16
patient 339-1	BRCA2	c.5718_5719delCT	c.5641_5877del237	16
Patient1_6	BRCA2	c.7355delA	c.7355delA; 7363_7373delCATCAGTTTAA	16
Kondrashova-5-3	RAD51C	c.577C>T	c.574_577delinsGGCG	15
Patient 1_D3	BRCA2	c.5614A>T	c.5830_5856del27	15
Vidula_C_14	BRCA2	c.2385_2386insAA	c.2385_2386insAAA	15
Patient D_1	PALB2	c.757_758delCT	c.740_760del21	15
Tao_2	BRCA2	c.5410_5411delGT	c.4897_6807del1911	15
UW40_2	BRCA1	c.2475delC	c.2475delC; 2487_2509del23	15
Patient 2	BRCA1	c.4327C>T	c.4327C>T;4329A>G	14
Yap_25_1	BRCA2	c.4163_4164delCTinsA	c.4156_4170delGATTTAACTTTTTG	14
Simmons_6	BRCA2	c.5727_5728insG	c.5709_5727del19insG	13
SubjectID_53	BRCA2	c.5164_5165delAG	c.5153_5165delATAATTCAAACAGinsC	12
Patient 2_18	BRCA2	c.775_776delAG	c.729_782del54	11
SubjectID_63-4	BRCA1	c.3034_3035delAG	c.2284_3453del1170	10
Vidula_E_7	BRCA2	c.3689delC	c.3687_3713del27	8
Patient 1_D5	BRCA2	c.5614A>T	c.5670_5909del240	7
Vidula_C_4	BRCA2	c.2385_2386insAA	c.2370_2387del18	7
SubjectID_2-1	BRCA1	c.1045G>T	c.1045G>T; 1046A>G	7
SubjectID_46	BRCA1	c.68_69delAG	c.65_79delTAGAGTGTCCCATCT	7
Patient 1_D6	BRCA2	c.5614A>T	c.5766_5897del132	5
Patient 1_6	BRCA2	c.5946delT	c.5941_5956delGCAAGTGGAAAATCTGinsA	4
Patient 2_27	BRCA2	c.775_776delAG	c.775_776delAG; 806_836del31	4
Vidula_G_1	BRCA1	c.1961delA	c.1961delA; 1990_2033del44	4
Patient 2_21	BRCA2	c.775_776delAG	c.775_776delAG; 799insCA; 800G>A	3
Yap_7_1	BRCA1	c.4041_4042delAG	c.4041_4042delAG; 4062delT	3
SubjectID_63-7	BRCA1	c.3037_3038delGA	c.3007_3016delTTTGAGGAAC; 3037_3038delGA	2
SubjectID_2-6	BRCA1	c.1045G>T	c.1045G>A	1
#OCT10_1	BRCA1	c.3908dupT	c.3908dupT; 3926delA	0
1109_2	BRCA2	c.750_753delGACA	c.739_765del27	0
1109_6	BRCA2	c.750_753delGACA	c.730_753del24	0
AOCS-034_1	BRCA1	c.188T>A	c.188T>A; 189A>C	0
AOCS-034_2	BRCA1	c.188T>A	c.187T>C; 188T>A	0
Barber_1	BRCA2	c.8878C>T	c.8878C>G	0
LO31_2	BRCA2	c.407delA	c.389_406del18	0
Patient 5	BRCA2	c.1499delG	c.1416_1420delGCATC; 1499delG	0
Vidula_F_1	BRCA2	c.2808_2811delACAA	c.2808_2811delACAA; 2836_2870del35	0
Vidula_H_18	BRCA2	c.1189_1190insTTAG	c.1185delG; 1189_1190insTTAG	0
Vidula_I_2	BRCA2	c.1189_1190insTTAG	c.1189_1212del24	0
Patient1_7	BRCA2	c.7355delA	c.7352_7372del21	0
Simmons_10	BRCA2	c.5727_5728insG	c.5728_5733delAATGAT	0
Simmons_7	BRCA2	c.5727_5728insG	c.5722_5730delCTAGATAAT	0
SubjectID_2-3	BRCA1	c.1045G>T	c.1039_1077delCTGTGTGAGAGAAAAGAATGGAATAAGCAGAAACTGCCA	0
Yap_7_2	BRCA1	c.4041_4042delAG	c.4041_4042delAG; 4050delC	0
Yap_res	BRCA1	c.329insA	c.329insA; 335_338delATAA	0
