# Supplementary material for: Clinical BRCA1/2 Reversion Analysis Identifies Hotspot Mutations and Predicted Neoantigens Associated with Therapy Resistance
Source: Oxford University Press journal article supplement (doi:10.1158/2159-8290.cd-19-1485), 2020-07-22
Supplement: 21598290cd191485-sup-234162_2_supp_6377369_qcdnxw.xlsx [file 21598290cd191485-sup-234162_2_supp_6377369_qcdnxw.xlsx]

## Sheet: Primary_1000G_scores
Supplementary Table 6 |Binding scores based on NetMHCpan4.0 and HLA types across the 1000 genomes project individuals for neopeptides derived from out-of-frame sequence produced by the frameshift mutations shown. Pathogenic mutations that do not result in frameshifts or novel protein sequence are omitted.
Gene	Pathogenic Mutation	% 1000 genomes individuals predicted to bind at least one neopeptide
BRCA1	c.2679delG	100
BRCA1	c.4724delC	99
BRCA2	c.5164_5165delAG	99
BRCA2	c.5946delT	99
BRCA1	c.1125delA	98
BRCA1	c.2560_2561dupGC	98
BRCA2	c.4771insA	98
BRCA1	c.1961delA	97
BRCA2	c.1499delG	96
BRCA2	c.1189_1190insTTAG	94
BRCA1	c.5266dupC	87
RAD51D	c.770_776del	87
BRCA2	c.4163_4164delCTinsA	85
BRCA2	c.5444_5447delCTAG	85
BRCA2	c.750_753delGACA	84
BRCA1	c.3908dupT	77
BRCA2	c.262_263delCT	74
BRCA2	c.767_771delCAAAT	72
BRCA2	c.771_775delTCAAA	72
BRCA1	c.1892delT	70
BRCA1	c.68_69delAG	66
BRCA2	c.1561delT	62
BRCA2	c.7355delA	59
BRCA1	c.2475delC	57
BRCA2	c.6486_6489delACAA	53
BRCA2	c.4473_4476del4	52
BRCA2	c.4473_4476delGAAA	52
BRCA2	c.3689delC	51
BRCA2	c.4876_4877delAA	51
BRCA2	c.775_776delAG	49
BRCA2	c.2385_2386insAA	45
BRCA1	c.3034_3035delAG	44
BRCA1	c.3037_3038delGA	44
BRCA2	c.407delA	43
BRCA2	c.6689_6690delTC	43
PALB2	c.957_958delAG	30
BRCA2	c.2808_2811delACAA	28
BRCA2	c.1387delA	26
BRCA2	c.8533_8536delAGAG	25
BRCA2	c.5754_5755delTA	13
BRCA2	c.5410_5411delGT	7
BRCA1	c.2521delC	1
BRCA1	c.1175_1214del40	0
BRCA1	c.2162_2163delTT	0
BRCA1	c.329insA	0
BRCA2	c.3397_3401delAGAAA	0
BRCA1	c.3768_3769delAG	0
BRCA2	c.3847_3848delGT	0
BRCA2	c.3975_3978dupTGCT	0
BRCA1	c.4041_4042delAG	0
BRCA2	c.5576_5579delTTAA	0
BRCA2	c.5718_5719delCT	0
BRCA2	c.5727_5728insG	0
